# Supplementary material for: Synthesis of thiocyanato-containing phenanthrenes and dihydronaphthalenesviaLewis acid-activated tandem electrophilic thiocyanation/carbocyclization of alkynes
Source: Royal Society of Chemistry journal article supplement (doi:10.1039/d3ob00001j), 2023-01-01

Supporting Information

**Synthesis of thiocyanato-containing phenanthrenes and  
dihydronaphthalenes via Lewis acid-activated tandem electrophilic  
thiocyanation/carbocyclization of alkynes**

Yong Gao, Ruirui Hua, Hongquan Yin, and Fu-Xue Chen\*

School of Chemistry & Chemical Engineering, Beijing Institute of Technology (Liangxiang  
Campus), Beijing 102488, China

Key Laboratory of Medical Molecule Science and Pharmaceutics Engineering, Ministry of  
Industry and Information Technology, Beijing Institute of Technology (Liangxiang Campus),  
Beijing 102488, China

E-mail: [fuxue.chen@bit.edu.cn](mailto:fuxue.chen@bit.edu.cn)

**Contents**

|                                                                                    |     |
|------------------------------------------------------------------------------------|-----|
| 1. General Information .....                                                       | S2  |
| 2. Preparation of the Starting Materials .....                                     | S2  |
| 3. General procedure for the synthesis of the desired products.....                | S13 |
| 4. Gram scale reaction and derivatization of products .....                        | S25 |
| 5. X-Ray Structure of <b>3d</b> (CCDC 2210343) .....                               | S28 |
| 6. HPLC Chromatograms .....                                                        | S29 |
| 7. References .....                                                                | S30 |
| 8. Copies of <sup>1</sup> H, <sup>13</sup> C and <sup>31</sup> P NMR spectra ..... | S31 |

## 1. General Information

All chemicals were bought from commercial companies and used directly unless noted. The solvents were dried by standard methods when necessary. All reactions monitored by TLC.  $^1\text{H}$  and  $^{13}\text{C}\{^1\text{H}\}$  NMR spectra were recorded on a Bruker 400 or 700 instrument in  $\text{CDCl}_3$ . All the NMR spectra were referenced to residual  $\text{CHCl}_3$  (7.26 ppm,  $^1\text{H}$ ; 77.16 ppm,  $^{13}\text{C}\{^1\text{H}\}$ ). Data for  $^1\text{H}$  NMR are recorded as follows: chemical shift ( $\delta$ , ppm), multiplicity (s = singlet, d = doublet, t = triplet, m = multiplet, q = quartet, septet; coupling constant(s) are in Hz, integration). Data for  $^{13}\text{C}\{^1\text{H}\}$  NMR are reported in terms of chemical shift ( $\delta$ , ppm). The high resolution mass spectrum (HRMS) were recorded on an Agilent (Q-TOF6520) unit with an ESI source. IR spectra were measured on a Shimadzu IRAffinity-1s spectrometer. Melting points were measured on a binocular microscope XT4A melting point apparatus (uncorrected).

## 2. Preparation of the Starting Materials

Reagents **2a–d** were synthesized according to our previous works.<sup>1–4</sup> arene–alkynes **1a**,<sup>5–6</sup> **1b–d**,<sup>7</sup> **1e–k**,<sup>5,8</sup> **1l**,<sup>9</sup> **1m**,<sup>10–11</sup> **1n–r**,<sup>5–6</sup> **1s–v**,<sup>5,8</sup> **1w**<sup>7</sup> were synthesized according to the previously reported procedures. The unconjugated arene–alkynes **4a–g**,<sup>12</sup> **4h**,<sup>13</sup> **4i**,<sup>14</sup> **4j**<sup>15</sup> were synthesized following the known literature procedures. Other substrates **6**,<sup>16</sup> **8**,<sup>9</sup> and **10**<sup>8</sup> were prepared according to literature procedures. The slightly modified procedures of **1a–d**, **1n–r**, **1e–k**, **1s–v** and **4a–g** as follows.

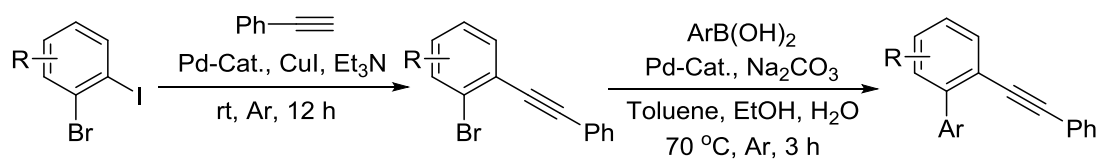

**Procedure for the Synthesis of 1a and 1n–r.** An oven-dried flask was charged with *o*-bromoiodobenzene (987 mg, 3.5 mmol), PdCl<sub>2</sub>(PPh<sub>3</sub>)<sub>2</sub> (123 mg, 0.175 mmol) and CuI (67 mg, 0.35 mmol). The flask was degassed and filled with argon, then Et<sub>3</sub>N (30.0 ml) was added. The mixture was stirred for 15 min before being treated with phenylacetylene (393 mg, 3.85 mmol) dropwise. The resulting solution was stirred at room temperature for 12 h. After the completion of the reaction, the reaction was quenched with sat. NH<sub>4</sub>Cl and extracted with ethyl acetate. The combined organic extracts were dried over Na<sub>2</sub>SO<sub>4</sub>, filtered, and concentrated in vacuo. The crude mixture was purified by flash chromatography using petroleum ether as an eluent. Under an argon atmosphere, to a solution of Na<sub>2</sub>CO<sub>3</sub> (424 mg, 4.0 mmol) in toluene (10.0 mL),

ethanol (5.0 mL), and water (5.0 mL) was added the above products (512 mg, 2.0 mmol) at room temperature. Then, to this mixture was added aryl boronic acid (2.6 mmol, 1.3 equiv) and PdCl<sub>2</sub>(PPh<sub>3</sub>)<sub>2</sub> (70 mg, 0.1 mmol), and the resulting solution was heated to 70 °C for 3 h. After the completion of the reaction, the solution was cooled to room temperature and extracted with ethyl acetate, the combined organic phased were washed with brine and dried over Na<sub>2</sub>SO<sub>4</sub>, filtered, and concentrated in vacuo. The residue was purified by flash chromatography (petroleum ether/EtOAc = 100:1, v/v).

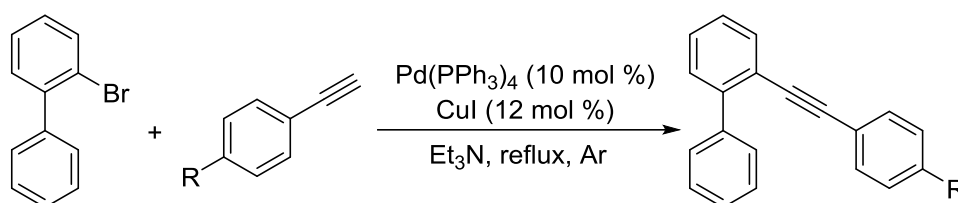

**Procedure for the Synthesis of 1b–d.** Under an argon atmosphere, 2-bromo-1,1'-biphenyl (466 mg, 2.0 mmol), 4-substituted phenylacetylene (2.2 mmol, 1.1 equiv), Pd(PPh<sub>3</sub>)<sub>4</sub> (231 mg, 0.2 mmol), CuI (46 mg, 0.24 mmol), and Et<sub>3</sub>N (8.0 mL) were added continuously into an oven-dried flask and the resulting mixture was refluxed for 10 h. After the completion of the reaction, it was cooled to room temperature and extracted with ethyl acetate, the combined organic phased were washed with brine and dried over Na<sub>2</sub>SO<sub>4</sub>, filtered, and concentrated in vacuo. The residue was purified by flash chromatography (petroleum ether/EtOAc = 100:1, v/v).

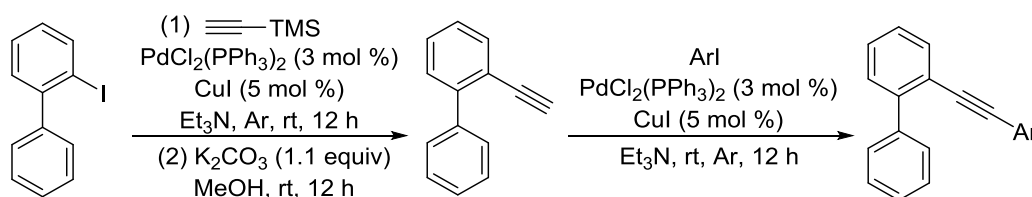

**Procedure for the Synthesis of 1e–k and 1s–v.** Under an argon atmosphere, 2-iodo-1,1'-biphenyl (1.12 g, 4.0 mmol), PdCl<sub>2</sub>(PPh<sub>3</sub>)<sub>2</sub> (84 mg, 0.12 mmol), and CuI (38 mg, 0.2 mmol) were charged into an oven-dried flask. Then, Et<sub>3</sub>N (15.0 mL) was added and the mixture was stirred for 15 min. Subsequently, trimethylsilylacetylene (392 mg, 4.0 mmol) was added dropwise to the mixture and stirred at room temperature for 12 h. The resulting solution was passed through a layer of Celite, then extracted with ethyl acetate, the combined organic phased were washed with brine and dried over Na<sub>2</sub>SO<sub>4</sub>, filtered, and concentrated in vacuo. The residue was dissolved in MeOH (40.0 mL). K<sub>2</sub>CO<sub>3</sub> (607 mg, 4.4 mmol) was added to the mixture and stirred at room temperature for 12 h. After

the completion of the reaction, the solid material was removed by filtration. The filtrate was concentrated in vacuo. The crude mixture was purified by flash chromatography using petroleum ether as an eluent. To a solution of aryl iodide (1.0 mmol, 1.0 equiv) and the above products (187 mg, 1.05 mmol) in Et<sub>3</sub>N (10.0 mL) were added PdCl<sub>2</sub>(PPh<sub>3</sub>)<sub>2</sub> (21 mg, 0.03 mmol) and CuI (9.5 mg, 0.05 mmol). The mixture was then stirred under an argon atmosphere at room temperature for 12 h. After the completion of the reaction, the reaction was quenched with sat. NH<sub>4</sub>Cl and extracted with ethyl acetate. The combined organic extracts were washed with brine and dried over Na<sub>2</sub>SO<sub>4</sub>, filtered, and concentrated in vacuo. The residue was purified by flash chromatography (petroleum ether/EtOAc = 100:1 to 50:1, v/v).

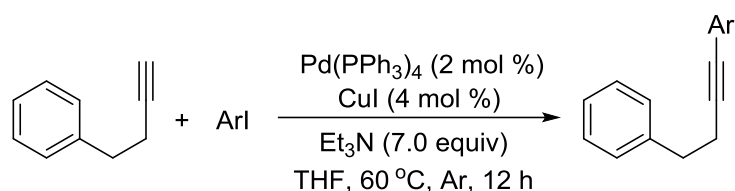

**Procedure for the Synthesis of 4a–g.** An oven-dried flask was charged with Pd(PPh<sub>3</sub>)<sub>4</sub> (23 mg, 0.02 mmol), CuI (7.6 mg, 0.04 mmol) and THF (3.0 mL) under an argon atmosphere, and the mixture was stirred for 5 min. Then aryl iodide (1.0 mmol, 1.0 equiv) and Et<sub>3</sub>N (707 mg, 7.0 mmol) were added and stirred for 5 min. Subsequently, 4-phenyl-1-butyne (143 mg, 1.1 mmol) was added dropwise and the solution was heated to 60 °C for 12 h. After the completion of the reaction, the solution was cooled to room temperature and extracted with ethyl acetate, the combined organic phases were washed with brine and dried over Na<sub>2</sub>SO<sub>4</sub>, filtered, and concentrated in vacuo. The residue was purified by flash chromatography using petroleum ether as an eluent.

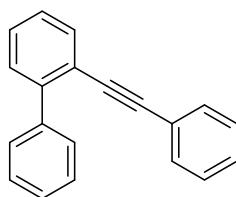

**2-(Phenylethynyl)-1,1'-biphenyl (1a).**<sup>5</sup> Yellow oil; 396 mg, 78% yield; <sup>1</sup>H NMR (400 MHz, CDCl<sub>3</sub>) δ 7.70–7.66 (m, 3H), 7.49–7.39 (m, 5H), 7.37–7.29 (m, 6H).

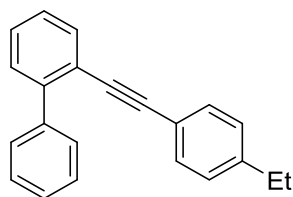

**2-((4-Ethylphenyl)ethynyl)-1,1'-biphenyl (1b).**<sup>7</sup> Yellow oil; 180 mg, 32% yield; <sup>1</sup>H NMR (400 MHz, CDCl<sub>3</sub>)  $\delta$  7.69–7.64 (m, 3H), 7.48–7.37 (m, 5H), 7.33 (td,  $J = 7.2, 1.6$  Hz, 1H), 7.26 (d,  $J = 8.0$  Hz, 2H), 7.13 (d,  $J = 8.0$  Hz, 2H), 2.64 (q,  $J = 7.6$  Hz, 2H), 1.22 (t,  $J = 7.6$  Hz, 3H).

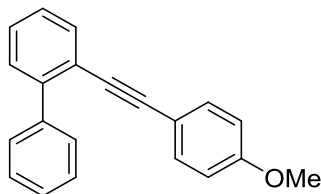

**2-((4-Methoxyphenyl)ethynyl)-1,1'-biphenyl (1c).**<sup>7</sup> Yellow oil; 310 mg, 55% yield; <sup>1</sup>H NMR (400 MHz, CDCl<sub>3</sub>)  $\delta$  7.68 (d,  $J = 7.2$  Hz, 2H), 7.63 (d,  $J = 7.6$  Hz, 1H), 7.46 (t,  $J = 7.2$  Hz, 2H), 7.42–7.36 (m, 3H), 7.33 (td,  $J = 7.2, 1.6$  Hz, 1H), 7.27 (d,  $J = 9.2$  Hz, 2H), 6.82 (d,  $J = 8.8$  Hz, 2H), 3.80 (s, 3H).

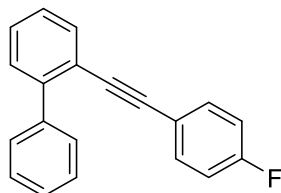

**2-((4-Fluorophenyl)ethynyl)-1,1'-biphenyl (1d).**<sup>8</sup> Yellow oil; 228 mg, 42% yield; <sup>1</sup>H NMR (400 MHz, CDCl<sub>3</sub>)  $\delta$  7.66 (t,  $J = 7.2$  Hz, 3H), 7.49–7.39 (m, 5H), 7.36–7.29 (m, 3H), 6.99 (t,  $J = 8.8$  Hz, 2H).

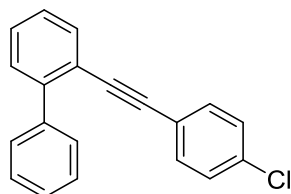

**2-((4-Chlorophenyl)ethynyl)-1,1'-biphenyl (1e).**<sup>7</sup> Yellow oil; 247 mg, 86% yield; <sup>1</sup>H NMR (400 MHz, CDCl<sub>3</sub>)  $\delta$  7.65–7.62 (m, 3H), 7.46–7.37 (m, 5H), 7.32 (td,  $J = 7.2, 2.0$  Hz, 1H), 7.23 (dd,  $J = 11.6, 8.8$  Hz, 4H).

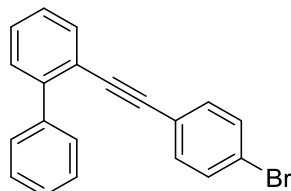

**2-((4-Bromophenyl)ethynyl)-1,1'-biphenyl (1f).**<sup>7</sup> Colorless oil; 265 mg, 80% yield; <sup>1</sup>H NMR (400 MHz, CDCl<sub>3</sub>)  $\delta$  7.65 (d,  $J = 7.2$  Hz, 3H), 7.48–7.39 (m, 7H), 7.34 (td,  $J = 7.6, 2.0$  Hz, 1H), 7.18 (d,  $J = 8.4$  Hz, 2H).

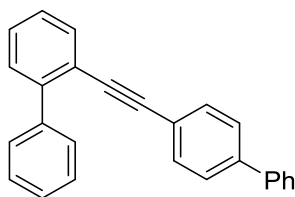

**2-((1,1'-Biphenyl)-4-ylethynyl)-1,1'-biphenyl (1g).**<sup>7</sup> White solid; 214 mg, 65% yield; mp: 64–66 °C (lit. 94.1–95.3 °C); <sup>1</sup>H NMR (400 MHz, CDCl<sub>3</sub>) δ 7.70 (t, *J* = 7.2 Hz, 3H), 7.60–7.34 (m, 15H).

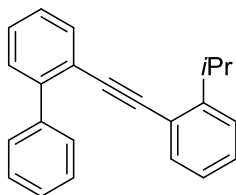

**2-((2-Isopropylphenyl)ethynyl)-1,1'-biphenyl (1h).** Colorless oil; 257 mg, 87% yield; <sup>1</sup>H NMR (400 MHz, CDCl<sub>3</sub>) δ 7.69–7.63 (m, 3H), 7.47–7.34 (m, 7H), 7.27–7.22 (m, 2H), 7.11 (td, *J* = 7.2, 1.6 Hz, 1H), 3.21 (septet, *J* = 6.9 Hz, 1H), 1.15 (d, *J* = 6.8 Hz, 6H); <sup>13</sup>C NMR (100 MHz, CDCl<sub>3</sub>) δ 150.5, 143.8, 140.8, 133.0, 132.3, 129.6, 129.4, 128.5, 128.3, 128.0, 127.4, 127.1, 125.4, 124.8, 122.2, 122.2, 92.7, 91.1, 31.4, 23.1; IR (KBr, cm<sup>-1</sup>) 3059, 2961, 2866, 2212, 1952, 1595, 1474, 1362, 1078; HRMS (ESI) *m/z*: [M + H]<sup>+</sup> calcd for C<sub>23</sub>H<sub>21</sub> 297.1638, found 297.1641.

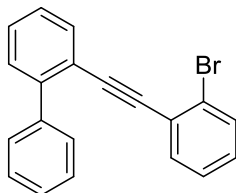

**2-((2-Bromophenyl)ethynyl)-1,1'-biphenyl (1i).**<sup>17</sup> Colorless oil; 268 mg, 81% yield; <sup>1</sup>H NMR (400 MHz, CDCl<sub>3</sub>) δ 7.74 (d, *J* = 7.6 Hz, 1H), 7.69 (d, *J* = 7.2 Hz, 2H), 7.56 (d, *J* = 8.0 Hz, 1H), 7.48–7.32 (m, 7H), 7.22 (t, *J* = 7.0 Hz, 1H), 7.13 (td, *J* = 8.0, 1.6 Hz, 1H).

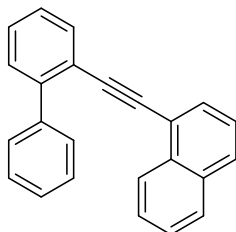

**1-((1,1'-Biphenyl)-2-ylethynyl)naphthalene (1j).**<sup>8</sup> Colorless oil; 257 mg, 85% yield; <sup>1</sup>H NMR (400 MHz, CDCl<sub>3</sub>) δ 7.86 (d, *J* = 8.4 Hz, 1H), 7.81 (t, *J* = 8.4 Hz, 3H), 7.72 (d, *J* = 6.8 Hz, 2H), 7.62 (d, *J* = 7.2 Hz, 1H), 7.53–7.38 (m, 9H).

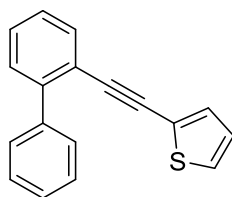

**2-([1,1'-Biphenyl]-2-ylethynyl)thiophene (1k).**<sup>8</sup> Colorless oil; 187 mg, 72% yield; <sup>1</sup>H NMR (400 MHz, CDCl<sub>3</sub>)  $\delta$  7.67–7.62 (m, 3H), 7.48–7.39 (m, 5H), 7.33 (td,  $J$  = 7.2, 1.6 Hz, 1H), 7.24 (dd,  $J$  = 5.2, 1.2 Hz, 1H), 7.11 (d,  $J$  = 3.6 Hz, 1H), 6.96 (dd,  $J$  = 5.2, 3.6 Hz, 1H).

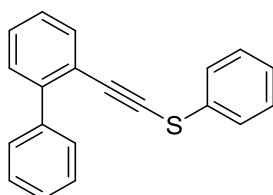

**([1,1'-Biphenyl]-2-ylethynyl)(phenyl)sulfane (1l).**<sup>9</sup> Yellow oil; 285 mg, 80% yield; <sup>1</sup>H NMR (400 MHz, CDCl<sub>3</sub>)  $\delta$  7.61 (d,  $J$  = 8.0 Hz, 3H), 7.46–7.38 (m, 5H), 7.36–7.32 (m, 1H), 7.25–7.17 (m, 5H).

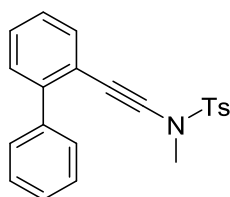

**N-([1,1'-Biphenyl]-2-ylethynyl)-N,4-dimethylbenzenesulfonamide (1m).**<sup>11</sup> Yellow oil; 368 mg, 68% yield; <sup>1</sup>H NMR (400 MHz, CDCl<sub>3</sub>)  $\delta$  7.54 (d,  $J$  = 7.2 Hz, 2H), 7.51 (d,  $J$  = 8.4 Hz, 2H), 7.46 (d,  $J$  = 8.4 Hz, 1H), 7.41 (t,  $J$  = 7.2 Hz, 2H), 7.36–7.26 (m, 4H), 7.21 (d,  $J$  = 8.0 Hz, 2H), 2.98 (s, 3H), 2.40 (s, 3H).

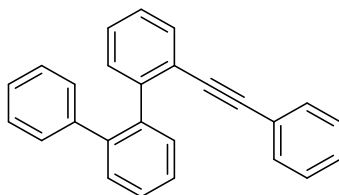

**2-(Phenylethynyl)-1,1':2',1''-terphenyl (1n).**<sup>7</sup> Yellow solid; 459 mg, 70% yield; mp: 75–76 °C (lit. 77.7–78.0 °C); <sup>1</sup>H NMR (400 MHz, CDCl<sub>3</sub>)  $\delta$  7.51–7.40 (m, 5H), 7.25–7.14 (m, 12H), 7.08 (d,  $J$  = 8.0 Hz, 1H).

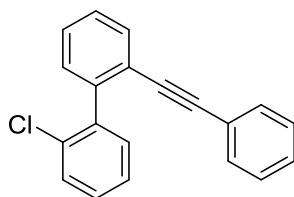

**2-Chloro-2'-(phenylethynyl)-1,1'-biphenyl (1o).** Yellow oil; 430 mg, 75% yield;  $^1\text{H}$  NMR (400 MHz,  $\text{CDCl}_3$ )  $\delta$  7.63 (dd,  $J = 6.2, 2.7$  Hz, 1H), 7.51–7.49 (ddd,  $J = 8.1, 6.7, 3.8$  Hz, 1H), 7.42–7.37 (m, 3H), 7.35–7.32 (m, 3H), 7.24–7.21 (m, 3H), 7.18–7.16 (m, 2H);  $^{13}\text{C}$  NMR (100 MHz,  $\text{CDCl}_3$ )  $\delta$  142.1, 139.7, 133.5, 131.8, 131.7, 131.4, 129.8, 129.4, 128.9, 128.2, 128.1, 128.0, 127.8, 126.3, 123.3, 123.1, 92.7, 88.5; IR (KBr,  $\text{cm}^{-1}$ ) 3059, 2924, 2853, 2218, 1923, 1809, 1697, 1597, 1497, 1437, 1070, 1036; HRMS (ESI)  $m/z$ :  $[\text{M} + \text{H}]^+$  calcd for  $\text{C}_{20}\text{H}_{14}\text{Cl}$  289.0779, found 289.0779.

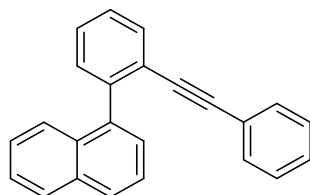

**1-(2-(Phenylethynyl)phenyl)naphthalene (1p).**<sup>20</sup> Brown oil; 490 mg, 81% yield;  $^1\text{H}$  NMR (400 MHz,  $\text{CDCl}_3$ )  $\delta$  7.94 (t,  $J = 8.2$  Hz, 2H), 7.73 (t,  $J = 8.0$  Hz, 2H), 7.58 (t,  $J = 7.4$  Hz, 1H), 7.54–7.41 (m, 6H), 7.19–7.10 (m, 3H), 6.81 (d,  $J = 8.0$  Hz, 2H).

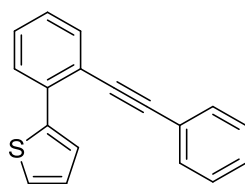

**2-(2-(Phenylethynyl)phenyl)thiophene (1q).**<sup>20</sup> Yellow oil; 379 mg, 73% yield;  $^1\text{H}$  NMR (400 MHz,  $\text{CDCl}_3$ )  $\delta$  7.66–7.60 (m, 3H), 7.53–7.51 (m, 2H), 7.40–7.35 (m, 5H), 7.29 (td,  $J = 7.2, 1.2$  Hz, 1H), 7.14 (dd,  $J = 4.8, 3.6$  Hz, 1H).

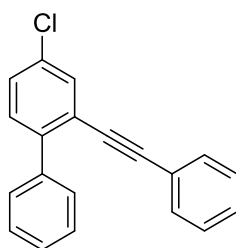

**4-Chloro-2-(phenylethynyl)-1,1'-biphenyl (1r).**<sup>7</sup> Yellow oil; 402 mg, 70% yield;  $^1\text{H}$  NMR (400 MHz,  $\text{CDCl}_3$ )  $\delta$  7.65 (d,  $J = 6.0$  Hz, 3H), 7.50–7.40 (m, 3H), 7.37 (s, 2H), 7.36–7.32 (m, 5H).

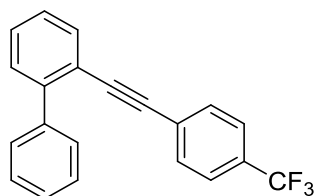



**2-((4-(Trifluoromethyl)phenyl)ethynyl)-1,1'-biphenyl (1s).**<sup>8</sup> Colorless oil; 270 mg, 84% yield; <sup>1</sup>H NMR (400 MHz, CDCl<sub>3</sub>)  $\delta$  7.68 (t,  $J$  = 6.4 Hz, 3H), 7.56 (d,  $J$  = 8.4 Hz, 2H), 7.51–7.41 (m, 7H), 7.39–7.35 (m, 1H).

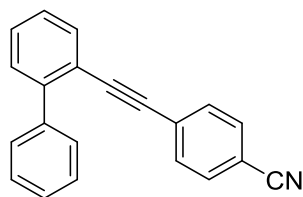

**4-([1,1'-Biphenyl]-2-ylethynyl)benzonitrile (1t).**<sup>8</sup> White solid; 220 mg, 79% yield; mp: 79–80 °C; <sup>1</sup>H NMR (400 MHz, CDCl<sub>3</sub>)  $\delta$  7.66 (d,  $J$  = 7.6 Hz, 1H), 7.62 (d,  $J$  = 6.8 Hz, 2H), 7.56 (d,  $J$  = 8.8 Hz, 2H), 7.49–7.36 (m, 8H).

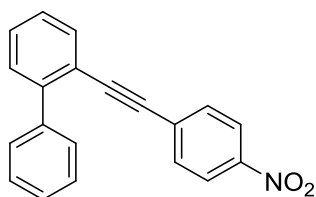

**2-((4-Nitrophenyl)ethynyl)-1,1'-biphenyl (1u).**<sup>7</sup> Yellow solid; 248 mg, 83% yield; mp: 99–100 °C (lit. 100–101 °C); <sup>1</sup>H NMR (400 MHz, CDCl<sub>3</sub>)  $\delta$  8.15 (d,  $J$  = 8.8 Hz, 2H), 7.67 (d,  $J$  = 7.6 Hz, 1H), 7.63 (d,  $J$  = 6.8 Hz, 2H), 7.50–7.36 (m, 8H).

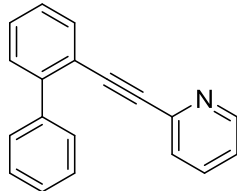

**2-([1,1'-Biphenyl]-2-ylethynyl)pyridine (1v).**<sup>18</sup> Yellow oil; 158 mg, 62% yield; <sup>1</sup>H NMR (400 MHz, CDCl<sub>3</sub>)  $\delta$  8.57 (d,  $J$  = 4.4 Hz, 1H), 7.75 (d,  $J$  = 7.6 Hz, 1H), 7.67 (d,  $J$  = 6.8 Hz, 2H), 7.58 (t,  $J$  = 7.8 Hz, 1H), 7.48–7.33 (m, 6H), 7.18 (d,  $J$  = 8.0 Hz, 2H).

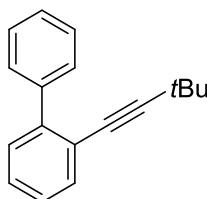

**2-(3,3-Dimethylbut-1-yn-1-yl)-1,1'-biphenyl (1w).**<sup>7</sup> Colorless oil; 252 mg, 60% yield; <sup>1</sup>H NMR (400 MHz, CDCl<sub>3</sub>)  $\delta$  7.59 (d,  $J$  = 6.2 Hz, 2H), 7.48 (d,  $J$  = 6.1 Hz, 1H), 7.40–7.23 (m, 6H), 1.17 (s, 9H).

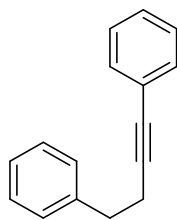

**But-1-yne-1,4-diyl dibenzene (4a).**<sup>12</sup> Colorless oil; 195 mg, 95% yield; <sup>1</sup>H NMR (400 MHz, CDCl<sub>3</sub>)  $\delta$  7.38–7.36 (m, 2H), 7.33–7.22 (m, 8H), 2.92 (t,  $J = 7.6$  Hz, 2H), 2.69 (t,  $J = 7.6$  Hz, 2H).

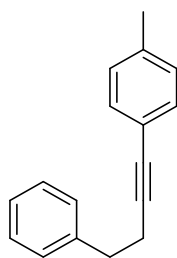

**1-Methyl-4-(4-phenylbut-1-yn-1-yl)benzene (4b).**<sup>19</sup> Colorless oil; 202 mg, 92% yield; <sup>1</sup>H NMR (400 MHz, CDCl<sub>3</sub>)  $\delta$  7.37–7.28 (m, 7H), 7.12 (d,  $J = 8.0$  Hz, 2H), 2.96 (t,  $J = 7.6$  Hz, 2H), 2.72 (t,  $J = 7.6$  Hz, 2H), 2.36 (s, 3H).

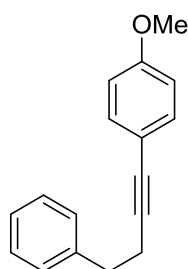

**1-Methoxy-4-(4-phenylbut-1-yn-1-yl)benzene (4c).**<sup>12</sup> Yellow oil; 219 mg, 93% yield; <sup>1</sup>H NMR (400 MHz, CDCl<sub>3</sub>)  $\delta$  7.34–7.23 (m, 7H), 6.82 (d,  $J = 9.2$  Hz, 2H), 3.80 (s, 3H), 2.93 (t,  $J = 7.6$  Hz, 2H), 2.69 (t,  $J = 7.6$  Hz, 2H).

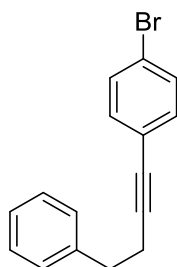

**1-Bromo-4-(4-phenylbut-1-yn-1-yl)benzene (4d).**<sup>19</sup> Colorless oil; 235 mg, 83% yield; <sup>1</sup>H NMR (400 MHz, CDCl<sub>3</sub>)  $\delta$  7.40 (d,  $J = 8.4$  Hz, 2H), 7.33–7.20 (m, 7H), 2.91 (t,  $J = 7.6$  Hz, 2H), 2.68 (t,  $J = 7.6$  Hz, 2H).

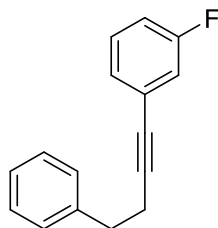

**1-Fluoro-3-(4-phenylbut-1-yn-1-yl)benzene (4e).**<sup>19</sup> Colorless oil; 179 mg, 80% yield; <sup>1</sup>H NMR (400 MHz, CDCl<sub>3</sub>)  $\delta$  7.31–7.15 (m, 6H), 7.12 (d,  $J$  = 6.8 Hz, 1H), 7.04 (d,  $J$  = 8.8 Hz, 1H), 6.95–6.92 (m, 1H), 2.89 (t,  $J$  = 7.6 Hz, 2H), 2.66 (t,  $J$  = 7.6 Hz, 2H).

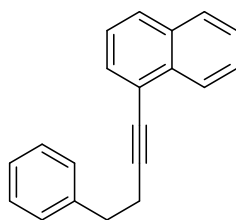

**1-(4-Phenylbut-1-yn-1-yl)naphthalene (4f).**<sup>12</sup> White solid; 220 mg, 86% yield; mp: 45–46 °C (lit. 49–51 °C); <sup>1</sup>H NMR (400 MHz, CDCl<sub>3</sub>)  $\delta$  8.18–8.16 (m, 1H), 7.84–7.81 (m, 1H), 7.78 (d,  $J$  = 8.0 Hz, 1H), 7.60 (d,  $J$  = 7.2 Hz, 1H), 7.51–7.49 (m, 2H), 7.39 (t,  $J$  = 7.6 Hz, 1H), 7.36 (d,  $J$  = 4.4 Hz, 4H), 7.28 (t,  $J$  = 4.2 Hz, 1H), 3.04 (t,  $J$  = 7.2 Hz, 2H), 2.89 (t,  $J$  = 7.2 Hz, 2H).

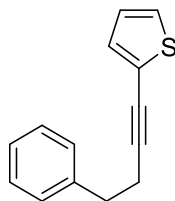

**2-(4-Phenylbut-1-yn-1-yl)thiophene (4g).**<sup>12</sup> Yellow oil; 169 mg, 80% yield; <sup>1</sup>H NMR (400 MHz, CDCl<sub>3</sub>)  $\delta$  7.32–7.20 (m, 5H), 7.15 (dd,  $J$  = 5.2, 0.8 Hz, 1H), 7.10 (d,  $J$  = 3.2 Hz, 1H), 6.92 (dd,  $J$  = 5.2, 3.8 Hz, 1H), 2.91 (t,  $J$  = 7.6 Hz, 2H), 2.70 (t,  $J$  = 7.6 Hz, 2H).

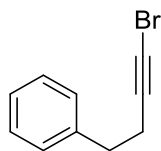

**(4-Bromobut-3-yn-1-yl)benzene (4h).**<sup>13</sup> Colorless oil; 197 mg, 95% yield; <sup>1</sup>H NMR (400 MHz, CDCl<sub>3</sub>)  $\delta$  7.29 (t,  $J$  = 7.2 Hz, 2H), 7.23–7.18 (m, 3H), 2.82 (t,  $J$  = 7.6 Hz, 2H), 2.48 (t,  $J$  = 7.6 Hz, 2H).

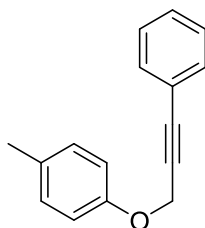

**1-Methyl-4-((3-phenylprop-2-yn-1-yl)oxy)benzene (4i).**<sup>14</sup> White solid; 362 mg, 82% yield; mp: 59–60 °C; <sup>1</sup>H NMR (400 MHz, CDCl<sub>3</sub>)  $\delta$  7.46–7.44 (m, 2H), 7.32–7.31 (m, 3H), 7.13 (d,  $J$  = 8.4 Hz, 2H), 6.95 (d,  $J$  = 8.8 Hz, 2H), 4.90 (s, 2H), 2.32 (s, 3H).

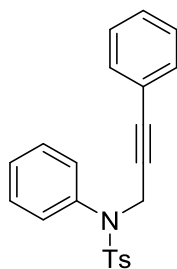

**4-Methyl-N-phenyl-N-(3-phenylprop-2-yn-1-yl)benzenesulfonamide (4j).**<sup>13</sup> White solid; 524 mg, 73% yield; mp: 90–91 °C (lit. 90–92 °C); <sup>1</sup>H NMR (400 MHz, CDCl<sub>3</sub>)  $\delta$  7.59 (d,  $J$  = 8.4 Hz, 2H), 7.32 (s, 5H), 7.30–7.23 (m, 3H), 7.19–7.16 (m, 4H), 4.66 (s, 2H), 2.36 (s, 3H).

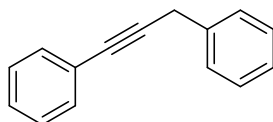

**Prop-1-yne-1,3-diyl dibenzene (6).**<sup>16</sup> Colorless oil; 326 mg, 85% yield; <sup>1</sup>H NMR (400 MHz, CDCl<sub>3</sub>)  $\delta$  7.46–7.41 (m, 4H), 7.35–7.23 (m, 6H), 3.83 (s, 2H).

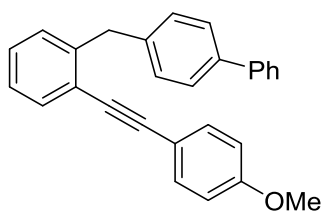

**4-(2-((4-Methoxyphenyl)ethynyl)benzyl)-1,1'-biphenyl (8).**<sup>9</sup> White solid; 386 mg, 74% yield; mp: 94–95 °C; <sup>1</sup>H NMR (400 MHz, CDCl<sub>3</sub>)  $\delta$  7.57–7.50 (m, 5H), 7.43–7.39 (m, 4H), 7.35–7.29 (m, 3H), 7.25–7.18 (m, 3H), 6.86 (d,  $J$  = 8.9 Hz, 2H), 4.27 (s, 2H), 3.81 (s, 3H).

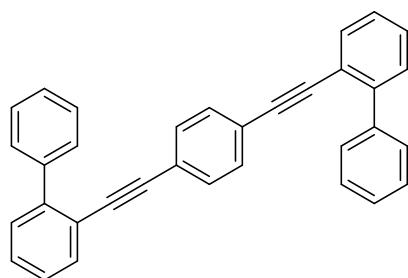

**1,4-Bis([1,1'-biphenyl]-2-ylethynyl)benzene (10).**<sup>8</sup> Yellow solid; 165 mg, 77% yield; mp: 159–160 °C (lit. 163–164 °C); <sup>1</sup>H NMR (400 MHz, CDCl<sub>3</sub>)  $\delta$  7.66–7.62 (m, 6H), 7.47–7.39 (m, 10H), 7.35–7.31 (m, 2H), 7.22 (s, 4H).

### 3. General procedure for the synthesis of the desired products

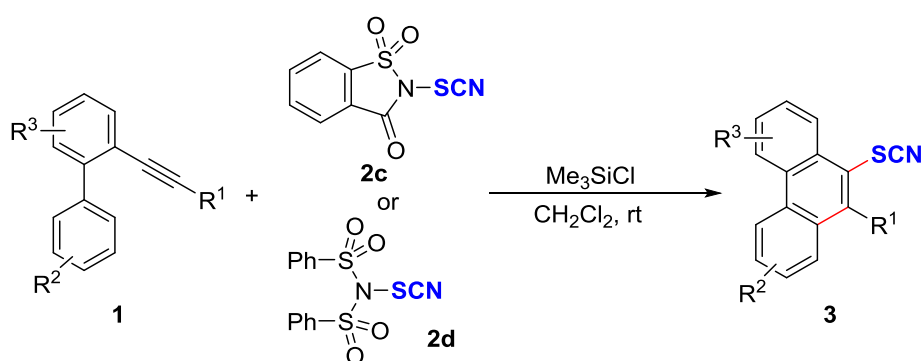

**General Procedure for the Synthesis of 3.** To a 25 mL Schlenk tube containing **1** (0.1 mmol, 1.0 equiv) was added CH<sub>2</sub>Cl<sub>2</sub> (1.0 mL) under an argon atmosphere. Then, **2c** (0.2 mmol, 2.0 equiv) or **2d** (0.3 mmol, 3.0 equiv) was added. Subsequently, the mixture was added acid and stirred at room temperature for an appropriate time. When the reaction was completed, the product was purified by column chromatography on silica gel with petroleum ether/ethyl acetate to afford the product **3**.

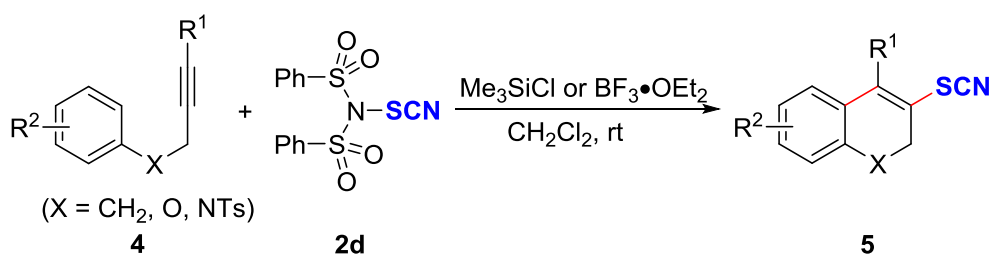

**General Procedure for the Synthesis of 5 and 9.** To a 25 mL Schlenk tube containing **4** and **8** (0.1 mmol, 1.0 equiv) was added dichloromethane (1.0 mL) under an argon atmosphere. Then **2d** (0.3 mmol, 3.0 equiv) was added. Subsequently, the mixture was added acid (0.12 mmol, 1.2 equiv) and stirred at room temperature for an appropriate time. When the reaction was completed, the product was purified by column chromatography on silica gel with petroleum ether/ethyl acetate to afford the

products **5** and **9**.

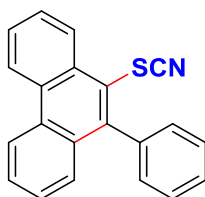

**9-Phenyl-10-thiocyanatophenanthrene (3a).** White solid; 28.3 mg, 91% yield; Eluent PE/EtOAc (50:1, v/v), TLC  $R_f$  = 0.40; mp: 211–212 °C;  $^1\text{H}$  NMR (400 MHz,  $\text{CDCl}_3$ )  $\delta$  8.81 (d,  $J$  = 7.6 Hz, 1H), 8.77 (d,  $J$  = 8.4 Hz, 1H), 8.64 (d,  $J$  = 7.6 Hz, 1H), 7.85–7.73 (m, 3H), 7.61–7.48 (m, 5H), 7.38 (d,  $J$  = 7.6 Hz, 2H);  $^{13}\text{C}$  NMR (100 MHz,  $\text{CDCl}_3$ )  $\delta$  147.6, 139.0, 131.8, 131.5, 131.2, 130.4, 129.7, 129.1, 128.8, 128.6, 128.4, 128.3, 127.9, 127.3, 126.8, 123.2, 122.8, 119.4, 111.3 (SCN); IR (KBr,  $\text{cm}^{-1}$ ) 2995, 2151 (SCN), 1647, 1508, 1456; HRMS (ESI)  $m/z$ :  $[\text{M} + \text{H}]^+$  calcd for  $\text{C}_{21}\text{H}_{14}\text{NS}$  312.0841, found 312.0847.

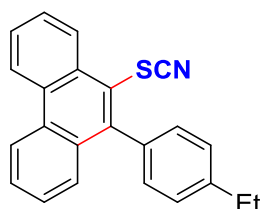

**9-(4-Ethylphenyl)-10-thiocyanatophenanthrene (3b).** White solid; 32.2 mg, 95% yield; Eluent PE/EtOAc (50:1, v/v), TLC  $R_f$  = 0.40; mp: 126–127 °C;  $^1\text{H}$  NMR (400 MHz,  $\text{CDCl}_3$ )  $\delta$  8.70 (d,  $J$  = 8.4 Hz, 1H), 8.67 (d,  $J$  = 8.4 Hz, 1H), 8.55 (d,  $J$  = 7.6 Hz, 1H), 7.75–7.63 (m, 3H), 7.45–7.40 (m, 2H), 7.33 (d,  $J$  = 8.0 Hz, 2H), 7.19 (d,  $J$  = 8.0 Hz, 2H), 2.74 (q,  $J$  = 7.6 Hz, 2H), 1.30 (t,  $J$  = 7.6 Hz, 3H);  $^{13}\text{C}$  NMR (100 MHz,  $\text{CDCl}_3$ )  $\delta$  147.8, 144.4, 136.2, 132.0, 131.5, 131.2, 130.5, 129.7, 129.2, 128.8, 128.2, 128.1, 127.8, 127.2, 126.8, 123.2, 122.7, 119.5, 111.4 (SCN), 28.8, 15.4; IR (KBr,  $\text{cm}^{-1}$ ) 2961, 2924, 2149 (SCN), 1645, 1531, 1456; HRMS (ESI)  $m/z$ :  $[\text{M} + \text{H}]^+$  calcd for  $\text{C}_{23}\text{H}_{18}\text{NS}$  340.1154, found 340.1151.

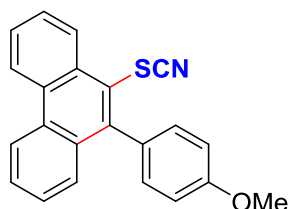

**9-(4-Methoxyphenyl)-10-thiocyanatophenanthrene (3c).** White solid; 33.0 mg, 97% yield; Eluent PE/EtOAc (50:1, v/v), TLC  $R_f$  = 0.20; mp: 182–183 °C;  $^1\text{H}$  NMR (400 MHz,  $\text{CDCl}_3$ )  $\delta$  8.79 (d,  $J$  = 7.6 Hz, 1H), 8.76 (d,  $J$  = 8.4 Hz, 1H), 8.63 (d,  $J$  = 7.6 Hz, 1H), 7.83–7.71 (m, 3H), 7.56–7.49 (m, 2H), 7.29 (d,  $J$  = 8.8 Hz, 2H), 7.11 (d,  $J$  = 8.8

Hz, 2H), 3.94 (s, 3H);  $^{13}\text{C}$  NMR (175 MHz,  $\text{CDCl}_3$ )  $\delta$  159.6, 147.4, 132.2, 131.5, 131.2, 131.2, 131.0, 130.5, 129.2, 128.8, 128.3, 127.8, 127.3, 126.9, 123.2, 122.8, 119.9, 114.0, 111.4 (SCN), 55.4; IR (KBr,  $\text{cm}^{-1}$ ) 3061, 2928, 2837, 2154 (SCN), 1605, 1508, 1460, 1252, 1175, 1030; HRMS (ESI)  $m/z$ :  $[\text{M} + \text{H}]^+$  calcd for  $\text{C}_{22}\text{H}_{16}\text{NOS}$  342.0947, found 342.0943.

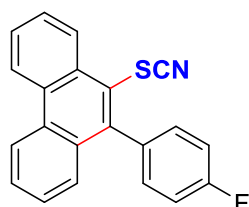

**9-(4-Fluorophenyl)-10-thiocyanatophenanthrene (3d).** Yellow solid; 26.9 mg, 82% yield; Eluent PE/EtOAc (50:1, v/v), TLC  $R_f$  = 0.38; mp: 212–213 °C;  $^1\text{H}$  NMR (400 MHz,  $\text{CDCl}_3$ )  $\delta$  8.82–8.77 (m, 2H), 8.65–8.63 (m, 1H), 7.85–7.74 (m, 3H), 7.54 (t,  $J$  = 7.4 Hz, 1H), 7.47 (d,  $J$  = 8.0 Hz, 1H), 7.37–7.34 (m, 2H), 7.29 (t,  $J$  = 8.8 Hz, 2H);  $^{13}\text{C}$  NMR (100 MHz,  $\text{CDCl}_3$ )  $\delta$  162.7 (d,  $J$  = 248.1 Hz), 146.6, 134.8 (d,  $J$  = 3.6 Hz), 131.8, 131.6, 131.5 (d,  $J$  = 8.1 Hz), 131.2, 130.3, 129.0, 128.9, 128.4, 128.1, 127.4, 126.9, 123.2, 122.9, 119.9, 115.8 (d,  $J$  = 21.7 Hz), 111.1 (SCN); IR (KBr,  $\text{cm}^{-1}$ ) 3065, 2154 (SCN), 1697, 1506, 1456, 1339; HRMS (ESI)  $m/z$ :  $[\text{M} + \text{H}]^+$  calcd for  $\text{C}_{21}\text{H}_{13}\text{FNS}$  330.0747, found 330.0748.

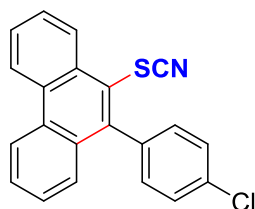

**9-(4-Chlorophenyl)-10-thiocyanatophenanthrene (3e).** Yellow solid; 19.0 mg, 55% yield; Eluent PE/EtOAc (50:1, v/v), TLC  $R_f$  = 0.38; mp: 185–186 °C;  $^1\text{H}$  NMR (400 MHz,  $\text{CDCl}_3$ )  $\delta$  8.82–8.77 (m, 2H), 8.66–8.63 (m, 1H), 7.85–7.75 (m, 3H), 7.59–7.52 (m, 3H), 7.46 (dd,  $J$  = 8.0, 0.8 Hz, 1H), 7.33 (d,  $J$  = 8.4 Hz, 2H);  $^{13}\text{C}$  NMR (175 MHz,  $\text{CDCl}_3$ )  $\delta$  146.4, 137.3, 134.6, 131.6, 131.5, 131.3, 131.1, 130.3, 129.0, 129.0, 128.8, 128.4, 128.1, 127.5, 126.9, 123.3, 122.9, 119.7, 111.0 (SCN); IR (KBr,  $\text{cm}^{-1}$ ) 2922, 2153 (SCN), 1682, 1487, 1393; HRMS (ESI)  $m/z$ :  $[\text{M} + \text{H}]^+$  calcd for  $\text{C}_{21}\text{H}_{13}\text{ClNS}$  346.0452, found 346.0456.

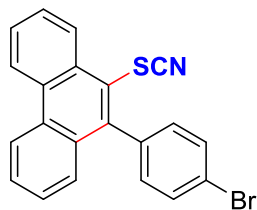

**9-(4-Bromophenyl)-10-thiocyanatophenanthrene (3f).** Yellow solid; 29.2 mg, 75% yield; Eluent PE/EtOAc (50:1, v/v), TLC  $R_f$  = 0.38; mp: 177–178 °C;  $^1\text{H}$  NMR (400 MHz,  $\text{CDCl}_3$ )  $\delta$  8.81–8.76 (m, 2H), 8.65–8.63 (m, 1H), 7.84–7.72 (m, 5H), 7.53 (t,  $J$  = 7.2 Hz, 1H), 7.46 (d,  $J$  = 7.2 Hz, 1H), 7.26 (d,  $J$  = 8.8 Hz, 2H);  $^{13}\text{C}$  NMR (100 MHz,  $\text{CDCl}_3$ )  $\delta$  138.5, 136.7, 132.4, 132.1, 132.0, 130.7, 130.1, 129.4, 129.3, 129.3, 128.9, 128.3, 128.2, 127.9, 127.2, 126.2, 123.4, 123.1, 110.7 (SCN); IR (KBr,  $\text{cm}^{-1}$ ) 2922, 2153 (SCN), 1645, 1487, 1261; HRMS (ESI)  $m/z$ :  $[\text{M} + \text{H}]^+$  calcd for  $\text{C}_{21}\text{H}_{13}\text{BrNS}$  389.9947, found 389.9942.

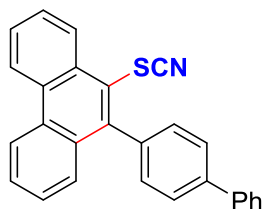

**9-([1,1'-Biphenyl]-4-yl)-10-thiocyanatophenanthrene (3g).** Yellow solid; 34.8 mg, 90% yield; Eluent PE/EtOAc (50:1, v/v), TLC  $R_f$  = 0.30; mp: 216–218 °C;  $^1\text{H}$  NMR (400 MHz,  $\text{CDCl}_3$ )  $\delta$  8.83–8.78 (m, 2H), 8.66 (d,  $J$  = 7.6 Hz, 1H), 7.86–7.74 (m, 7H), 7.59–7.39 (m, 7H);  $^{13}\text{C}$  NMR (100 MHz,  $\text{CDCl}_3$ )  $\delta$  147.4, 141.2, 140.4, 137.9, 131.8, 131.6, 131.2, 130.4, 130.2, 129.1, 128.9, 128.9, 128.3, 127.9, 127.7, 127.3, 127.3, 127.2, 126.9, 123.2, 122.8, 119.5, 111.3 (SCN); IR (KBr,  $\text{cm}^{-1}$ ) 2916, 2149 (SCN), 1697, 1485, 1445; HRMS (ESI)  $m/z$ :  $[\text{M} + \text{H}]^+$  calcd for  $\text{C}_{27}\text{H}_{18}\text{NS}$  388.1154, found 388.1161.

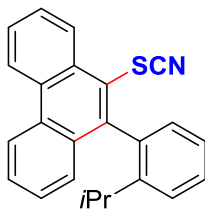

**9-(2-Isopropylphenyl)-10-thiocyanatophenanthrene (3h).** White solid; 27.8 mg, 79% yield; Eluent PE/EtOAc (50:1, v/v), TLC  $R_f$  = 0.40; mp: 105–107 °C;  $^1\text{H}$  NMR (400 MHz,  $\text{CDCl}_3$ )  $\delta$  8.82 (d,  $J$  = 8.0 Hz, 1H), 8.78 (d,  $J$  = 8.4 Hz, 1H), 8.63 (d,  $J$  = 8.0 Hz, 1H), 7.86–7.80 (m, 2H), 7.75 (t,  $J$  = 7.6 Hz, 1H), 7.56 (d,  $J$  = 4.4 Hz, 2H), 7.51 (t,  $J$  = 7.6 Hz, 1H), 7.40–7.35 (m, 2H), 7.17 (d,  $J$  = 7.6 Hz, 1H), 2.44 (septet,  $J$  = 6.7 Hz, 1H),



1.17 (d,  $J = 6.8$  Hz, 3H), 0.99 (d,  $J = 5.6$  Hz, 3H);  $^{13}\text{C}$  NMR (100 MHz,  $\text{CDCl}_3$ )  $\delta$  147.1, 146.9, 137.1, 131.9, 131.5, 131.3, 130.2, 129.8, 129.2, 129.0, 128.9, 128.3, 127.9, 127.3, 126.8, 126.1, 126.1, 123.3, 122.8, 119.7, 110.9 (SCN), 30.7, 24.1; IR (KBr,  $\text{cm}^{-1}$ ) 3067, 2963, 2153 (SCN), 1487, 1447, 1364, 1265, 1157; HRMS (ESI)  $m/z$ :  $[\text{M} + \text{H}]^+$  calcd for  $\text{C}_{24}\text{H}_{20}\text{NS}$  354.1311, found 354.1312.

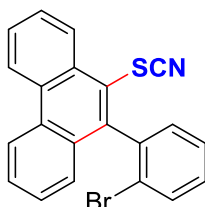

**9-(2-Bromophenyl)-10-thiocyanatophenanthrene (3i).** Yellow oil; 20.6 mg, 53% yield; Eluent PE/EtOAc (50:1, v/v), TLC  $R_f = 0.30$ ;  $^1\text{H}$  NMR (400 MHz,  $\text{CDCl}_3$ )  $\delta$  8.87–8.82 (m, 2H), 8.69 (d,  $J = 8.8$  Hz, 1H), 7.88–7.85 (m, 3H), 7.80 (t,  $J = 7.6$  Hz, 1H), 7.58 (dd,  $J = 12.8, 6.8$  Hz, 2H), 7.50–7.38 (m, 3H);  $^{13}\text{C}$  NMR (100 MHz,  $\text{CDCl}_3$ )  $\delta$  146.2, 139.7, 133.0, 131.7, 131.4, 130.8, 130.3, 130.2, 129.0, 128.3, 128.2, 127.8, 127.6, 126.9, 124.2, 123.3, 123.0, 119.8, 110.6 (SCN); IR (KBr,  $\text{cm}^{-1}$ ) 3063, 2922, 2156 (SCN), 1472, 1447, 1263, 1188; HRMS (ESI)  $m/z$ :  $[\text{M} + \text{H}]^+$  calcd for  $\text{C}_{21}\text{H}_{13}\text{BrNS}$  389.9947, found 389.9951.

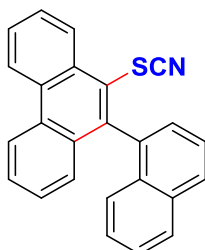

**9-(Naphthalen-1-yl)-10-thiocyanatophenanthrene (3j).** White solid; 28.1 mg, 78% yield; Eluent PE/EtOAc (50:1, v/v), TLC  $R_f = 0.30$ ; mp: 206–207 °C;  $^1\text{H}$  NMR (400 MHz,  $\text{CDCl}_3$ )  $\delta$  8.92–8.89 (m, 1H), 8.85 (d,  $J = 8.4$  Hz, 1H), 8.71–8.69 (m, 1H), 8.10 (d,  $J = 8.4$  Hz, 1H), 8.04 (d,  $J = 8.4$  Hz, 1H), 7.90–7.88 (m, 2H), 7.79–7.70 (m, 2H), 7.57–7.52 (m, 2H), 7.44 (t,  $J = 7.6$  Hz, 1H), 7.37–7.32 (m, 2H), 7.25 (d,  $J = 8.4$  Hz, 1H);  $^{13}\text{C}$  NMR (100 MHz,  $\text{CDCl}_3$ )  $\delta$  145.8, 136.4, 133.6, 132.2, 132.0, 131.6, 131.5, 130.4, 129.1, 129.0, 128.5, 128.4, 128.1, 128.0, 127.5, 127.0, 126.8, 126.4, 125.5, 125.5, 123.3, 122.8, 120.7, 111.1 (SCN); IR (KBr,  $\text{cm}^{-1}$ ) 3055, 2924, 2153 (SCN), 1717, 1506, 1456, 1339, 1263; HRMS (ESI)  $m/z$ :  $[\text{M} + \text{H}]^+$  calcd for  $\text{C}_{25}\text{H}_{16}\text{NS}$  362.0998, found 362.0991.

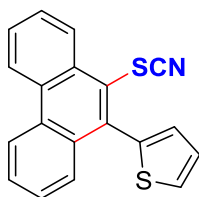

**2-(10-Thiocyanatophenanthren-9-yl)thiophene (3k).** White solid; 25.6 mg, 81% yield; Eluent PE/EtOAc (50:1, v/v), TLC  $R_f$  = 0.35; mp: 190–192 °C;  $^1\text{H}$  NMR (400 MHz,  $\text{CDCl}_3$ )  $\delta$  8.80–8.77 (m, 1H), 8.75 (d,  $J$  = 8.0 Hz, 1H), 8.65–8.62 (m, 1H), 7.84–7.79 (m, 2H), 7.78–7.73 (m, 1H), 7.70 (d,  $J$  = 8.4 Hz, 1H), 7.61 (dd,  $J$  = 5.0, 1.0 Hz, 1H), 7.59–7.55 (m, 1H), 7.28 (dd,  $J$  = 5.0, 3.4 Hz, 1H), 7.19 (dd,  $J$  = 3.6, 1.2 Hz, 1H);  $^{13}\text{C}$  NMR (100 MHz,  $\text{CDCl}_3$ )  $\delta$  147.1, 139.1, 134.6, 132.8, 131.5, 131.2, 130.4, 129.7, 129.1, 128.8, 128.7, 128.6, 128.5, 127.9, 126.9, 126.6, 126.5, 121.2, 110.8 (SCN); IR (KBr,  $\text{cm}^{-1}$ ) 2920, 2149 (SCN), 1647, 1541, 1506, 1456, 1339; HRMS (ESI)  $m/z$ :  $[\text{M} + \text{H}]^+$  calcd for  $\text{C}_{19}\text{H}_{12}\text{NS}_2$  318.0406, found 318.0398.

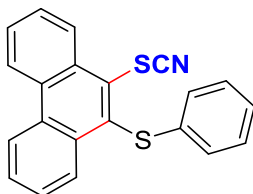

**Phenyl(10-thiocyanatophenanthren-9-yl)sulfane (3l).** White solid; 33.8 mg, 99% yield; Eluent PE/EtOAc (50:1, v/v), TLC  $R_f$  = 0.20; mp: 169–170 °C;  $^1\text{H}$  NMR (400 MHz,  $\text{CDCl}_3$ )  $\delta$  8.76–8.74 (m, 1H), 8.71 (d,  $J$  = 8.4 Hz, 2H), 8.63–8.61 (m, 1H), 7.81–7.79 (m, 2H), 7.74 (t,  $J$  = 7.6 Hz, 1H), 7.61 (t,  $J$  = 7.8 Hz, 1H), 7.18 (t,  $J$  = 7.4 Hz, 2H), 7.13–7.05 (m, 3H);  $^{13}\text{C}$  NMR (100 MHz,  $\text{CDCl}_3$ )  $\delta$  146.3, 137.8, 131.9, 131.6, 131.5, 131.4, 131.3, 130.3, 129.0, 128.8, 128.4, 128.1, 127.4, 126.8, 123.2, 122.9, 122.7, 119.6, 110.9 (SCN); IR (KBr,  $\text{cm}^{-1}$ ) 2922, 2153 (SCN), 1647, 1558, 1456, 1339; HRMS (ESI)  $m/z$ :  $[\text{M} + \text{H}]^+$  calcd for  $\text{C}_{21}\text{H}_{14}\text{NS}_2$  344.0562, found 344.0562.

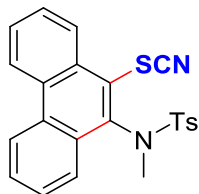

***N*,4-Dimethyl-*N*-(10-thiocyanatophenanthren-9-yl)benzenesulfonamide (3m).** White solid; 16.6 mg, 40% yield; Eluent PE/EtOAc (10:1, v/v), TLC  $R_f$  = 0.30; mp: 204–205 °C;  $^1\text{H}$  NMR (400 MHz,  $\text{CDCl}_3$ )  $\delta$  8.67 (t,  $J$  = 9.6 Hz, 2H), 8.51–8.49 (m, 1H), 7.77–7.74 (m, 2H), 7.66 (t,  $J$  = 7.0 Hz, 1H), 7.57 (d,  $J$  = 8.0 Hz, 2H), 7.50 (d,  $J$  = 8.0 Hz, 1H), 7.40 (t,  $J$  = 7.6 Hz, 1H), 7.23 (d,  $J$  = 8.0 Hz, 2H), 3.46 (s, 3H), 2.40 (s, 3H);  $^{13}\text{C}$  NMR (100 MHz,  $\text{CDCl}_3$ )  $\delta$  144.1, 141.4, 136.6, 132.9, 131.3, 130.1, 129.9, 129.6,

129.2, 128.8, 128.5, 127.7, 127.6, 127.5, 125.9, 124.7, 123.3, 123.3, 111.0 (SCN), 38.3, 21.6; IR (KBr,  $\text{cm}^{-1}$ ) 2924, 2154 (SCN), 1697, 1541, 1456, 1339, 1159; HRMS (ESI)  $m/z$ :  $[\text{M} + \text{H}]^+$  calcd for  $\text{C}_{23}\text{H}_{19}\text{N}_2\text{O}_2\text{S}_2$  419.0882, found 419.0891.

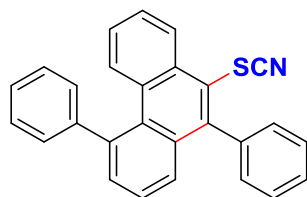

**4,10-Diphenyl-9-thiocyanatophenanthrene (3n).** Yellow solid; 21.5 mg, 56% yield; Eluent PE/EtOAc (50:1, v/v), TLC  $R_f = 0.38$ ; mp: 59–60 °C;  $^1\text{H}$  NMR (400 MHz,  $\text{CDCl}_3$ )  $\delta$  8.51 (d,  $J = 8.4$  Hz, 1H), 7.81 (d,  $J = 8.4$  Hz, 1H), 7.58–7.50 (m, 5H), 7.44–7.32 (m, 9H), 7.14 (t,  $J = 7.2$  Hz, 1H);  $^{13}\text{C}$  NMR (100 MHz,  $\text{CDCl}_3$ )  $\delta$  147.4, 144.7, 140.5, 139.4, 133.3, 133.0, 131.3, 130.1, 129.8, 129.3, 129.2, 129.0, 128.7, 128.6, 128.4, 127.7, 127.4, 126.2, 125.8, 120.0, 111.3 (SCN); IR (KBr,  $\text{cm}^{-1}$ ) 3055, 2922, 2153 (SCN), 1653, 1491, 1441, 1265; HRMS (ESI)  $m/z$ :  $[\text{M} + \text{H}]^+$  calcd for  $\text{C}_{27}\text{H}_{18}\text{NS}$  388.1154, found 388.1156.

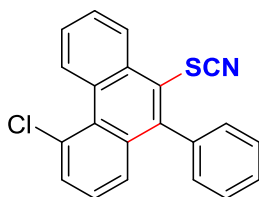

**4-Chloro-10-phenyl-9-thiocyanatophenanthrene (3o).** White solid; 25.2 mg, 73% yield; Eluent PE/EtOAc (50:1, v/v), TLC  $R_f = 0.40$ ; mp: 225–226 °C;  $^1\text{H}$  NMR (400 MHz,  $\text{CDCl}_3$ )  $\delta$  9.85 (d,  $J = 8.0$  Hz, 1H), 8.61 (dd,  $J = 8.2, 1.0$  Hz, 1H), 7.81–7.69 (m, 3H), 7.54–7.49 (m, 3H), 7.36 (dd,  $J = 8.4, 1.6$  Hz, 1H), 7.31 (d,  $J = 7.6$  Hz, 1H), 7.28–7.25 (m, 2H);  $^{13}\text{C}$  NMR (100 MHz,  $\text{CDCl}_3$ )  $\delta$  140.1, 138.7, 132.5, 131.6, 131.3, 130.2, 129.5, 129.0, 128.8, 128.4, 128.4, 127.5, 127.3, 127.2, 127.1, 123.3, 122.7, 122.6, 111.1 (SCN); IR (KBr,  $\text{cm}^{-1}$ ) 2918, 2153 (SCN), 1647, 1522, 1508, 1458, 1339, 1260; HRMS (ESI)  $m/z$ :  $[\text{M} + \text{H}]^+$  calcd for  $\text{C}_{21}\text{H}_{13}\text{ClNS}$  346.0452, found 346.0451.

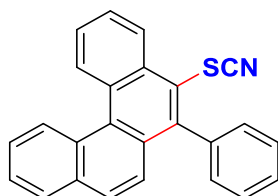

**6-Phenyl-5-thiocyanatobenzo[c]phenanthrene (3p).** White solid; 26.3 mg, 73% yield; Eluent PE/EtOAc (50:1, v/v), TLC  $R_f = 0.40$ ; mp: 201–203 °C;  $^1\text{H}$  NMR (400 MHz,  $\text{CDCl}_3$ )  $\delta$  9.11 (d,  $J = 8.4$  Hz, 1H), 9.04 (d,  $J = 8.0$  Hz, 1H), 8.75 (d,  $J = 8.0$  Hz, 1H),

8.00 (d,  $J = 7.6$  Hz, 1H), 7.86 (t,  $J = 7.0$  Hz, 1H), 7.82–7.67 (m, 4H), 7.61–7.58 (m, 3H), 7.41–7.37 (m, 3H);  $^{13}\text{C}$  NMR (100 MHz,  $\text{CDCl}_3$ )  $\delta$  146.6, 139.1, 134.0, 131.6, 130.9, 130.3, 130.2, 130.0, 129.3, 129.0, 129.0, 128.7, 128.5, 128.3, 127.9, 127.8, 127.4, 127.0, 126.7, 126.2, 126.2, 119.1, 111.2 (SCN); IR (KBr,  $\text{cm}^{-1}$ ) 2920, 2151 (SCN), 1651, 1506, 1420, 1375, 1263; HRMS (ESI)  $m/z$ :  $[\text{M} + \text{H}]^+$  calcd for  $\text{C}_{25}\text{H}_{16}\text{NS}$  362.0998, found 362.0997.

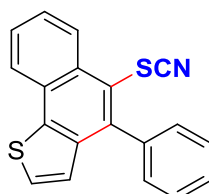

**4-Phenyl-5-thiocyanatonaphtho[1,2-b]thiophene (3q).** Brown oil; 28.5 mg, 90% yield; Eluent PE/EtOAc (50:1, v/v), TLC  $R_f = 0.35$ ;  $^1\text{H}$  NMR (400 MHz,  $\text{CDCl}_3$ )  $\delta$  7.58–7.56 (m, 1H), 7.47–7.42 (m, 4H), 7.34 (d,  $J = 3.6$  Hz, 1H), 7.31–7.26 (m, 5H);  $^{13}\text{C}$  NMR (100 MHz,  $\text{CDCl}_3$ )  $\delta$  150.5, 137.5, 134.3, 133.8, 131.5, 128.8, 128.8, 128.7, 128.6, 128.4, 127.6, 122.9, 121.0, 117.9, 110.4 (SCN), 94.9, 88.6; IR (KBr,  $\text{cm}^{-1}$ ) 3059, 2963, 2156 (SCN), 1597, 1491, 1422, 1261; HRMS (ESI)  $m/z$ :  $[\text{M} + \text{H}]^+$  calcd for  $\text{C}_{19}\text{H}_{12}\text{NS}_2$  318.0406, found 318.0410.

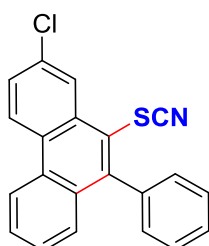

**2-Chloro-9-phenyl-10-thiocyanatophenanthrene (3r).** White solid; 17.2 mg, 50% yield; Eluent PE/EtOAc (50:1, v/v), TLC  $R_f = 0.38$ ; mp: 201–202  $^\circ\text{C}$ ;  $^1\text{H}$  NMR (400 MHz,  $\text{CDCl}_3$ )  $\delta$  8.66–8.62 (m, 2H), 8.55 (d,  $J = 2.0$  Hz, 1H), 7.70–7.66 (m, 2H), 7.52–7.40 (m, 5H), 7.29 (dd,  $J = 7.6, 2.0$  Hz, 2H);  $^{13}\text{C}$  NMR (100 MHz,  $\text{CDCl}_3$ )  $\delta$  149.1, 138.6, 134.6, 131.8, 131.8, 131.1, 129.6, 129.5, 129.3, 128.7, 128.6, 128.4, 127.6, 126.1, 124.9, 122.7, 118.4, 110.8 (SCN); IR (KBr,  $\text{cm}^{-1}$ ) 2922, 2151 (SCN), 1715, 1557, 1504, 1479, 1339, 1217; HRMS (ESI)  $m/z$ :  $[\text{M} + \text{H}]^+$  calcd for  $\text{C}_{21}\text{H}_{13}\text{ClNS}$  346.0452, found 346.0452.

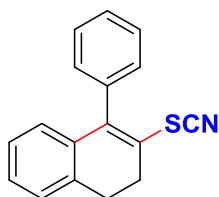

**4-Phenyl-3-thiocyanato-1,2-dihydronaphthalene (5a).** White solid; 21.3 mg, 81% yield; Eluent PE/EtOAc (50:1, v/v), TLC  $R_f = 0.50$ ; mp: 67–68 °C;  $^1\text{H}$  NMR (400 MHz,  $\text{CDCl}_3$ )  $\delta$  7.49–7.44 (m, 3H), 7.20–7.16 (m, 4H), 7.08–7.04 (m, 1H), 6.62 (d,  $J = 7.6$  Hz, 1H), 3.09 (t,  $J = 8.0$  Hz, 2H), 2.94 (t,  $J = 8.0$  Hz, 2H);  $^{13}\text{C}$  NMR (100 MHz,  $\text{CDCl}_3$ )  $\delta$  141.4, 136.7, 134.8, 134.5, 129.5, 129.0, 128.7, 128.3, 127.6, 126.7, 126.2, 122.1, 110.5 (SCN), 29.3, 28.6; IR (KBr,  $\text{cm}^{-1}$ ) 3061, 2926, 2153 (SCN), 1684, 1541, 1489, 1456, 1339, 1279; HRMS (ESI)  $m/z$ :  $[\text{M} + \text{H}]^+$  calcd for  $\text{C}_{17}\text{H}_{14}\text{NS}$  264.0841, found 264.0843.

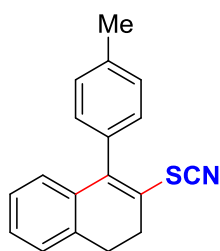

**3-Thiocyanato-4-(p-tolyl)-1,2-dihydronaphthalene (5b).** Colorless oil; 21.6 mg, 78% yield; Eluent PE/EtOAc (50:1, v/v), TLC  $R_f = 0.50$ ;  $^1\text{H}$  NMR (400 MHz,  $\text{CDCl}_3$ )  $\delta$  7.19 (t,  $J = 7.4$  Hz, 2H), 7.11 (d,  $J = 4.8$  Hz, 2H), 6.98 (d,  $J = 8.0$  Hz, 3H), 6.57 (d,  $J = 7.6$  Hz, 1H), 3.00 (t,  $J = 7.8$  Hz, 2H), 2.85 (t,  $J = 8.2$  Hz, 2H), 2.35 (s, 3H);  $^{13}\text{C}$  NMR (100 MHz,  $\text{CDCl}_3$ )  $\delta$  141.3, 138.6, 135.0, 134.5, 133.6, 129.7, 129.4, 128.2, 127.5, 126.7, 126.2, 121.9, 110.5 (SCN), 29.3, 28.6, 21.4; IR (KBr,  $\text{cm}^{-1}$ ) 3022, 2922, 2153 (SCN), 1684, 1616, 1508, 1483, 1456, 1279; HRMS (ESI)  $m/z$ :  $[\text{M} + \text{H}]^+$  calcd for  $\text{C}_{18}\text{H}_{16}\text{NS}$  278.0998, found 278.0995.

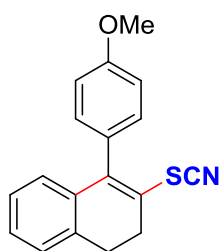

**4-(4-Methoxyphenyl)-3-thiocyanato-1,2-dihydronaphthalene (5c).** White solid; 19.6 mg, 67% yield; Eluent PE/EtOAc (50:1, v/v), TLC  $R_f = 0.35$ ; mp: 93–94 °C;  $^1\text{H}$  NMR (400 MHz,  $\text{CDCl}_3$ )  $\delta$  7.22 (d,  $J = 4.0$  Hz, 2H), 7.13–7.09 (m, 3H), 7.02 (d,  $J = 8.8$  Hz, 2H), 6.69 (d,  $J = 8.0$  Hz, 1H), 3.90 (s, 3H), 3.11 (t,  $J = 8.0$  Hz, 2H), 2.96 (t,  $J = 7.8$  Hz, 2H);  $^{13}\text{C}$  NMR (100 MHz,  $\text{CDCl}_3$ )  $\delta$  159.8, 140.8, 135.1, 134.5, 130.8, 128.7, 128.2, 127.5, 126.7, 126.2, 122.2, 114.4, 110.6 (SCN), 55.3, 29.3, 28.6; IR (KBr,  $\text{cm}^{-1}$ ) 3028, 2932, 2153 (SCN), 1605, 1508, 1454, 1288, 1248, 1175; HRMS (ESI)  $m/z$ :  $[\text{M} + \text{H}]^+$  calcd for  $\text{C}_{18}\text{H}_{16}\text{NOS}$  294.0947, found 294.0954.

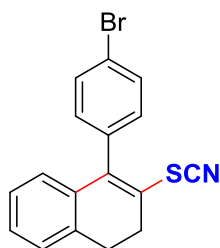

**4-(4-Bromophenyl)-3-thiocyanato-1,2-dihydronaphthalene (5d).** Colorless oil; 27.8 mg, 82% yield; Eluent PE/EtOAc (50:1, v/v), TLC  $R_f = 0.40$ ;  $^1\text{H}$  NMR (400 MHz,  $\text{CDCl}_3$ )  $\delta$  7.54 (d,  $J = 8.4$  Hz, 2H), 7.13 (d,  $J = 4.4$  Hz, 2H), 7.02–6.98 (m, 3H), 6.52 (d,  $J = 8.0$  Hz, 1H), 3.01 (t,  $J = 7.8$  Hz, 2H), 2.86 (t,  $J = 7.8$  Hz, 2H);  $^{13}\text{C}$  NMR (100 MHz,  $\text{CDCl}_3$ )  $\delta$  140.4, 135.5, 134.4, 134.4, 132.3, 131.2, 128.6, 127.7, 126.8, 126.0, 123.0, 122.5, 110.0 (SCN), 29.4, 28.5; IR (KBr,  $\text{cm}^{-1}$ ) 3063, 2926, 2154 (SCN), 1609, 1587, 1483, 1450, 1393, 1279, 1069, 1013; HRMS (ESI)  $m/z$ :  $[\text{M} + \text{H}]^+$  calcd for  $\text{C}_{17}\text{H}_{13}\text{BrNS}$  341.9947, found 341.9950.

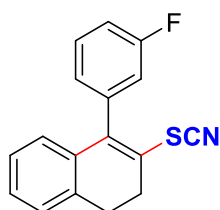

**4-(3-Fluorophenyl)-3-thiocyanato-1,2-dihydronaphthalene (5e).** Colorless oil; 22.4 mg, 80% yield; Eluent PE/EtOAc (50:1, v/v), TLC  $R_f = 0.40$ ;  $^1\text{H}$  NMR (400 MHz,  $\text{CDCl}_3$ )  $\delta$  7.48–7.42 (m, 1H), 7.21 (d,  $J = 4.3$  Hz, 2H), 7.16–7.12 (m, 1H), 7.10–7.06 (m, 1H), 6.97 (d,  $J = 7.6$  Hz, 1H), 6.91 (d,  $J = 9.1$  Hz, 1H), 6.61 (d,  $J = 7.7$  Hz, 1H), 3.09 (t,  $J = 7.9$  Hz, 2H), 2.94 (t,  $J = 8.0$  Hz, 2H);  $^{13}\text{C}$  NMR (100 MHz,  $\text{CDCl}_3$ )  $\delta$  163.0 (d,  $J = 248.4$  Hz), 140.3 (d,  $J = 1.9$  Hz), 138.7, 138.6, 134.4 (d,  $J = 4.0$  Hz), 130.7 (d,  $J = 8.4$  Hz), 128.5, 127.6, 126.8, 126.0, 125.3 (d,  $J = 3.0$  Hz), 122.6, 116.6 (d,  $J = 21.7$  Hz), 115.8 (d,  $J = 20.9$  Hz), 110.0 (SCN), 29.4, 28.5; IR (KBr,  $\text{cm}^{-1}$ ) 2926, 2154 (SCN), 1653, 1581, 1487, 1456, 1339, 1265, 1213, 1148; HRMS (ESI)  $m/z$ :  $[\text{M} + \text{H}]^+$  calcd for  $\text{C}_{17}\text{H}_{13}\text{FNS}$  282.0747, found 282.0743.

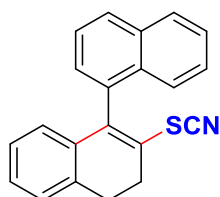

**2-Thiocyanato-3,4-dihydro-1,1'-binaphthalene (5f).** White solid; 26.6 mg, 85% yield; Eluent PE/EtOAc (50:1, v/v), TLC  $R_f = 0.38$ ; mp: 102–104  $^\circ\text{C}$ ;  $^1\text{H}$  NMR (400 MHz,

CDCl<sub>3</sub>)  $\delta$  7.95 (t,  $J$  = 8.9 Hz, 2H), 7.58–7.51 (m, 3H), 7.43 (t,  $J$  = 7.6 Hz, 1H), 7.32 (d,  $J$  = 7.0 Hz, 1H), 7.26 (d,  $J$  = 7.2 Hz, 1H), 7.18 (t,  $J$  = 7.9 Hz, 1H), 6.96 (t,  $J$  = 7.6 Hz, 1H), 6.44 (d,  $J$  = 7.7 Hz, 1H), 3.26–3.00 (m, 4H); <sup>13</sup>C NMR (100 MHz, CDCl<sub>3</sub>)  $\delta$  138.3, 133.6, 133.0, 132.9, 132.8, 130.2, 128.3, 127.6, 127.3, 126.8, 126.5, 125.9, 125.8, 125.5, 125.0, 124.5, 123.9, 123.0, 109.3 (SCN), 28.2, 27.7; IR (KBr, cm<sup>-1</sup>) 3055, 2955, 2153 (SCN), 1715, 1651, 1539, 1506, 1456, 1339, 1260; HRMS (ESI)  $m/z$ : [M + H]<sup>+</sup> calcd for C<sub>21</sub>H<sub>16</sub>NS 314.0998, found 314.1001.

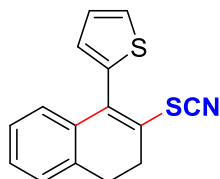

**2-(2-Thiocyanato-3,4-dihydronaphthalen-1-yl)thiophene (5g).** Yellow oil; 19.4 mg, 72% yield; Eluent PE/EtOAc (50:1, v/v), TLC  $R_f$  = 0.40; <sup>1</sup>H NMR (400 MHz, CDCl<sub>3</sub>)  $\delta$  7.53 (d,  $J$  = 5.2 Hz, 1H), 7.24–7.21 (m, 2H), 7.18–7.13 (m, 2H), 7.01 (d,  $J$  = 3.2 Hz, 1H), 6.85 (d,  $J$  = 7.6 Hz, 1H), 3.10 (t,  $J$  = 7.8 Hz, 2H), 2.98 (t,  $J$  = 8.2 Hz, 2H); <sup>13</sup>C NMR (100 MHz, CDCl<sub>3</sub>)  $\delta$  136.3, 134.8, 134.1, 133.5, 129.4, 128.5, 127.7, 127.4, 127.3, 126.9, 126.7, 125.8, 110.2 (SCN); 29.4, 28.3; IR (KBr, cm<sup>-1</sup>) 3065, 2932, 2153 (SCN), 1717, 1684, 1603, 1541, 1481, 1456, 1435, 1275, 1215; HRMS (ESI)  $m/z$ : [M + H]<sup>+</sup> calcd for C<sub>15</sub>H<sub>12</sub>NS<sub>2</sub> 270.0406, found 270.0403.

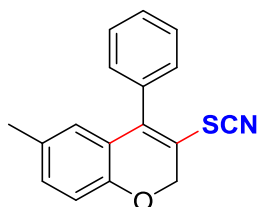

**6-Methyl-4-phenyl-3-thiocyanato-2H-chromene (5i).** Yellow oil; 21.7 mg, 78% yield; Eluent PE/EtOAc (50:1, v/v), TLC  $R_f$  = 0.40; <sup>1</sup>H NMR (400 MHz, CDCl<sub>3</sub>)  $\delta$  7.44–7.40 (m, 3H), 7.15–7.12 (m, 2H), 6.94 (dd,  $J$  = 8.4, 1.6 Hz, 1H), 6.77 (d,  $J$  = 8.4 Hz, 1H), 6.39 (d,  $J$  = 1.6 Hz, 1H), 4.99 (s, 2H), 2.07 (s, 3H); <sup>13</sup>C NMR (100 MHz, CDCl<sub>3</sub>)  $\delta$  151.4, 141.4, 134.4, 131.4, 131.3, 129.2, 129.1, 129.0, 126.9, 123.5, 116.1, 111.9, 108.6 (SCN), 67.6, 20.6; IR (KBr, cm<sup>-1</sup>) 3057, 2924, 2154 (SCN), 1670, 1489, 1456, 1277, 1233, 1026; HRMS (ESI)  $m/z$ : [M – H]<sup>-</sup> calcd for C<sub>17</sub>H<sub>12</sub>NOS 278.0634, found 278.0633.

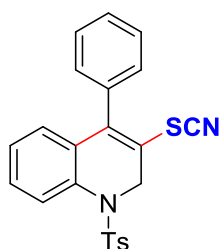

**4-Phenyl-3-thiocyanato-1-tosyl-1,2-dihydroquinoline (5j).** White solid; 27.0 mg, 65% yield; Eluent PE/EtOAc (10:1, v/v), TLC  $R_f$  = 0.32; mp: 177–179 °C;  $^1\text{H}$  NMR (400 MHz,  $\text{CDCl}_3$ )  $\delta$  7.77 (d,  $J$  = 8.0 Hz, 1H), 7.36–7.23 (m, 6H), 7.12 (d,  $J$  = 8.4 Hz, 2H), 7.07 (t,  $J$  = 7.6 Hz, 1H), 6.50 (d,  $J$  = 8.8 Hz, 1H), 6.40 (d,  $J$  = 6.8 Hz, 2H), 4.79 (s, 2H), 2.34 (s, 3H);  $^{13}\text{C}$  NMR (100 MHz,  $\text{CDCl}_3$ )  $\delta$  144.2, 140.8, 135.5, 134.4, 134.2, 130.6, 129.5, 129.1, 129.0, 128.8, 127.6, 127.4, 127.2, 126.6, 115.2, 108.4 (SCN), 48.8, 21.5; IR (KBr,  $\text{cm}^{-1}$ ) 2920, 2851, 2154 (SCN), 1647, 1541, 1508, 1456, 1362, 1167, 1084; HRMS (ESI)  $m/z$ :  $[\text{M} + \text{H}]^+$  calcd for  $\text{C}_{23}\text{H}_{19}\text{N}_2\text{O}_2\text{S}_2$  419.0882, found 419.0890.

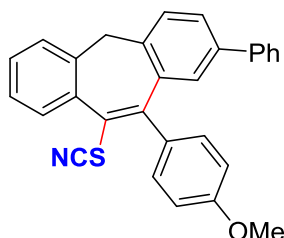

**11-(4-Methoxyphenyl)-2-phenyl-10-thiocyanato-5H-dibenzo[a,d][7]annulene (9).** White solid; 38.0 mg, 88% yield; Eluent PE/EtOAc (20:1, v/v), TLC  $R_f$  = 0.35; mp: 185–186 °C;  $^1\text{H}$  NMR (400 MHz,  $\text{CDCl}_3$ )  $\delta$  7.86–7.84 (m, 1H), 7.48 (dd,  $J$  = 7.9, 1.9 Hz, 1H), 7.39–7.25 (m, 9H), 7.17 (d,  $J$  = 8.4 Hz, 2H), 7.00–6.97 (m, 3H), 3.90 (d,  $J$  = 2.1 Hz, 2H), 3.87 (s, 3H);  $^{13}\text{C}$  NMR (100 MHz,  $\text{CDCl}_3$ )  $\delta$  160.1, 147.0, 141.5, 140.5, 140.5, 139.1, 136.6, 133.4, 133.4, 131.3, 130.1, 129.5, 129.3, 128.7, 128.5, 127.3, 127.0, 126.7, 126.6, 125.9, 114.2, 111.3 (SCN), 55.4, 40.6; IR (KBr,  $\text{cm}^{-1}$ ) 3028, 2930, 2839, 2153 (SCN), 1605, 1508, 1479, 1294, 1252, 1177, 1028; HRMS (ESI)  $m/z$ :  $[\text{M} - \text{H}]^-$  calcd for  $\text{C}_{29}\text{H}_{20}\text{NOS}$  430.1260, found 430.1264.

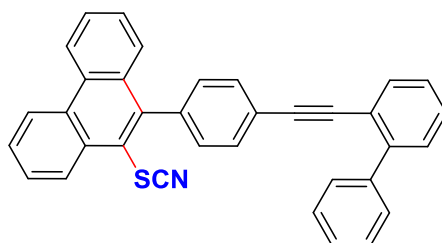

**9-(4-([1,1'-biphenyl]-2-ylethynyl)phenyl)-10-thiocyanatophenanthrene (12).** Yellow solid; 41.0 mg, 84% yield; Eluent PE/EtOAc (10:1, v/v), TLC  $R_f$  = 0.50; mp: 177–179 °C;  $^1\text{H}$  NMR (400 MHz,  $\text{CDCl}_3$ )  $\delta$  8.85–8.80 (m, 2H), 8.68–8.66 (m, 1H),



7.89–7.84 (m, 2H), 7.81–7.75 (m, 4H), 7.59–7.39 (m, 10H), 7.34 (d,  $J = 8.2$  Hz, 2H);  $^{13}\text{C}$  NMR (100 MHz,  $\text{CDCl}_3$ )  $\delta$  147.0, 144.2, 140.6, 138.7, 133.0, 131.6, 131.6, 131.5, 131.2, 130.3, 129.8, 129.6, 129.4, 129.0, 128.9, 128.8, 128.4, 128.0, 128.0, 127.6, 127.4, 127.1, 126.8, 123.7, 123.2, 122.8, 121.5, 119.4, 111.1 (SCN), 91.7, 90.6; IR (KBr,  $\text{cm}^{-1}$ ) 3063, 2924, 2853, 2214, 2153 (SCN), 1717, 1653, 1508, 1449, 1396, 1265, 1157; HRMS (ESI)  $m/z$ :  $[\text{M} + \text{H}]^+$  calcd for  $\text{C}_{35}\text{H}_{22}\text{NS}$  488.1467, found 488.1464.

#### 4. Gram scale reaction and derivatization of products

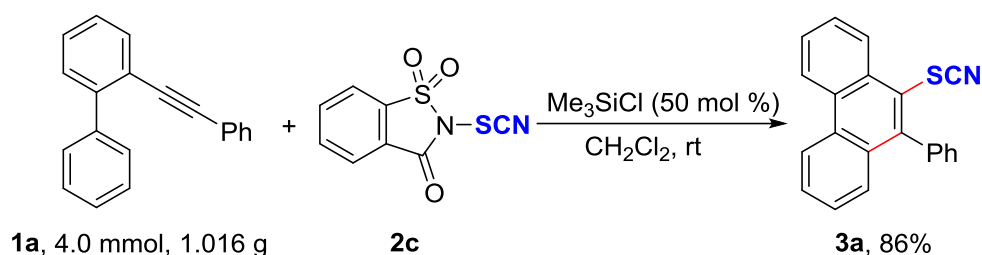

**Gram scale reaction.** To a 100 mL oven-dried flask containing **1a** (1.016 g, 4.0 mmol) was added dichloromethane (40.0 mL) under an argon atmosphere. Then **2c** (1.92 g, 8.0 mmol) was added. Subsequently, the mixture was added trimethylchlorosilane (216 mg, 2.0 mmol) and stirred at room temperature for 24 h. When the reaction was completed, the mixture was concentrated in vacuo and the product was purified by column chromatography on silica gel (petroleum ether/ethyl acetate = 50:1, v/v) to afford the product **3a** (1.065 g, 86% yield).

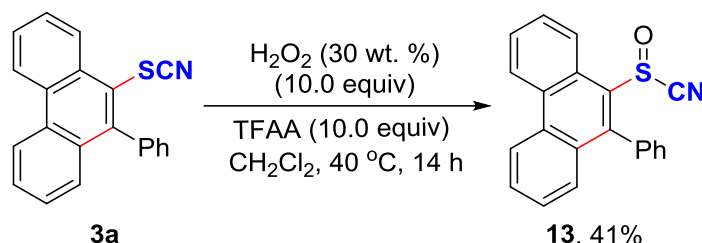

**Procedure for the synthesis of 13.** Hydrogen peroxide (30 wt. % in water, 10.0 equiv) was added dropwise at 0 °C to a solution of trifluoroacetic anhydride (10.0 equiv) in dichloromethane (10.0 mL). After being stirred for 40 min, **3a** (155.5 mg, 0.5 mmol) was added slowly and the mixture was stirred at 40 °C for 14 h. When the reaction was completed, the reaction was quenched with water, extracted with dichloromethane, the combined organic phases were washed with brine and dried over anhydrous  $\text{Na}_2\text{SO}_4$ , filtered, and concentrated in vacuo. The residue was purified by flash chromatography on silica gel with petroleum ether/ethyl acetate.

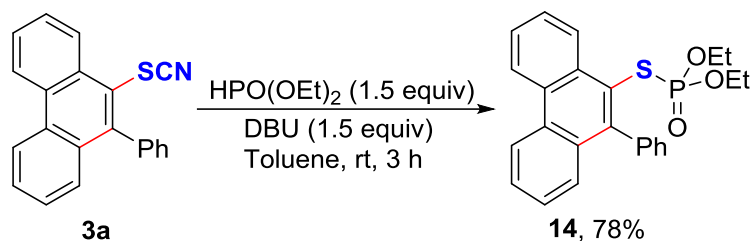

**Procedure for the synthesis of 14.** To a solution of **3a** (31.1 mg, 0.1 mmol) and diethyl phosphite (20.7 mg, 0.15 mmol) in dry toluene (1.0 mL) was added DBU (23.0 mg, 0.15 mmol) dropwise and the solution was stirred for 3 h. When the reaction was completed, the mixture was concentrated in vacuo and the product was purified by column chromatography on silica gel with petroleum ether/ethyl acetate.

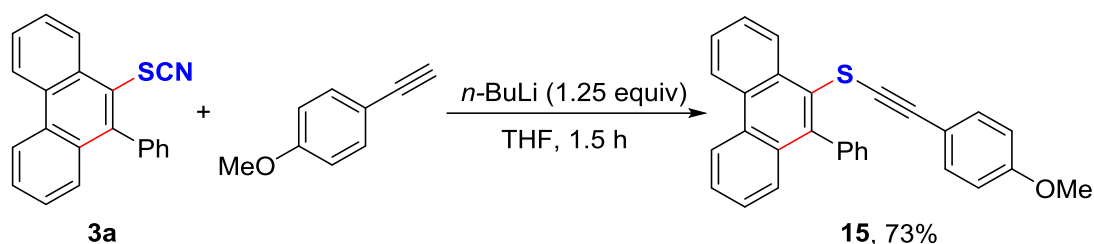

**Procedure for the synthesis of 15.** Under an argon atmosphere, a solution of 4-methoxyphenylacetylene (26.4 mg, 0.2 mmol) in dry THF (2.0 mL) was cooled to  $-78$  °C. Then *n*-BuLi (0.1 mL, 0.25 mmol, 2.5 M in *n*-hexane) was added dropwise. Subsequently, **3a** (74.6 mg, 0.24 mmol) was added slowly and the mixture was gradually warmed to room temperature for 1.5 h. When the reaction was completed, the solution was quenched with water (2 drops), concentrated in vacuo and the product was purified by column chromatography on silica gel with petroleum ether/ethyl acetate.

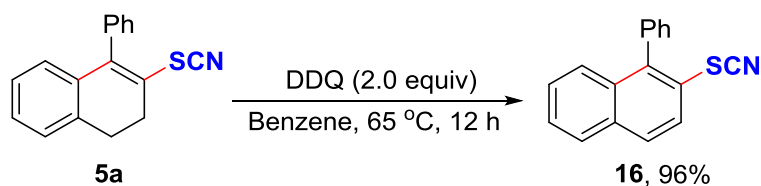

**Procedure for the synthesis of 16.** To a solution of **5a** (26.3 mg, 0.1 mmol) in benzene (1.0 mL) was added DDQ (45.4 mg, 0.2 mmol) and the solution was stirred at  $65$  °C for 12 h. When the reaction was completed, the mixture was cooled to room temperature and concentrated in vacuo, the residue was purified by column chromatography on silica gel with petroleum ether/ethyl acetate.

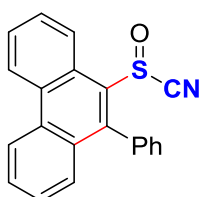

**10-Phenylphenanthrene-9-sulfinyl cyanide (13).** Yellow solid; 67.0 mg, 41% yield; Eluent PE/EtOAc (10:1, v/v), TLC  $R_f = 0.50$ ; mp: 165–167 °C;  $^1\text{H}$  NMR (400 MHz,  $\text{CDCl}_3$ )  $\delta$  8.97–8.95 (m, 1H), 8.86–8.83 (m, 1H), 8.80 (d,  $J = 8.4$  Hz, 1H), 7.88–7.81 (m, 3H), 7.62–7.58 (m, 5H), 7.50–7.48 (m, 1H), 7.32 (d,  $J = 7.2$  Hz, 1H);  $^{13}\text{C}$  NMR (100 MHz,  $\text{CDCl}_3$ )  $\delta$  144.3, 135.1, 132.8, 131.2, 130.4, 130.3, 130.0, 129.7, 129.5, 129.1, 128.8, 128.8, 128.6, 127.8, 126.3, 125.3, 123.5, 123.1, 116.2; IR (KBr,  $\text{cm}^{-1}$ ) 2924, 2853, 2153 (CN), 1738, 1661, 1449, 1375, 1167, 1101; HRMS (ESI)  $m/z$ :  $[\text{M} + \text{H}]^+$  calcd for  $\text{C}_{21}\text{H}_{14}\text{NOS}$  328.0791, found 328.0792.

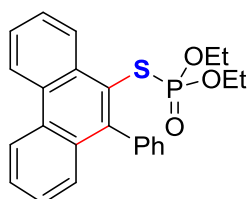

***O,O*-Diethyl *S*-(10-phenylphenanthren-9-yl) phosphorothioate (14).** White solid; 33.0 mg, 78% yield; Eluent PE/EtOAc (5:1, v/v), TLC  $R_f = 0.40$ ; mp: 112–114 °C;  $^1\text{H}$  NMR (400 MHz,  $\text{CDCl}_3$ )  $\delta$  8.87–8.84 (m, 1H), 8.76–8.73 (m, 2H), 7.73–7.64 (m, 3H), 7.53–7.44 (m, 7H), 3.91–3.74 (m, 4H), 1.14 (t,  $J = 7.1$  Hz, 6H);  $^{13}\text{C}$  NMR (100 MHz,  $\text{CDCl}_3$ )  $\delta$  147.4 (d,  $J = 7.9$  Hz), 140.3 (d,  $J = 2.0$  Hz), 132.8 (d,  $J = 2.1$  Hz), 132.4 (d,  $J = 3.5$  Hz), 131.1 (d,  $J = 2.2$  Hz), 130.9 (d,  $J = 1.7$  Hz), 130.8 (d,  $J = 1.5$  Hz), 128.7 (d,  $J = 1.4$  Hz), 128.4, 127.9, 127.7 (d,  $J = 1.5$  Hz), 127.3, 127.1 (d,  $J = 2.6$  Hz), 126.7, 122.7, 122.6 (d,  $J = 1.4$  Hz), 122.4 (d,  $J = 8.9$  Hz), 63.9 (d,  $J = 7.0$  Hz), 16.0 (d,  $J = 7.2$  Hz);  $^{31}\text{P}$  NMR (162 MHz,  $\text{CDCl}_3$ )  $\delta$  21.9; IR (KBr,  $\text{cm}^{-1}$ ) 3067, 2982, 2926, 1485, 1447, 1393, 1256, 1157, 1016; HRMS (ESI)  $m/z$ :  $[\text{M} + \text{H}]^+$  calcd for  $\text{C}_{24}\text{H}_{24}\text{O}_3\text{PS}$  423.1178, found 423.1184.

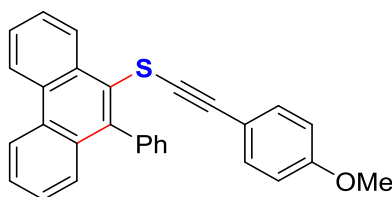

**(((4-Methoxyphenyl)ethynyl)(10-phenylphenanthren-9-yl)sulfane (15).** Yellow oil; 60.7 mg, 73% yield; Eluent PE/EtOAc (50:1, v/v), TLC  $R_f = 0.40$ ;  $^1\text{H}$  NMR (400 MHz,  $\text{CDCl}_3$ )  $\delta$  8.92 (d,  $J = 7.7$  Hz, 1H), 8.77–8.72 (m, 2H), 7.79–7.71 (m, 2H), 7.68–7.64 (m, 1H), 7.58–7.41 (m, 7H), 7.22 (d,  $J = 9.3$  Hz, 2H), 6.73 (d,  $J = 8.6$  Hz, 2H), 3.73 (s, 3H);  $^{13}\text{C}$  NMR (100 MHz,  $\text{CDCl}_3$ )  $\delta$  159.5, 144.5, 139.8, 133.3, 132.1, 131.1, 131.0, 131.0, 130.2, 128.6, 128.2, 128.1, 127.7, 127.7, 127.5, 127.2, 126.8, 126.8, 122.9, 122.6, 115.5, 113.8, 91.5, 77.8, 55.3; IR (KBr,  $\text{cm}^{-1}$ ) 3069, 2928, 2837, 2164, 1603, 1568,

1504, 1447, 1290, 1250, 1171, 1032; HRMS (ESI)  $m/z$ :  $[M + H]^+$  calcd for  $C_{29}H_{21}OS$  417.1308, found 417.1316.

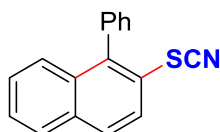

**1-Phenyl-2-thiocyanatonaphthalene (16).** Colorless oil; 25.0 mg, 96% yield; Eluent PE/EtOAc (50:1, v/v), TLC  $R_f = 0.60$ ;  $^1H$  NMR (400 MHz,  $CDCl_3$ )  $\delta$  7.96 (d,  $J = 8.8$  Hz, 1H), 7.90 (d,  $J = 8.2$  Hz, 1H), 7.83 (d,  $J = 8.8$  Hz, 1H), 7.56–7.51 (m, 4H), 7.43–7.42 (m, 2H), 7.30–7.28 (m, 2H);  $^{13}C$  NMR (100 MHz,  $CDCl_3$ )  $\delta$  139.7, 136.4, 133.0, 132.9, 130.0, 129.8, 129.0, 128.9, 128.1, 127.4, 127.0, 126.2, 124.8, 122.2, 110.9 (SCN); IR (KBr,  $cm^{-1}$ ) 3057, 2924, 2851, 2154 (SCN), 1684, 1584, 1504, 1491, 1443, 1385, 1321, 1267; HRMS (ESI)  $m/z$ :  $[M + H]^+$  calcd for  $C_{17}H_{12}NS$  262.0685, found 262.0678.

## 5. X-Ray Structure of 3d (CCDC 2210343)

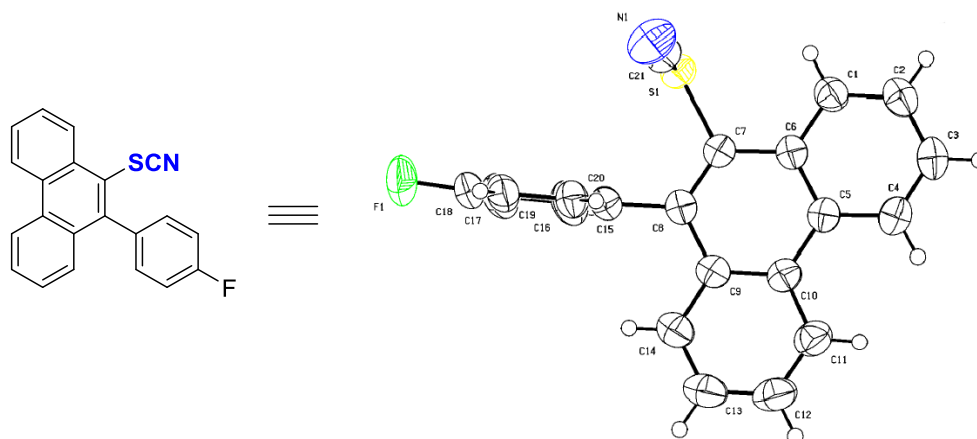

**Table 1.** Crystal data and structure refinement for the product **3d** (CCDC 2210343).

|                     |                   |
|---------------------|-------------------|
| Identification code | <b>3d</b>         |
| Empirical formula   | $C_{21}H_{12}FNS$ |
| Formula weight      | 329.38            |
| Temperature/K       | 293               |
| Space group         | P 1 21/c 1        |
| Hall group          | –P 2ybc           |
| $a/\text{\AA}$      | 11.3845(1)        |
| $b/\text{\AA}$      | 16.8992(1)        |
| $c/\text{\AA}$      | 8.1309(1)         |
| $\alpha/^\circ$     | 90                |

|                                  |                              |
|----------------------------------|------------------------------|
| $\beta/^\circ$                   | 92.673(1)                    |
| $\gamma/^\circ$                  | 90                           |
| Volume/ $\text{\AA}^3$           | 1562.59(3)                   |
| Z                                | 4                            |
| $\rho_{\text{calc}}/\text{cm}^3$ | 1.400                        |
| $\mu/\text{mm}^{-1}$             | 1.929                        |
| F(000)                           | 680.0                        |
| Bond precision                   | C–C = 0.0021 Å               |
| Wavelength                       | 1.54184                      |
| Data completeness                | 0.995                        |
| Theta (max)                      | 68.207                       |
| h, k, lmax                       | 13, 20, 9                    |
| R, wR <sub>2</sub>               | 0.0346( 2651), 0.0945( 2849) |
| S                                | 1.052                        |
| Npar                             | 218                          |

## 6. HPLC Chromatograms

Compound **13** chiral separation

**HPLC:** on AD-H column (*n*-hexane/*iso*-propanol, 90:10, v/v, 1.0 mL/min, 254 nm).

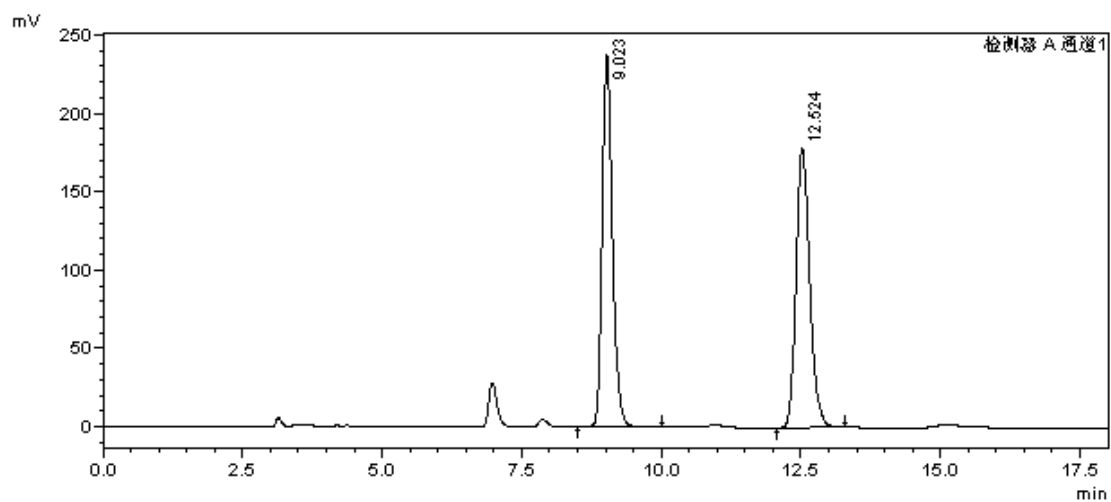

| Peak  | Time          | Area    | Area/%         |
|-------|---------------|---------|----------------|
| 1     | <b>9.023</b>  | 3037052 | <b>50.018</b>  |
| 2     | <b>12.524</b> | 3034845 | <b>49.982</b>  |
| total |               | 6071897 | <b>100.000</b> |

## 7. References

- [1] Qiu, J.; Wu, D.; Karmaker, P. G.; Yin, H.; Chen, F.-X. *Org. Lett.* **2018**, *20*, 1600–1603.
- [2] Fu, Z.; Gao, Y.; Yin, H.; Chen, F.-X. *J. Org. Chem.* **2021**, *86*, 17418–17427.
- [3] Wu, D.; Qiu, J.; Karmaker, P. G.; Yin, H.; Chen, F.-X. *J. Org. Chem.* **2018**, *83*, 1576–1583.
- [4] Li, C.; Long, P.; Wu, H.; Yin, H.; Chen, F.-X. *Org. Biomol. Chem.* **2019**, *17*, 7131–7134.
- [5] Akhmetov, V.; Feofanov, M.; Sharapa, D. I.; Amsharov, K. *J. Am. Chem. Soc.* **2021**, *143*, 15420–15426.
- [6] Takahashi, I.; Fujita, T.; Shoji, N.; Ichikawa, J. *Chem. Commun.* **2019**, *55*, 9267–9270.
- [7] Liu, W.; Chen, J.; Jin, R.; Xu, D.; Li, Y.; Ba, F.; Gu, G.; Kuang, Y.; Guo, H. *Org. Chem. Front.* **2016**, *3*, 852–855.
- [8] Pati, K.; Michas, C.; Allenger, D.; Piskun, I.; Coutros, P. S.; Gomes, G. P.; Alabugin, I. V. *J. Org. Chem.* **2015**, *80*, 11706–11717.
- [9] Zhao, M.; Barrado, A. G.; Sprenger, K.; Golz, C.; Mata, R. A.; Alcarazo, M. *Org. Lett.* **2020**, *22*, 4932–4937.
- [10] Tian, X.; Song, L.; Rudolph, M.; Wang, Q.; Song, X.; Rominger, F.; Hashmi, A. S. K. *Org. Lett.* **2019**, *21*, 1598–1601.
- [11] Zhang, J.; Li, S.; Qiao, Y.; Peng, C.; Wang, X.-N.; Chang, J. *Chem. Commun.*, **2018**, *54*, 12455–12458.
- [12] Unoh, Y.; Hirano, K.; Miura, M. *J. Am. Chem. Soc.* **2017**, *139*, 6106–6109.
- [13] Warner, A. J.; Lawson, J. R.; Fasano, V.; Ingleson, M. J. *Angew. Chem., Int. Ed.* **2015**, *54*, 11245–11249.
- [14] He, W.; Yu, J.; Wang, D.; Ran, G.; Xia, X.-F. *Org. Chem. Front.* **2019**, *6*, 3575–3579.
- [15] Medina-Mercado, I.; Colin-Molina, A.; Barquera-Lozada, J. E.; Rodríguez-Molina, B.; Porcel, S. *ACS Catal.* **2021**, *11*, 8968–8977.
- [16] Zhang, W.-W.; Zhang, X.-G.; Li, J.-H. *J. Org. Chem.* **2010**, *75*, 5259–5264.
- [17] Naveen, K.; Nikson, S. A.; Perumal, P. T. *Adv. Synth. Catal.* **2017**, *359*, 2407–2413.
- [18] Xie, C.; Zhang, Y.; Yang, Y. *Chem. Commun.* **2008**, 4810–4812.
- [19] Chen, L.; Kametani, Y.; Imamura, K.; Abe, T.; Shiota, Y.; Yoshizawa, K.; Hisaeda, Y.; Shimakoshi, H. *Chem. Commun.* **2019**, *55*, 13070–13073.
- [20] Mukherjee, N.; Chatterjee, T. *J. Org. Chem.* **2021**, *86*, 7881–7890.

## 8. Copies of $^1\text{H}$ , $^{13}\text{C}$ and $^{31}\text{P}$ NMR spectra

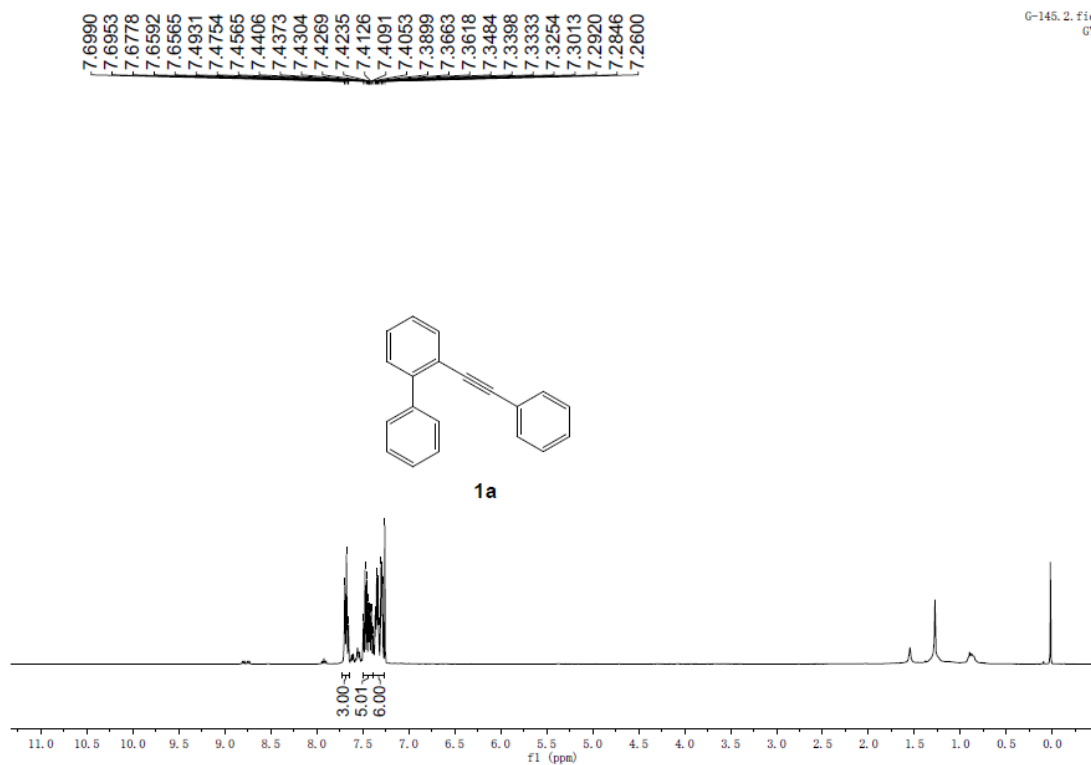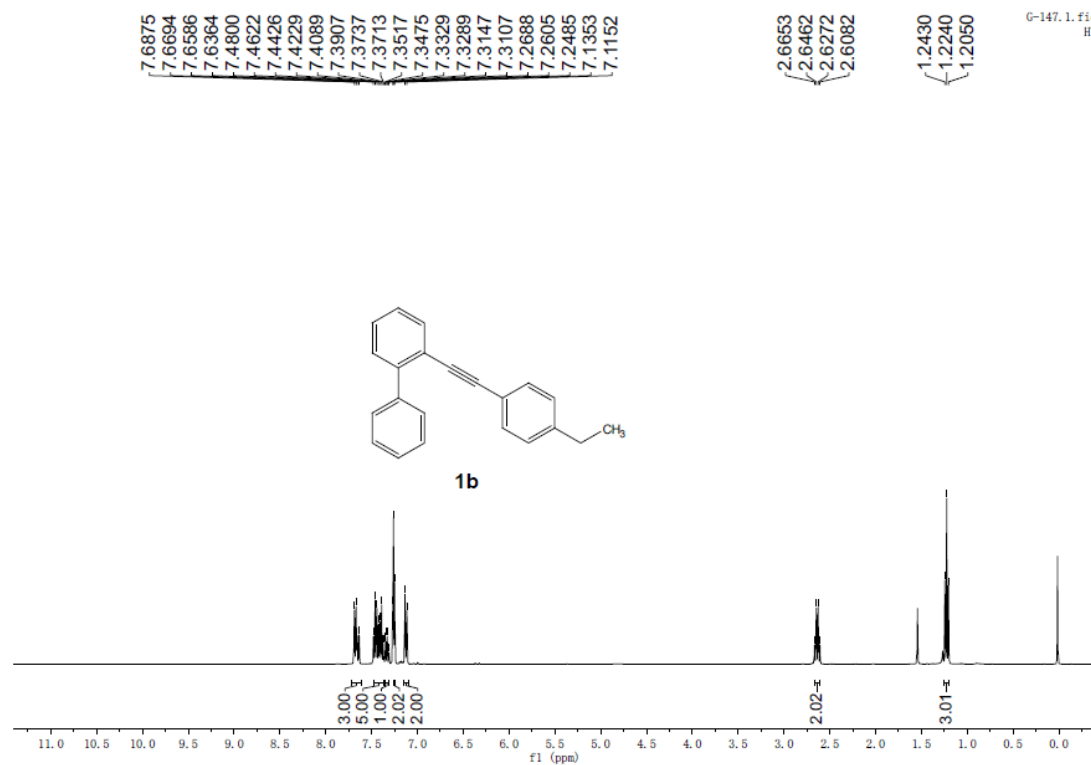

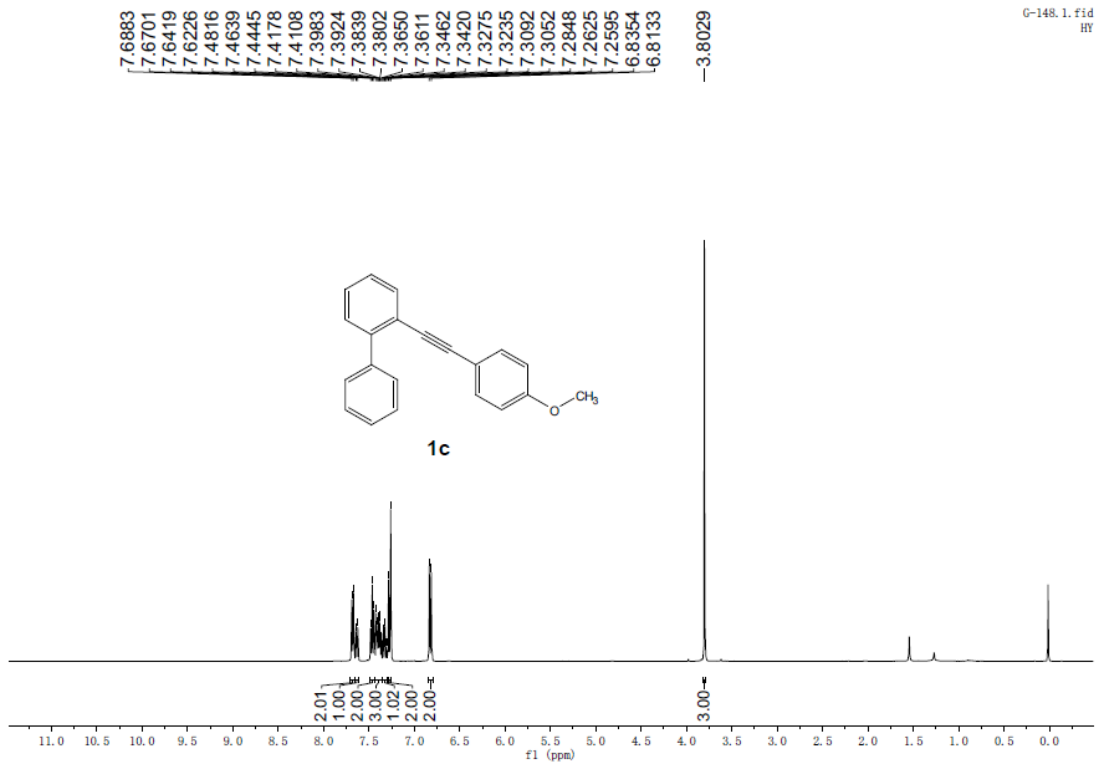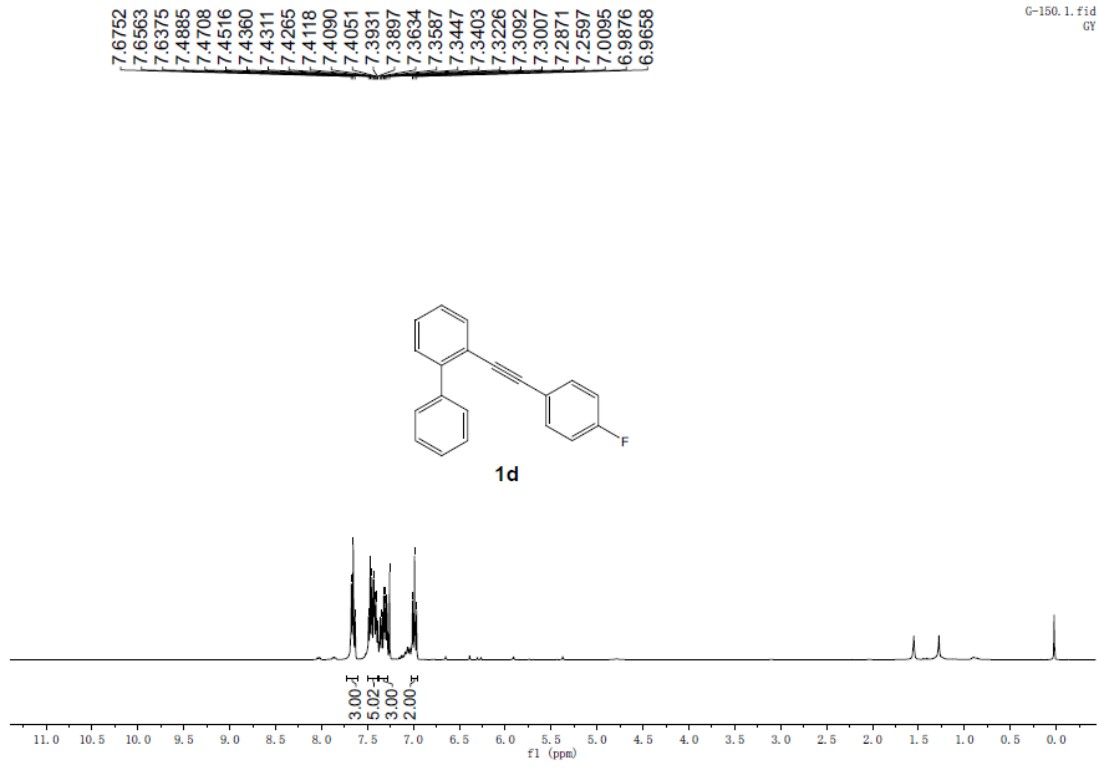



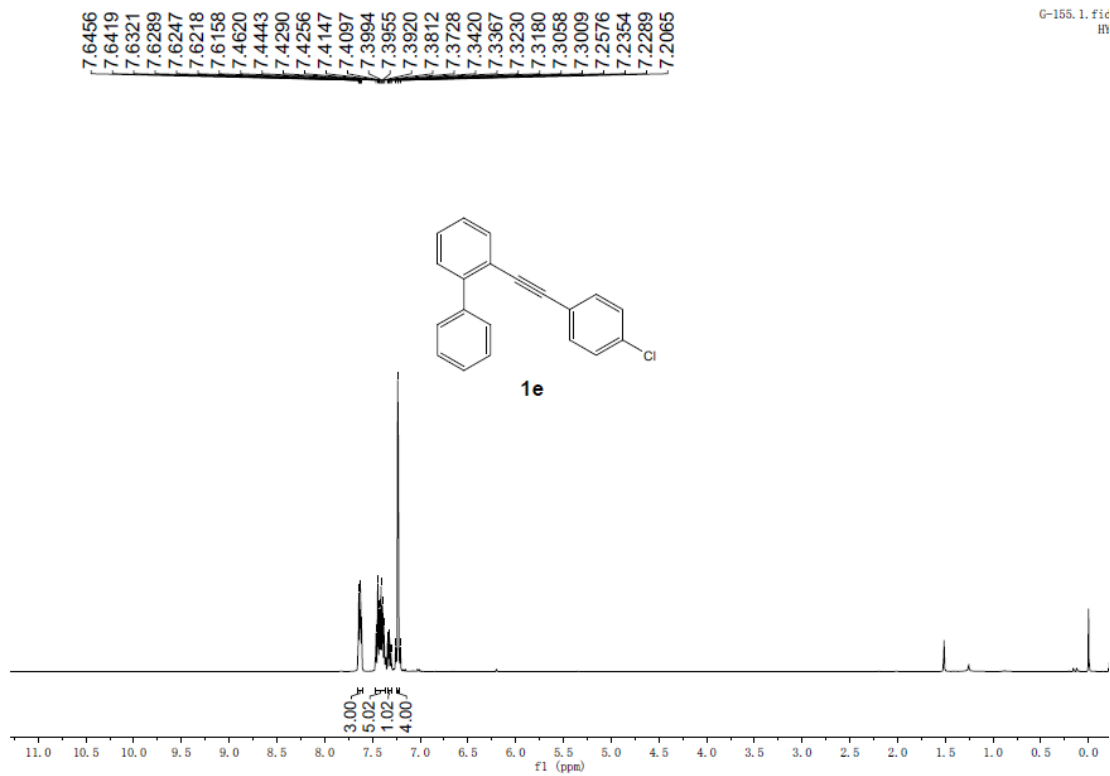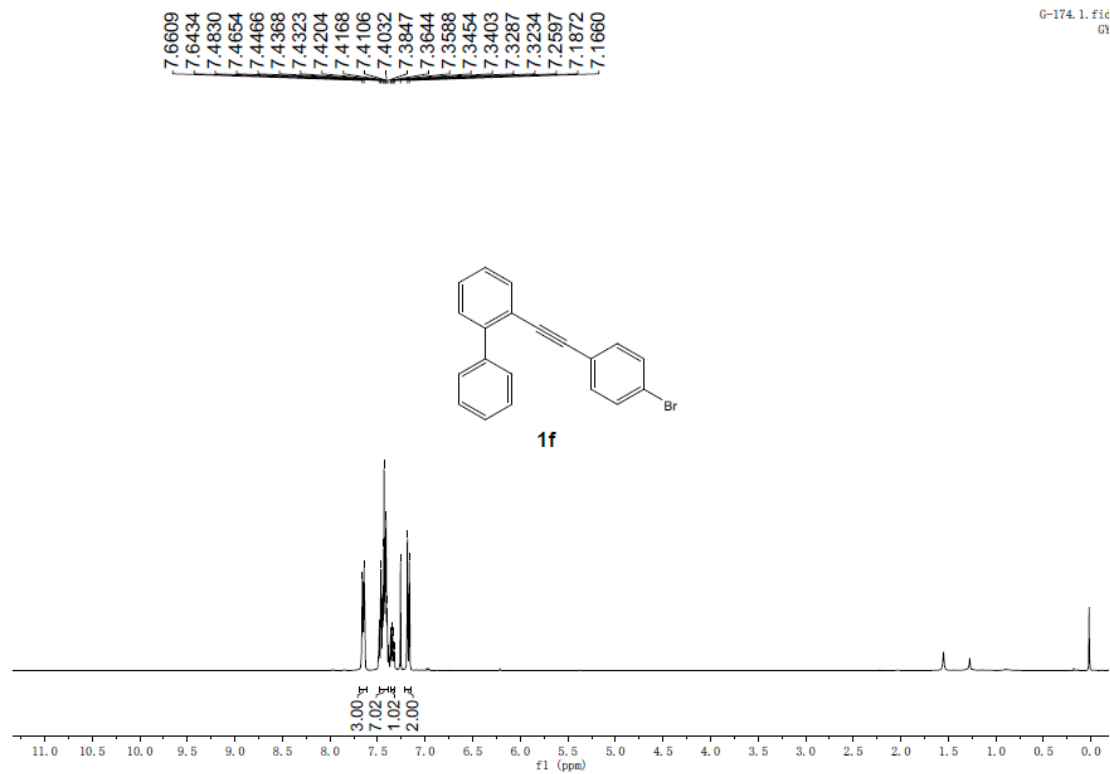

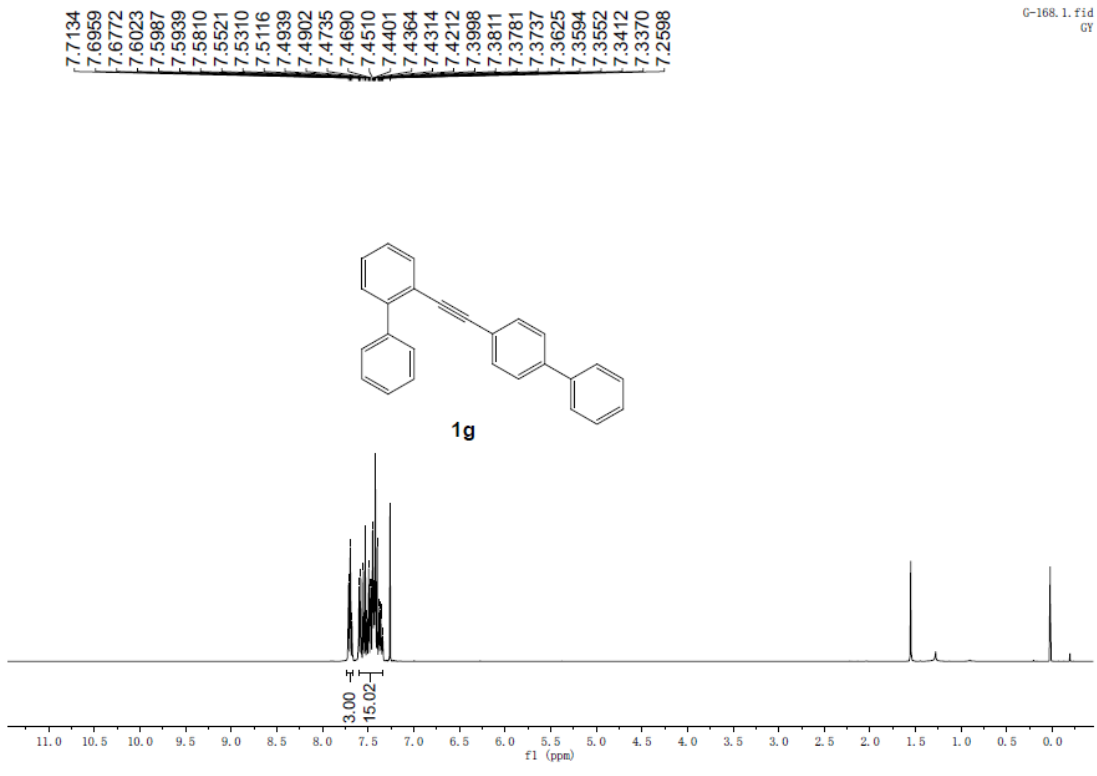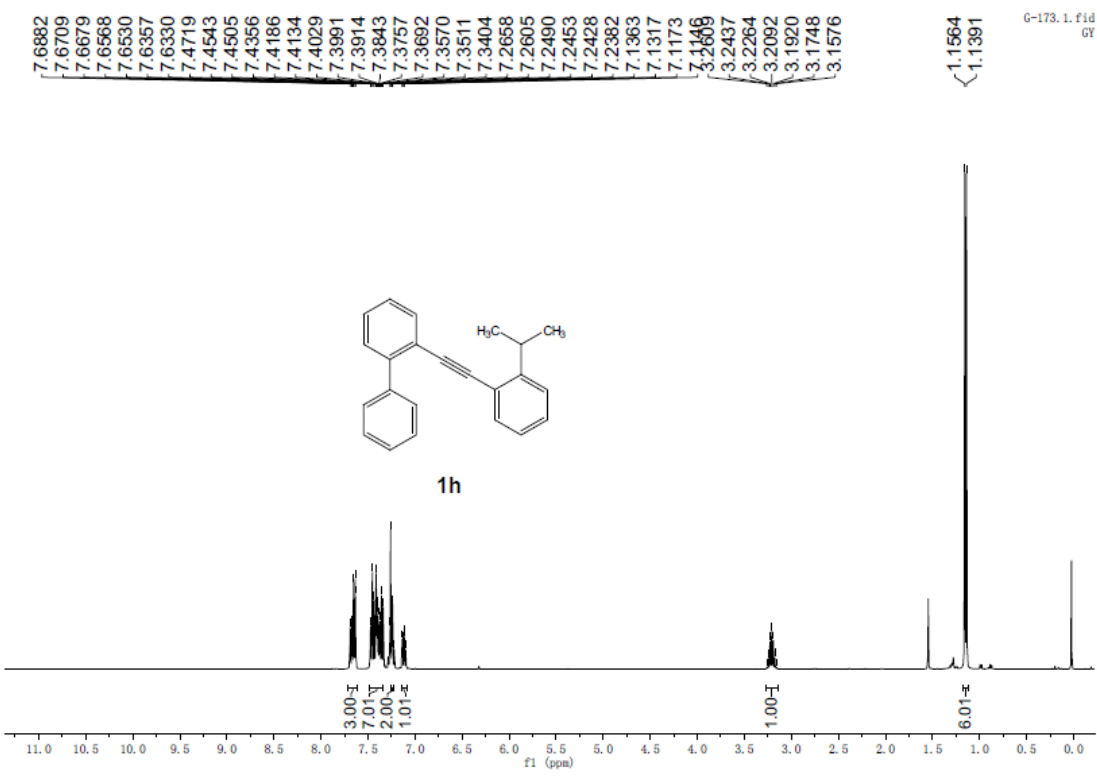

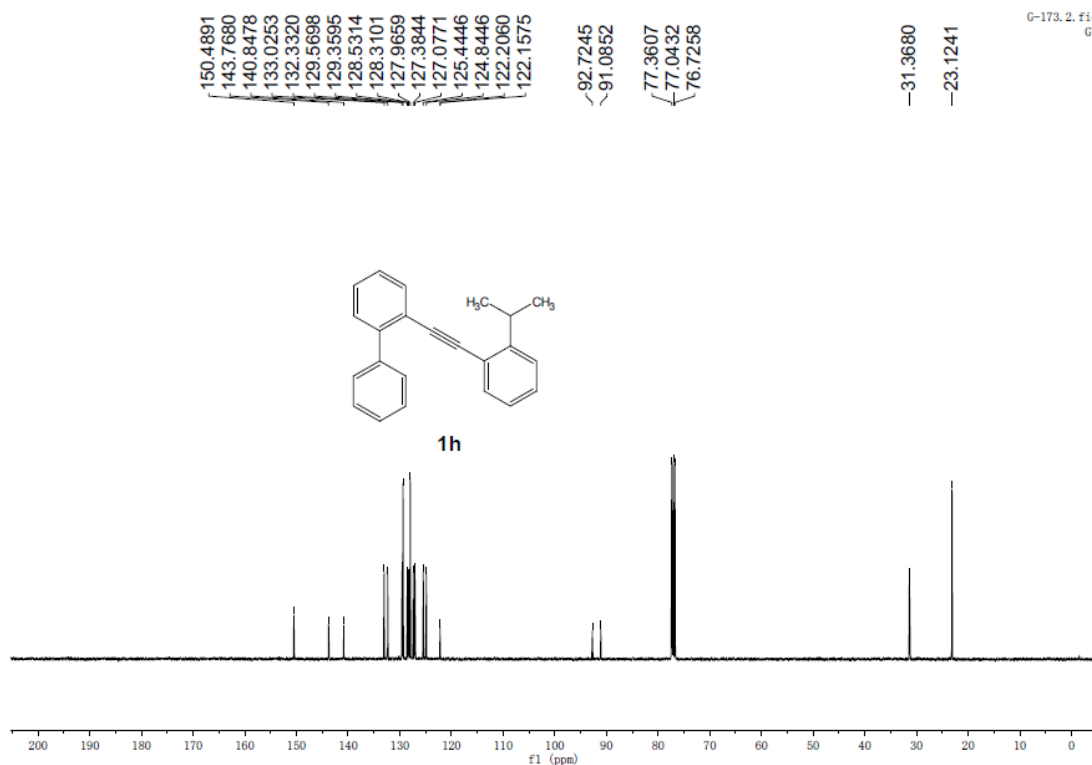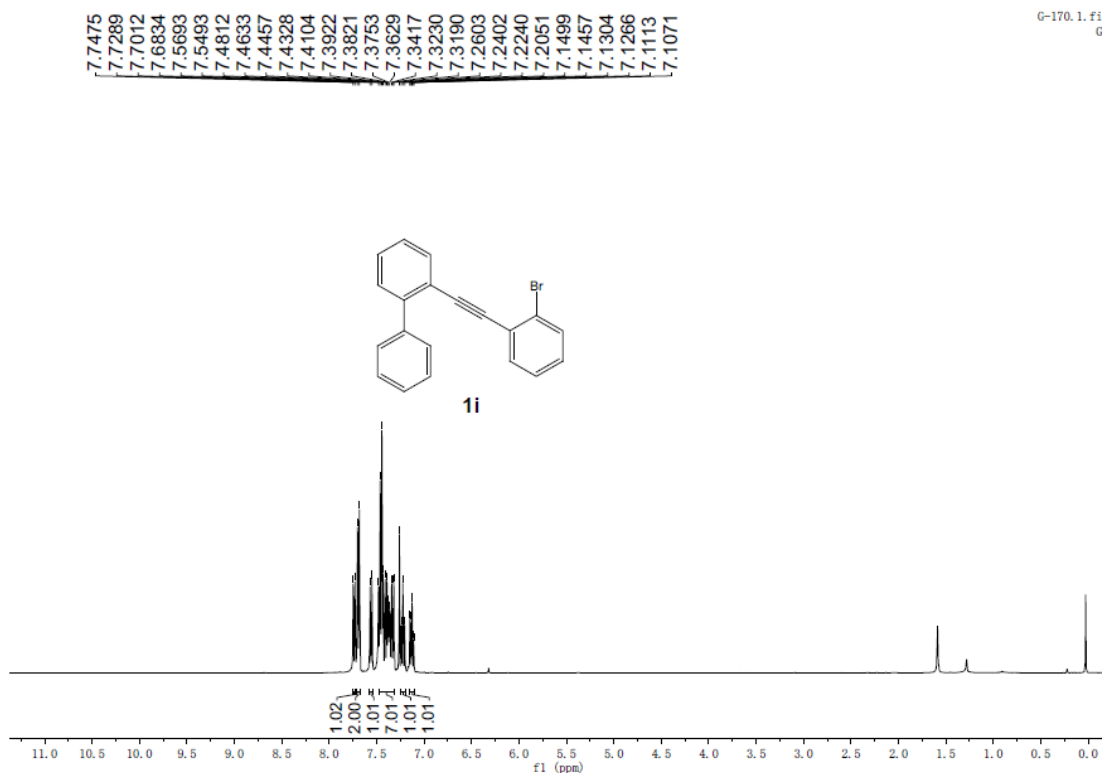

7.8752  
7.8544  
7.8264  
7.8053  
7.7848  
7.7265  
7.7102  
7.6280  
7.6104  
7.5292  
7.5237  
7.5072  
7.4887  
7.4829  
7.4654  
7.4480  
7.4443  
7.4317  
7.4235  
7.4183  
7.4138  
7.4116  
7.4050  
7.4006  
7.3935  
7.3827  
7.2598

G167.1.fid  
G1

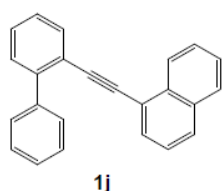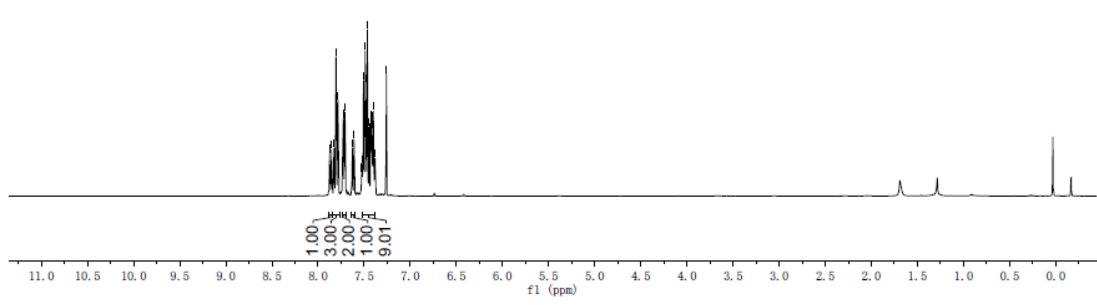

7.6654  
7.6463  
7.6376  
7.6183  
7.4844  
7.4665  
7.4477  
7.4342  
7.4312  
7.4248  
7.4215  
7.4073  
7.3931  
7.3880  
7.3561  
7.3517  
7.3372  
7.3331  
7.3193  
7.3163  
7.2599  
7.2486  
7.2459  
7.2358  
7.2330  
7.1142  
7.1052  
6.9710  
6.9582  
6.9490

G-175.1.fid  
G1

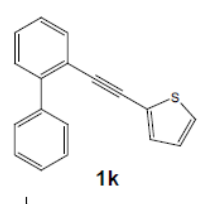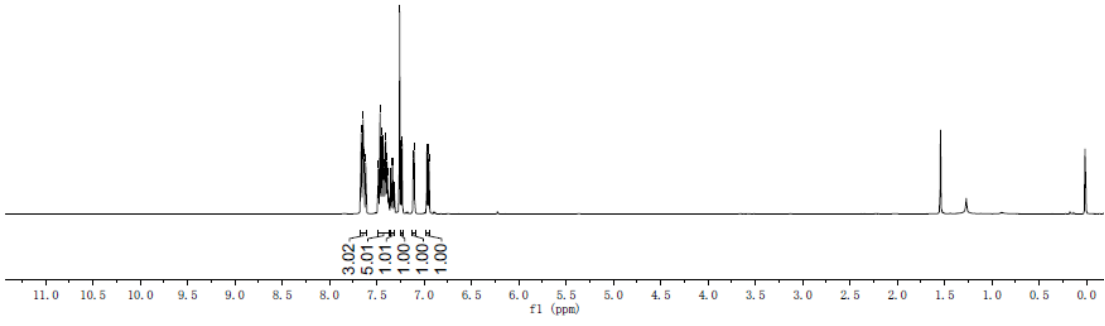

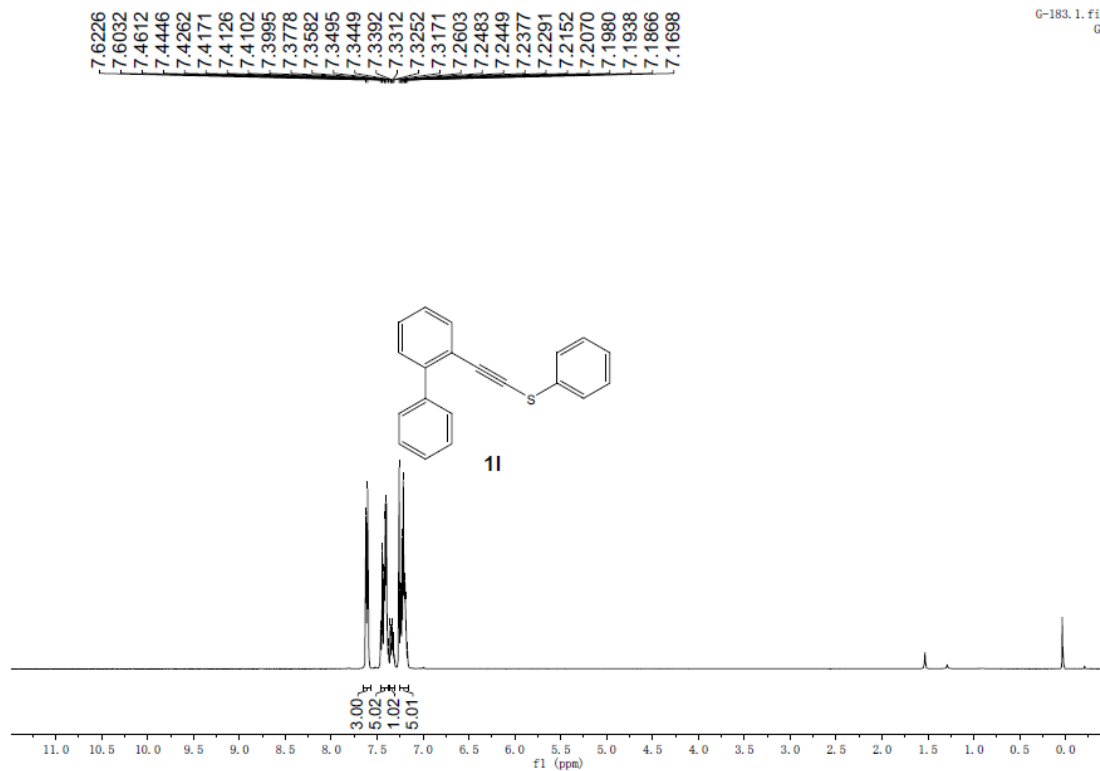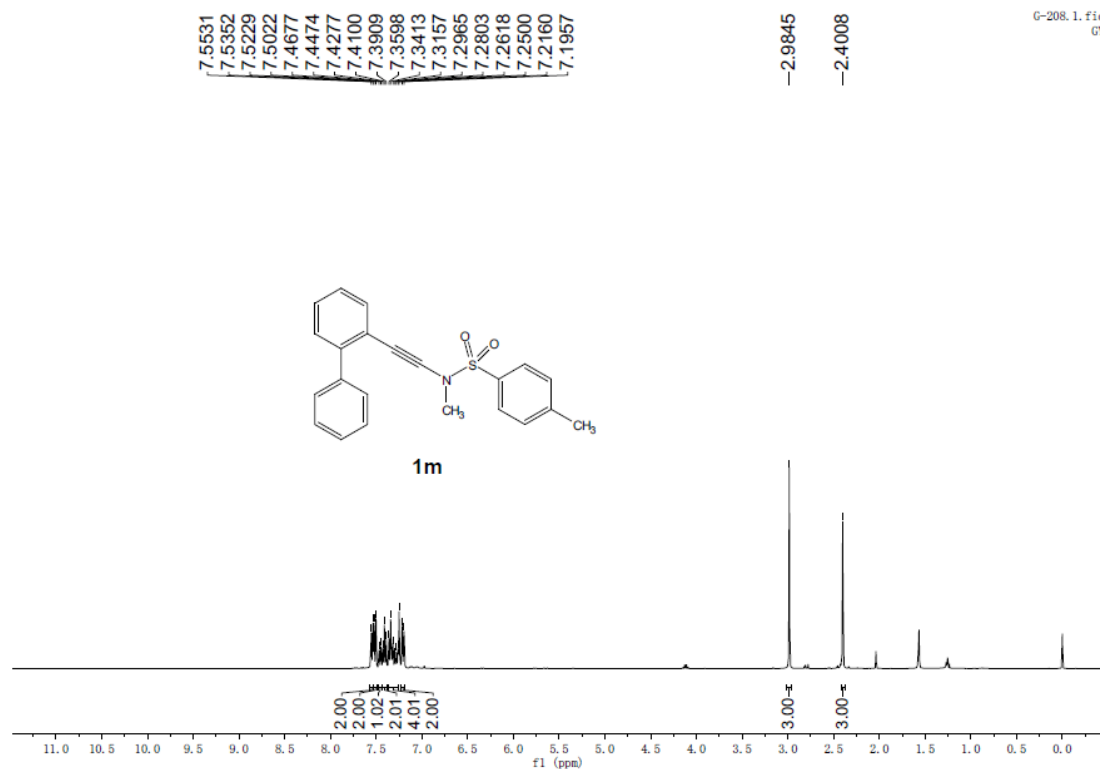

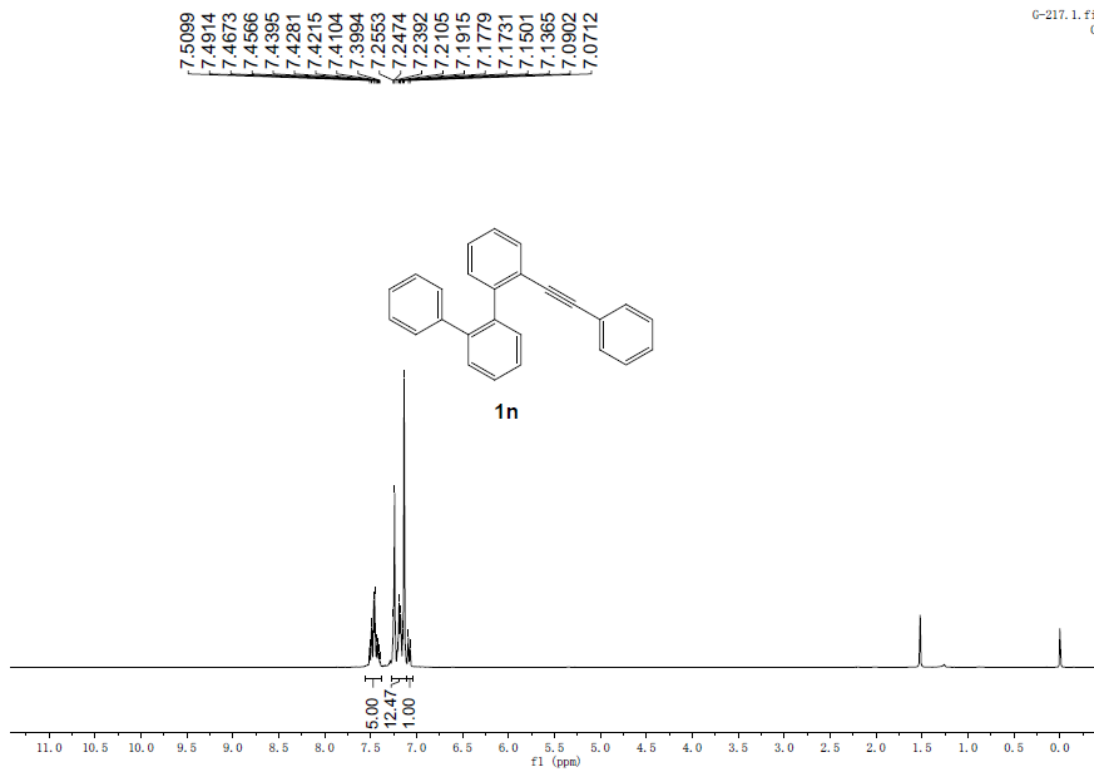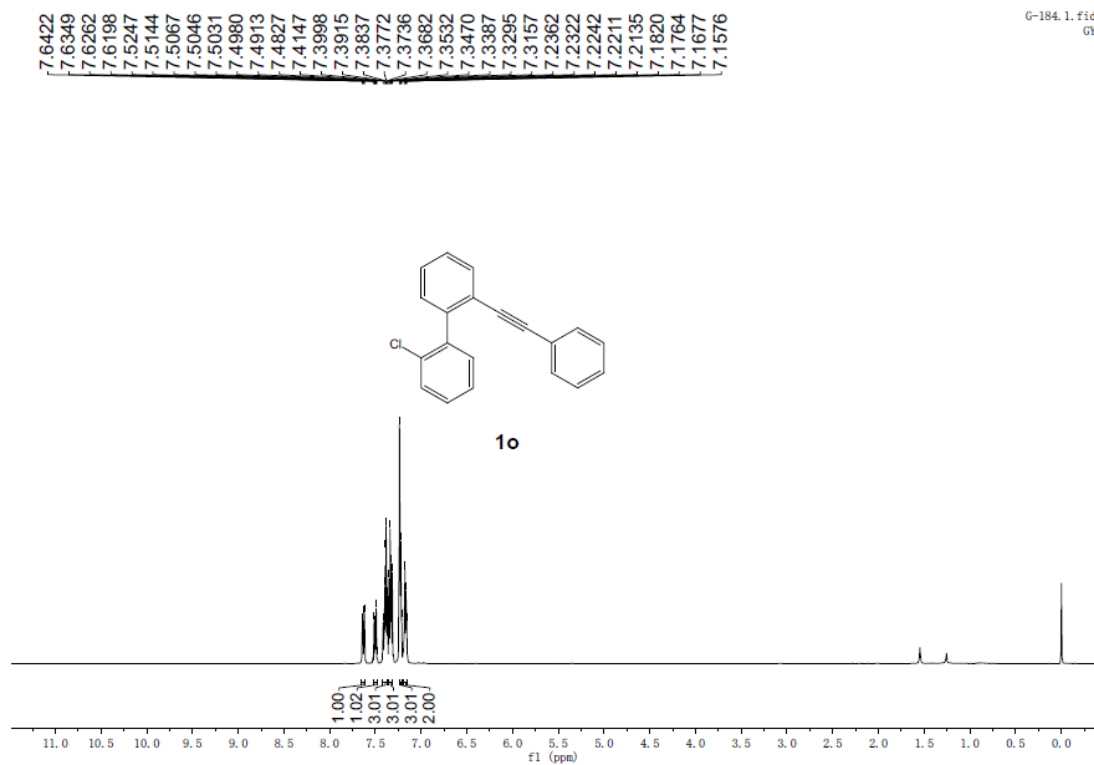

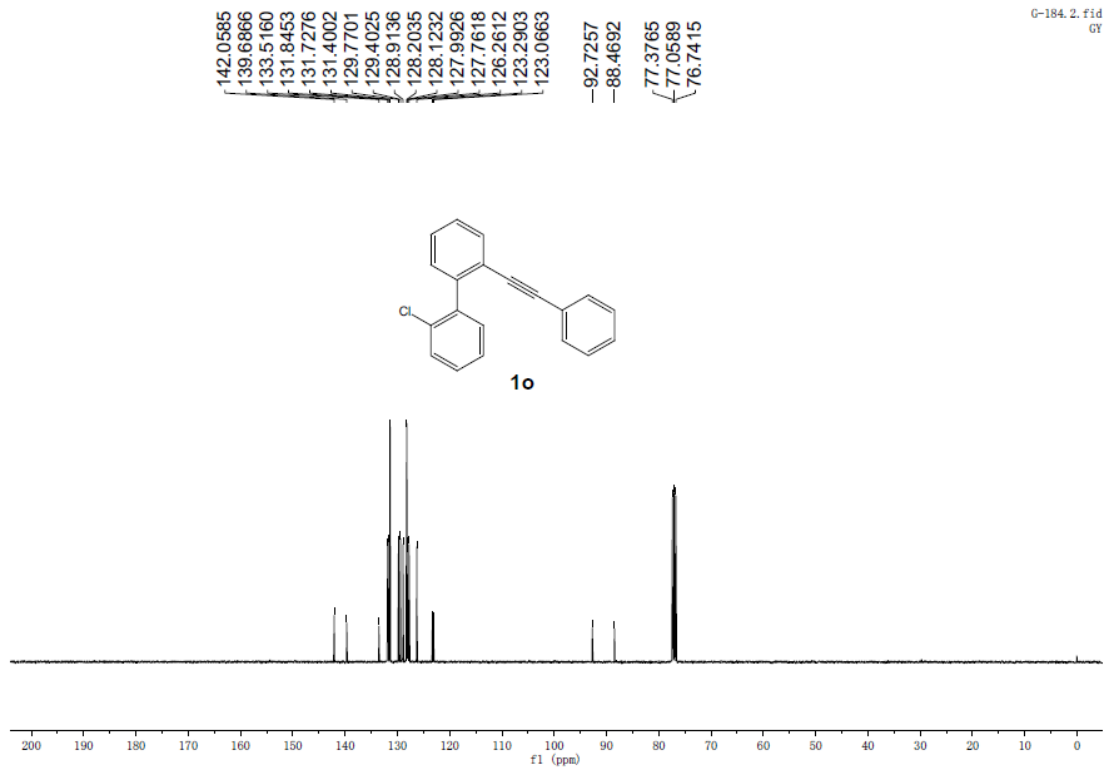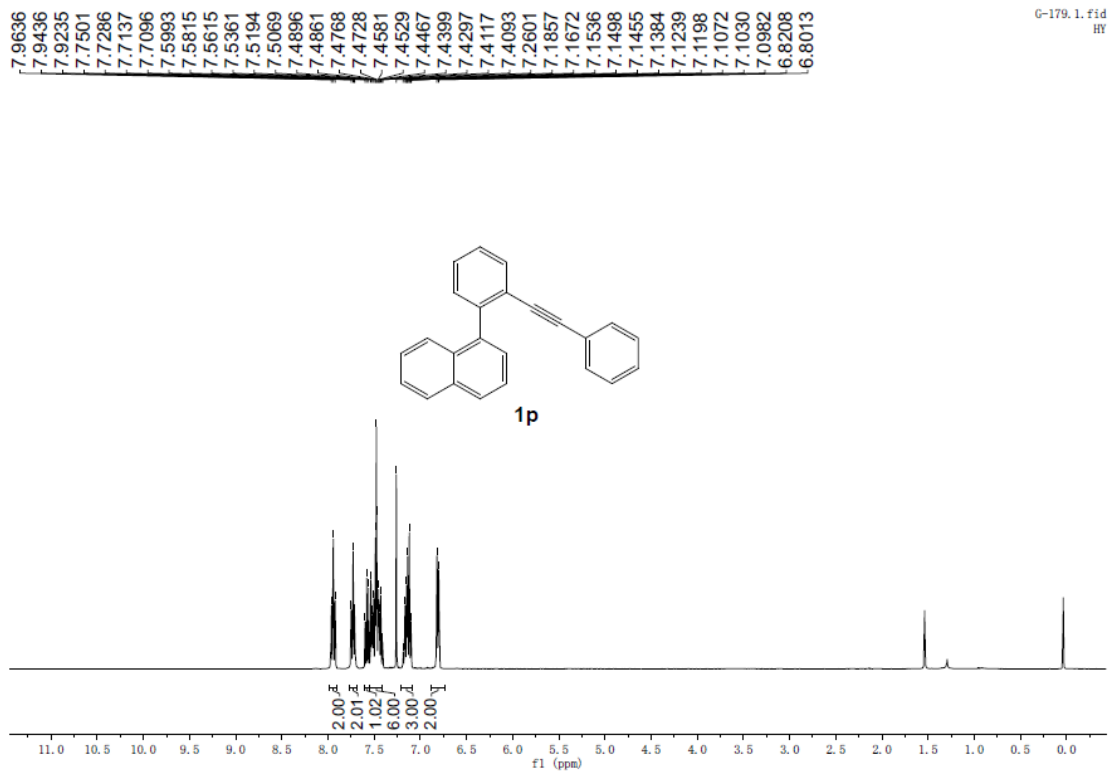

7.6640  
7.6611  
7.6554  
7.6523  
7.6410  
7.6379  
7.6235  
7.6208  
7.6038  
7.6013  
7.5306  
7.5235  
7.5110  
7.5064  
7.3983  
7.3955  
7.3853  
7.3646  
7.3506  
7.3459  
7.3083  
7.3051  
7.2894  
7.2863  
7.2706  
7.2674  
7.2604  
7.1533  
7.1441  
7.1406  
7.1315

G-178.1.fid  
HY

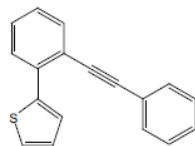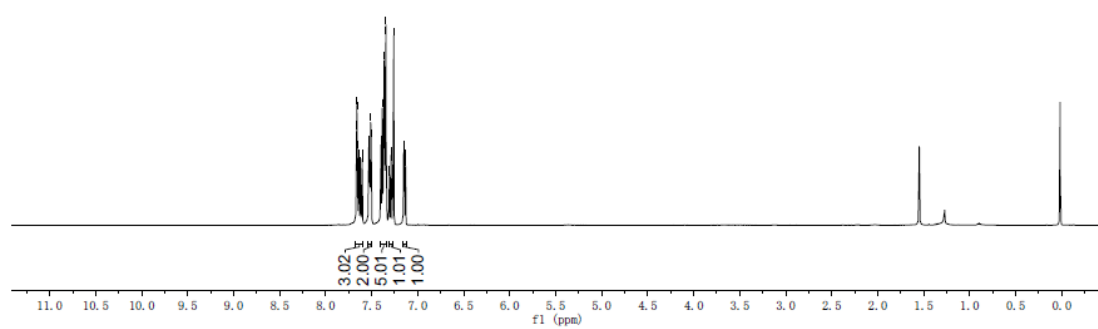

7.6570  
7.6416  
7.4965  
7.4775  
7.4592  
7.4388  
7.4194  
7.4011  
7.3706  
7.3553  
7.3319  
7.3177  
7.2600

G-164.1.fid  
GY

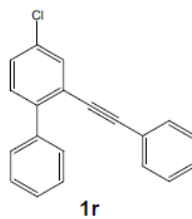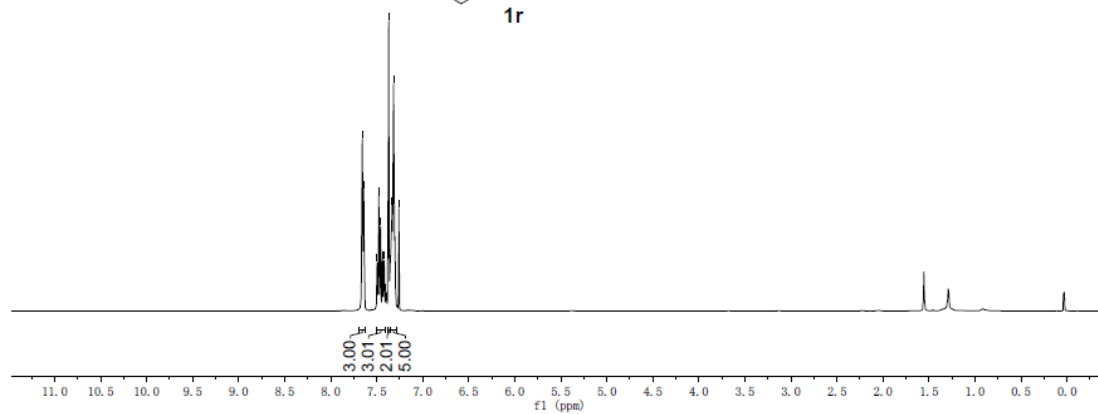



7.6971  
7.6815  
7.6644  
7.5686  
7.5481  
7.5088  
7.4912  
7.4701  
7.4531  
7.4496  
7.4311  
7.4118  
7.3931  
7.3869  
7.3740  
7.3683  
7.3578  
7.3520  
7.2598

G-156.1.fid  
GY

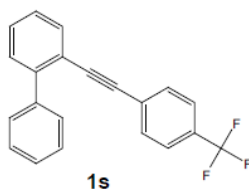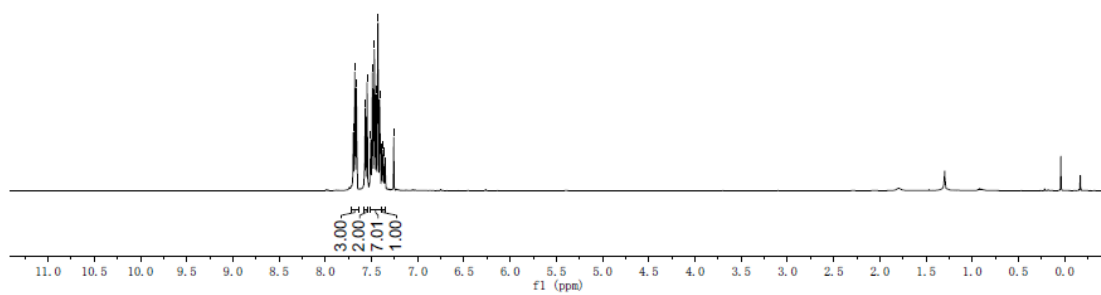

7.6668  
7.6479  
7.6328  
7.6158  
7.5736  
7.5520  
7.4858  
7.4682  
7.4588  
7.4493  
7.4315  
7.4137  
7.3760  
7.3545  
7.2604

G166.1.fid  
GY

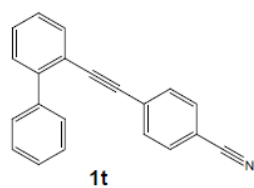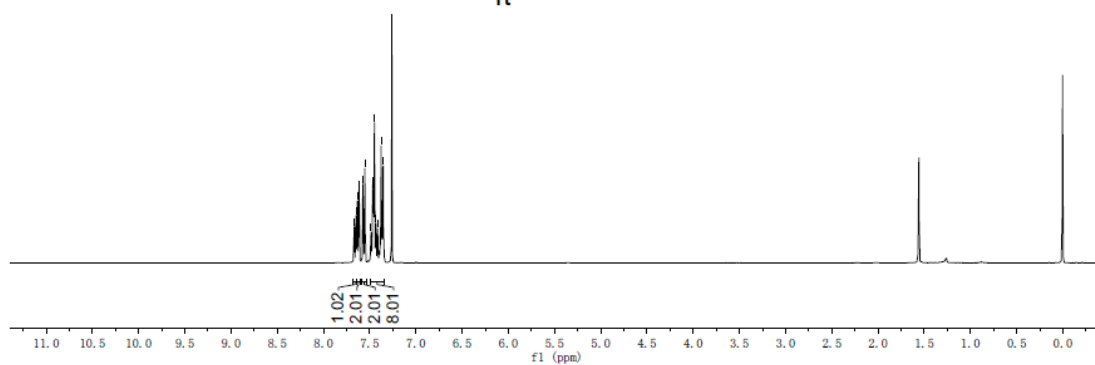

8.1618  
8.1395  
7.6829  
7.6639  
7.6389  
7.6219  
7.4959  
7.4785  
7.4747  
7.4605  
7.4427  
7.4300  
7.4251  
7.4077  
7.3960  
7.3876  
7.3767  
7.3638  
7.3548  
7.2603

G-161.1.fid  
GY

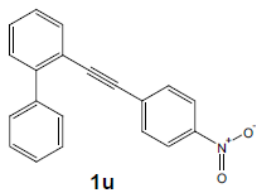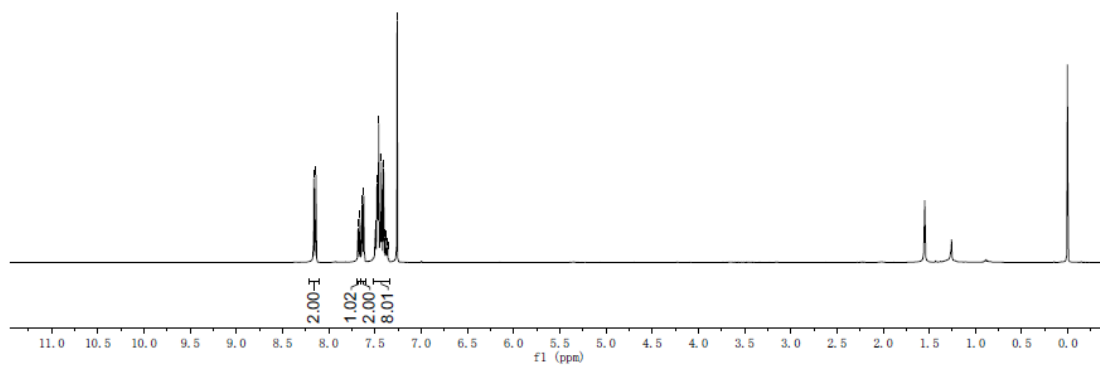

8.5770  
8.5656  
7.7586  
7.7397  
7.6790  
7.6616  
7.6026  
7.5836  
7.5640  
7.4810  
7.4633  
7.4338  
7.4107  
7.3923  
7.3700  
7.3596  
7.3506  
7.3412  
7.3287  
7.2602  
7.1930  
7.1732

G185.1.fid  
GY

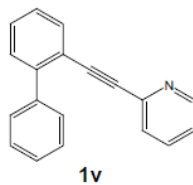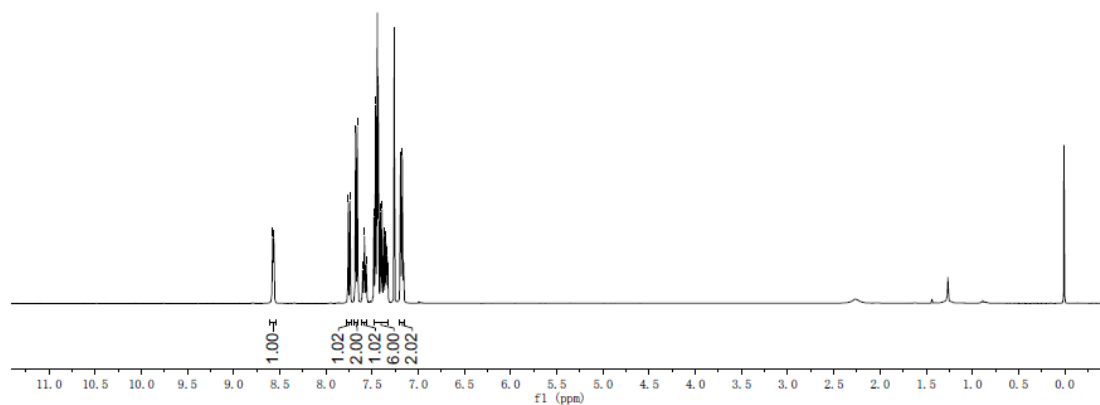

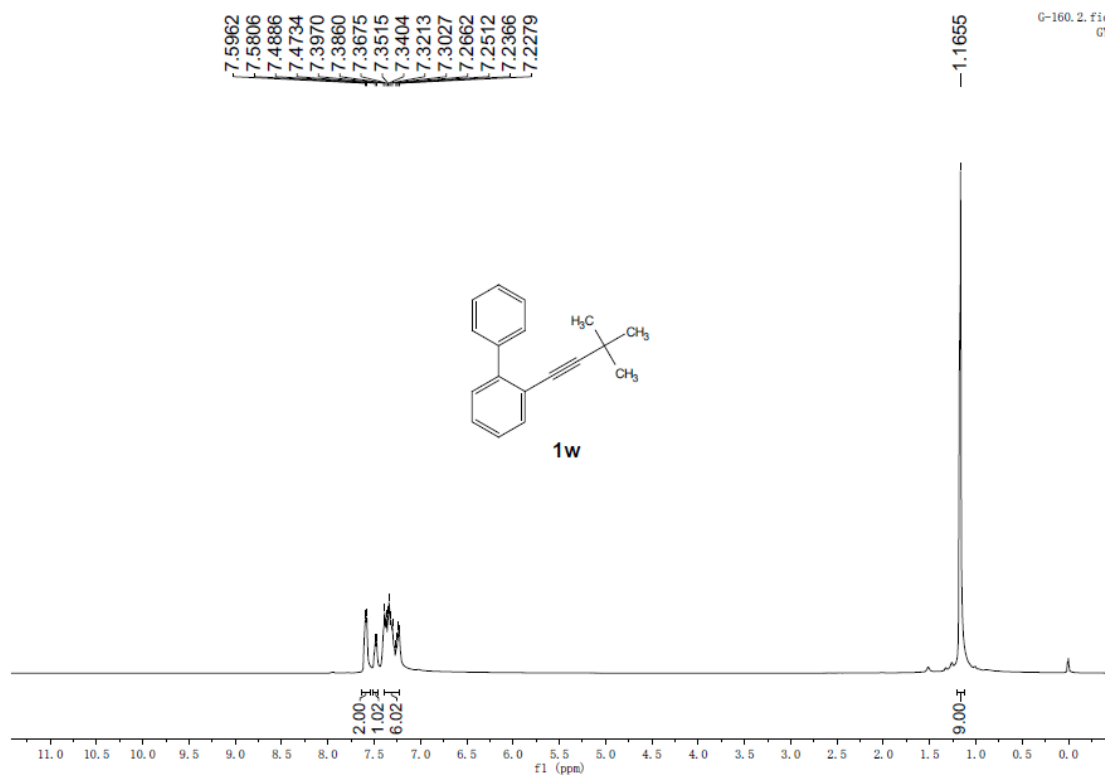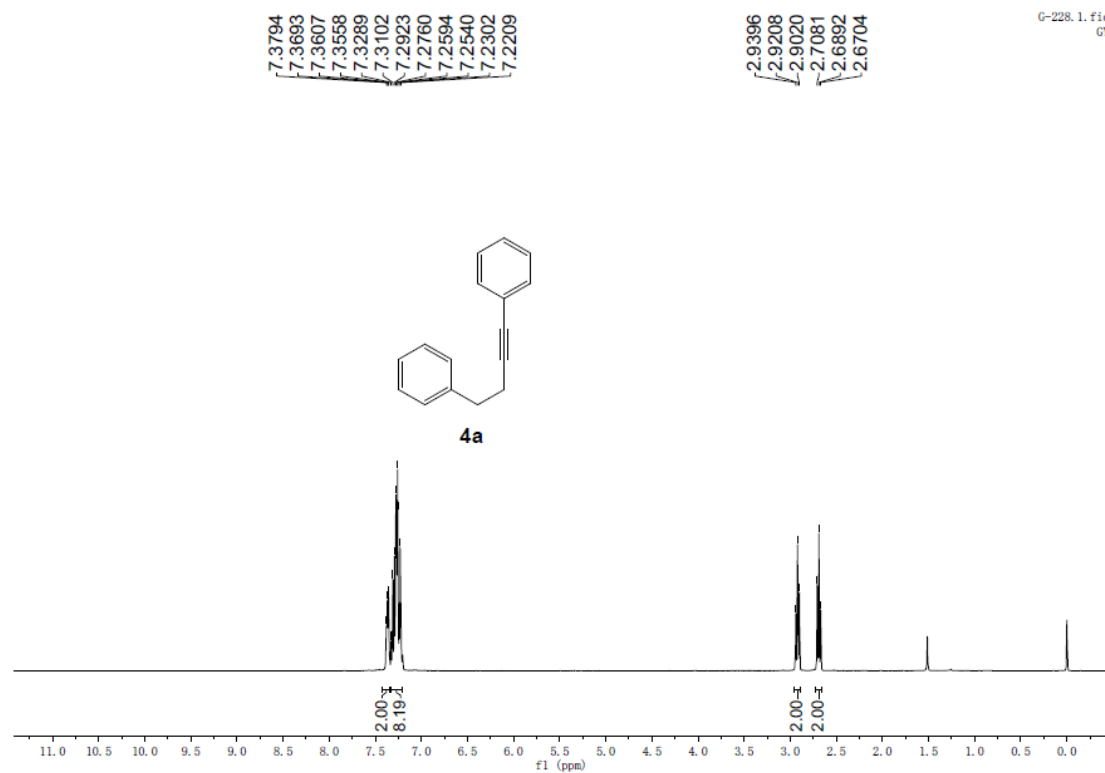

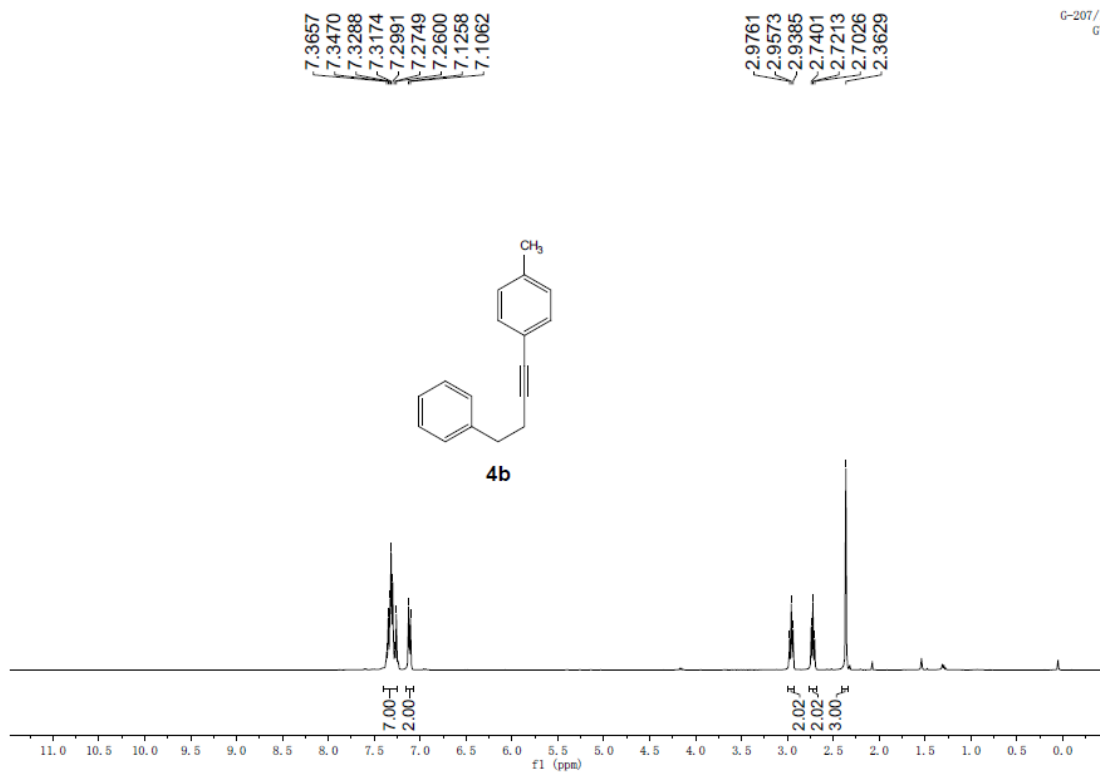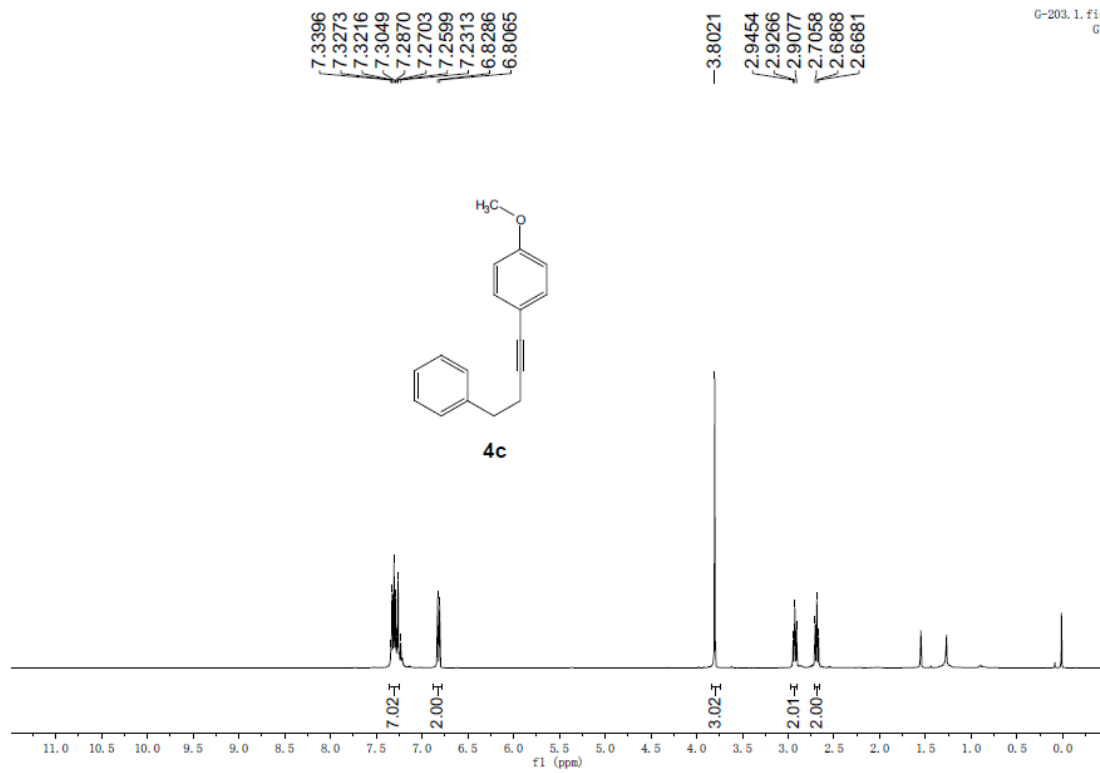

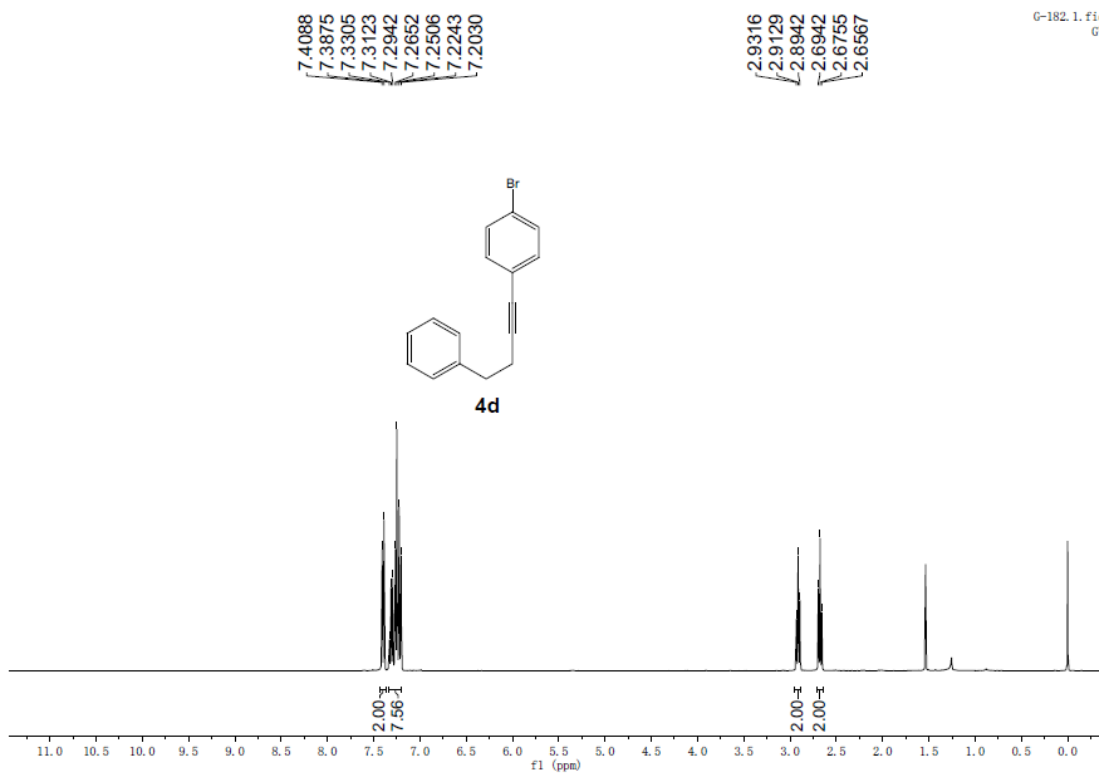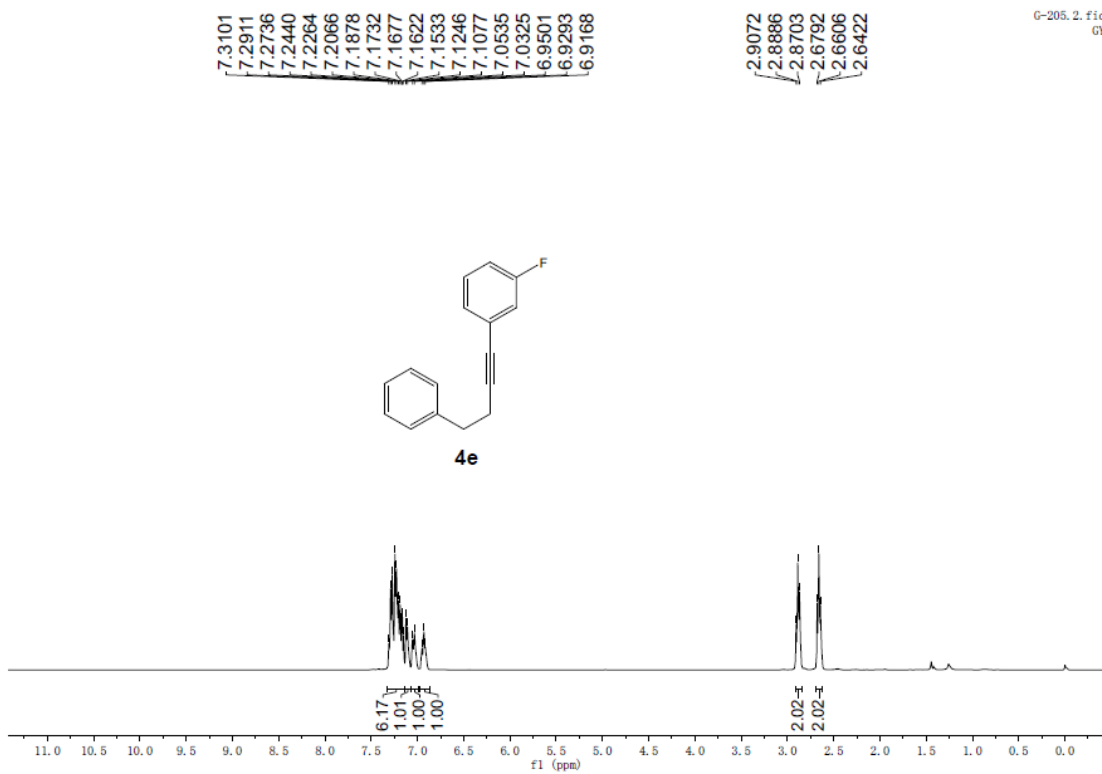

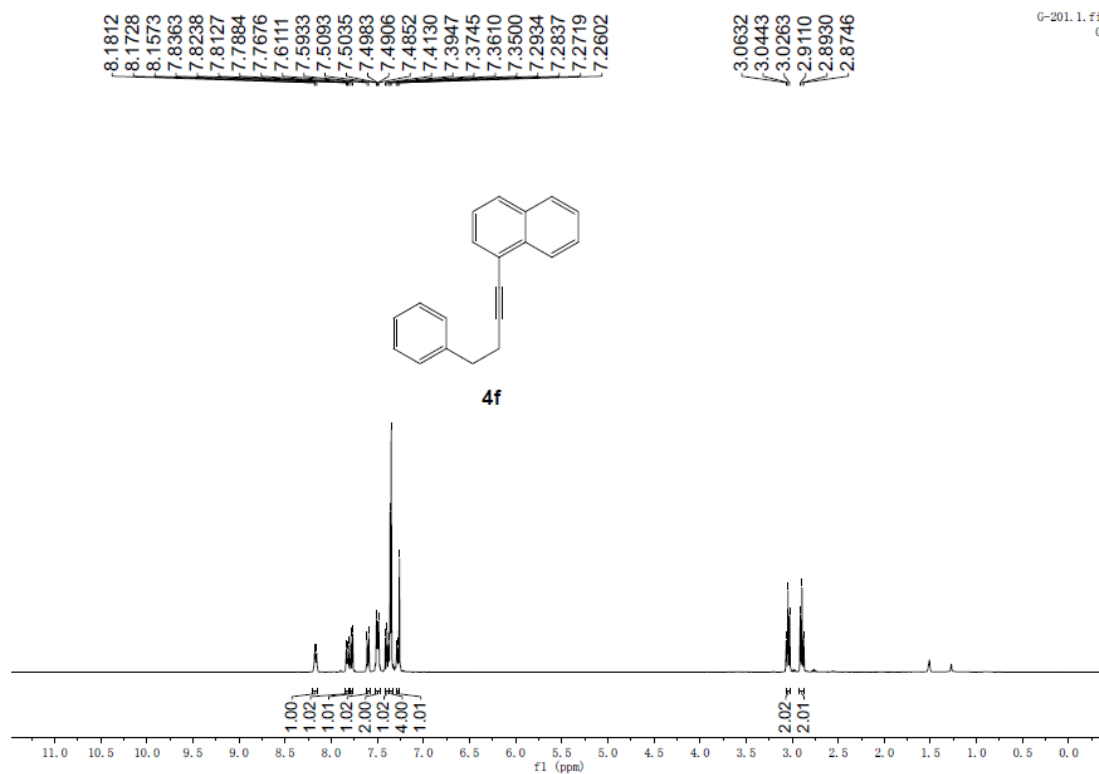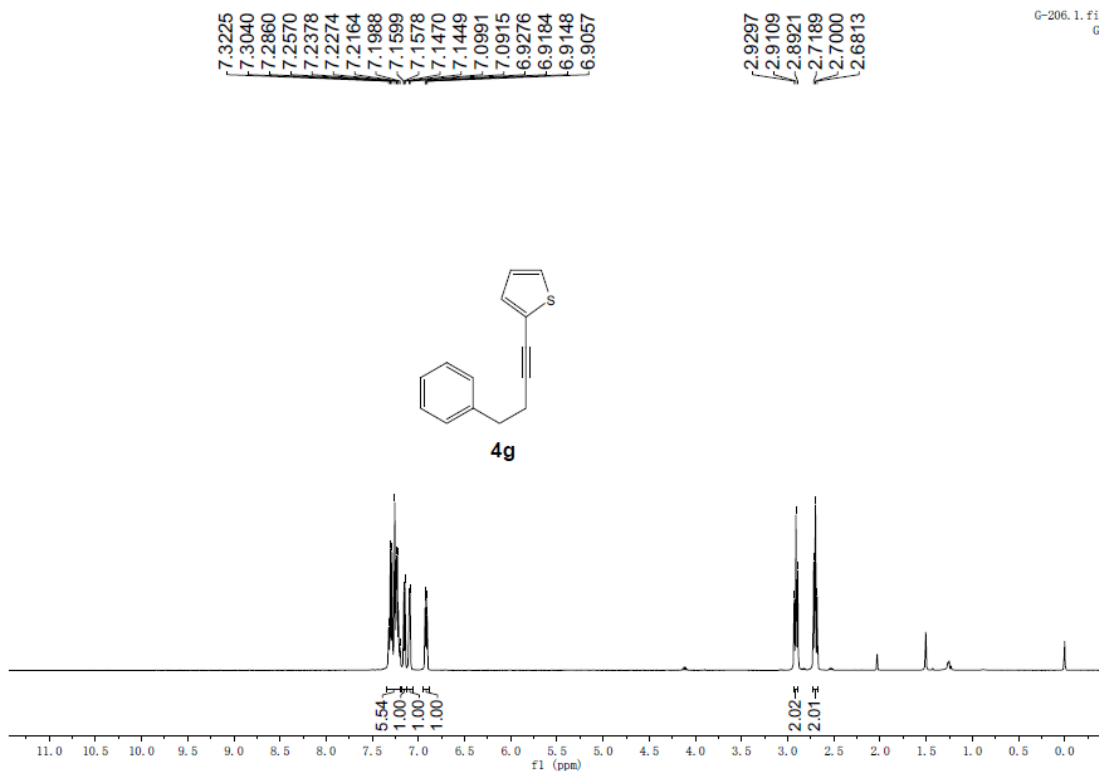

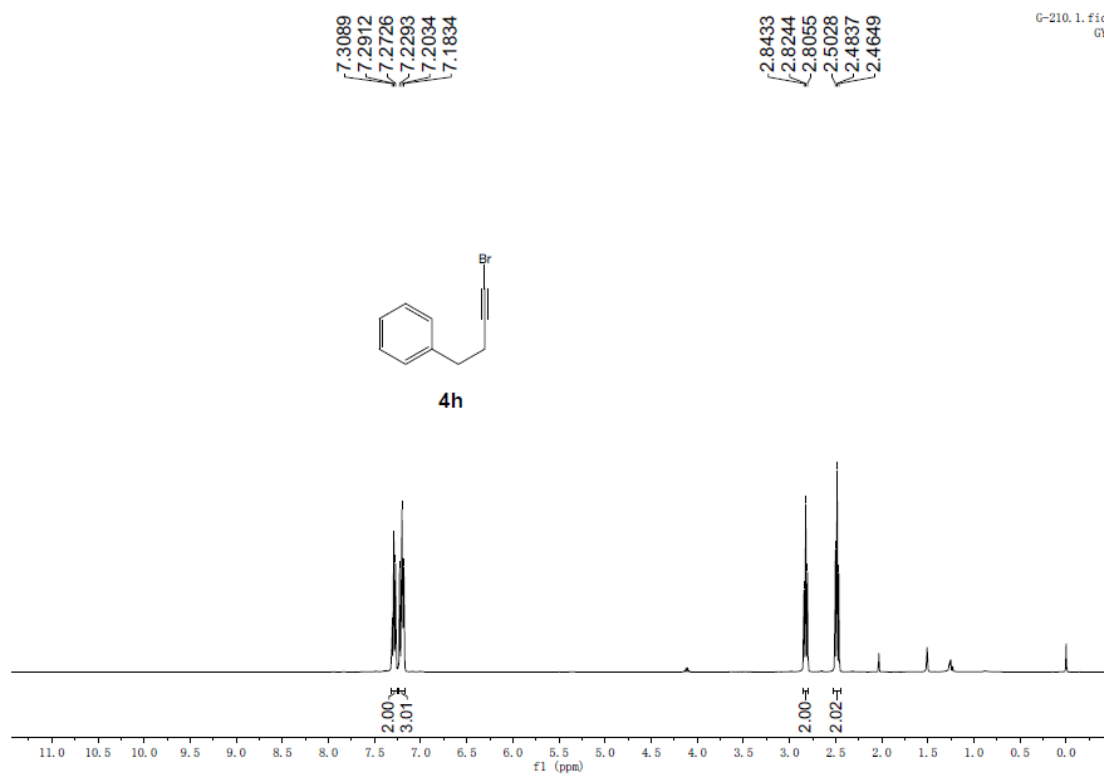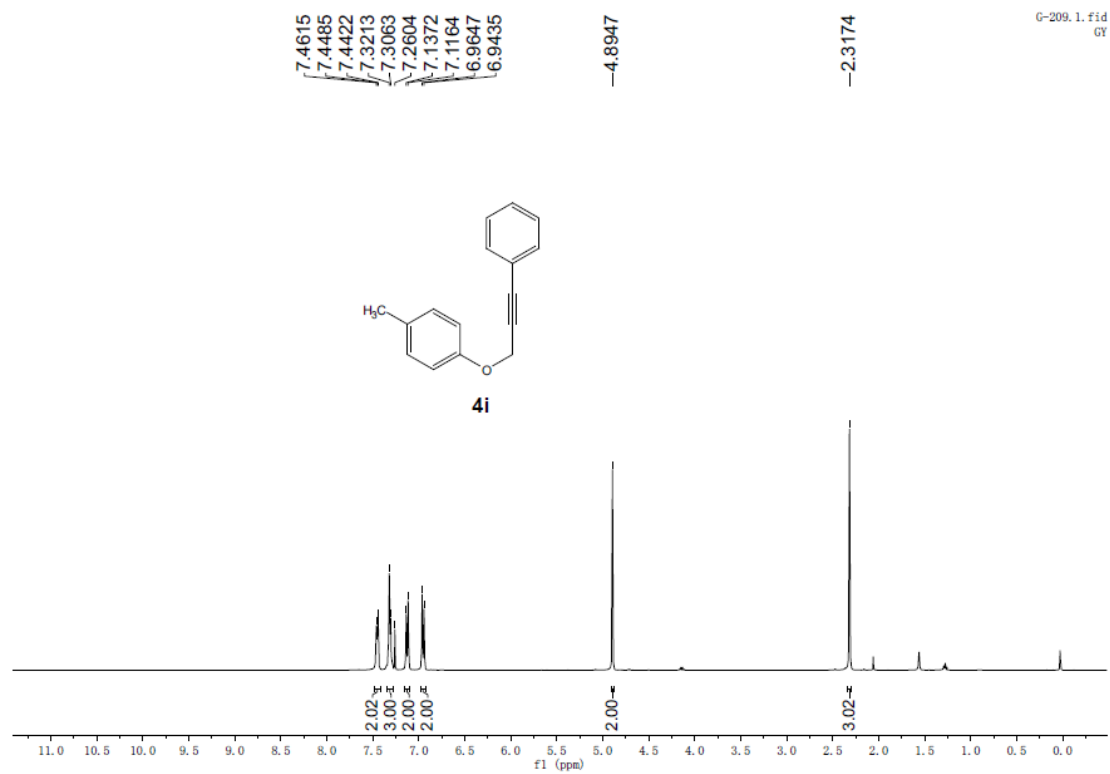

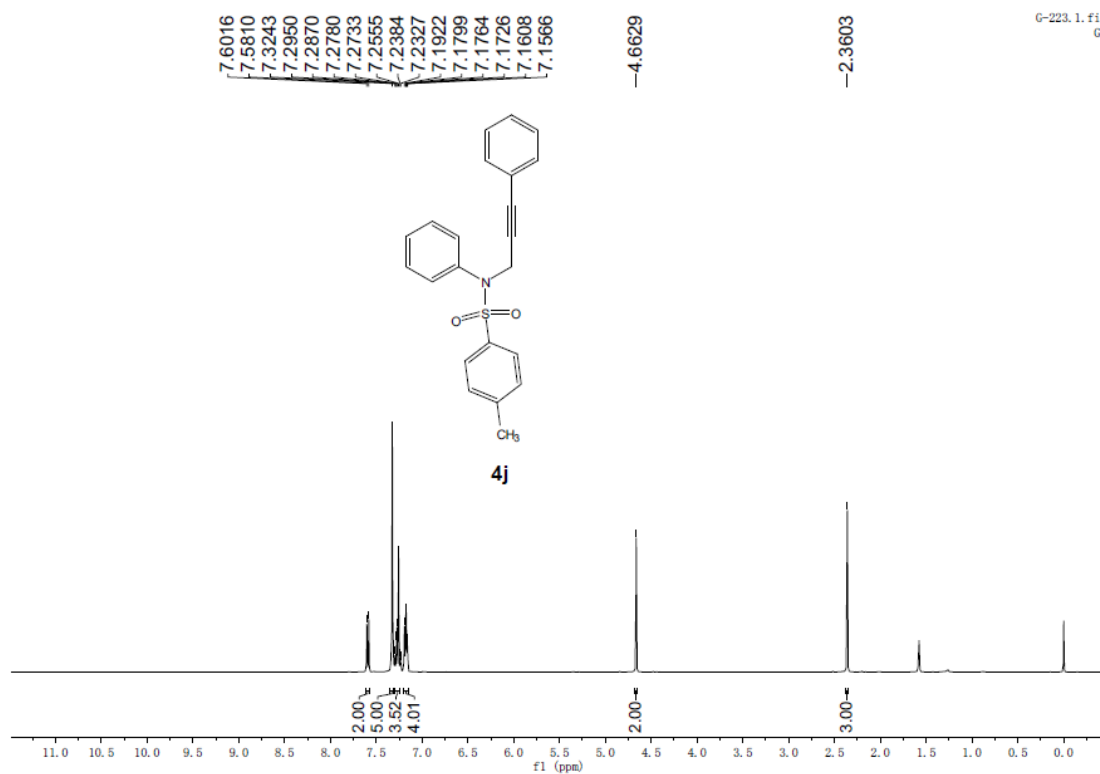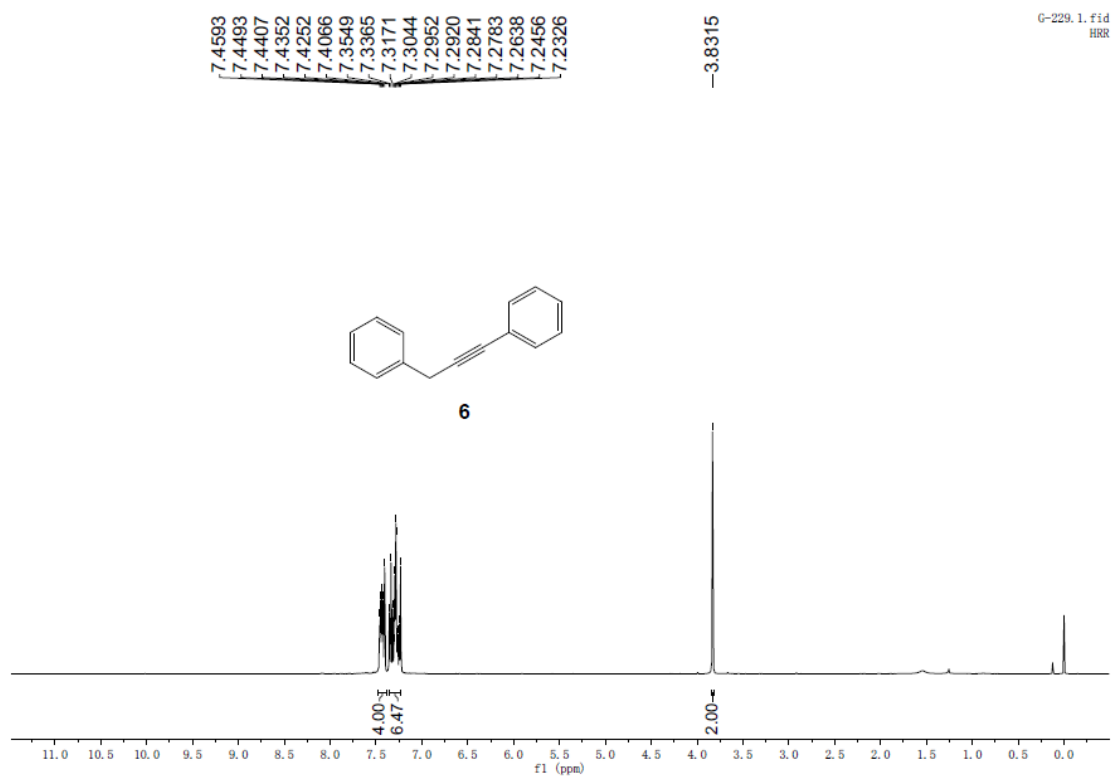



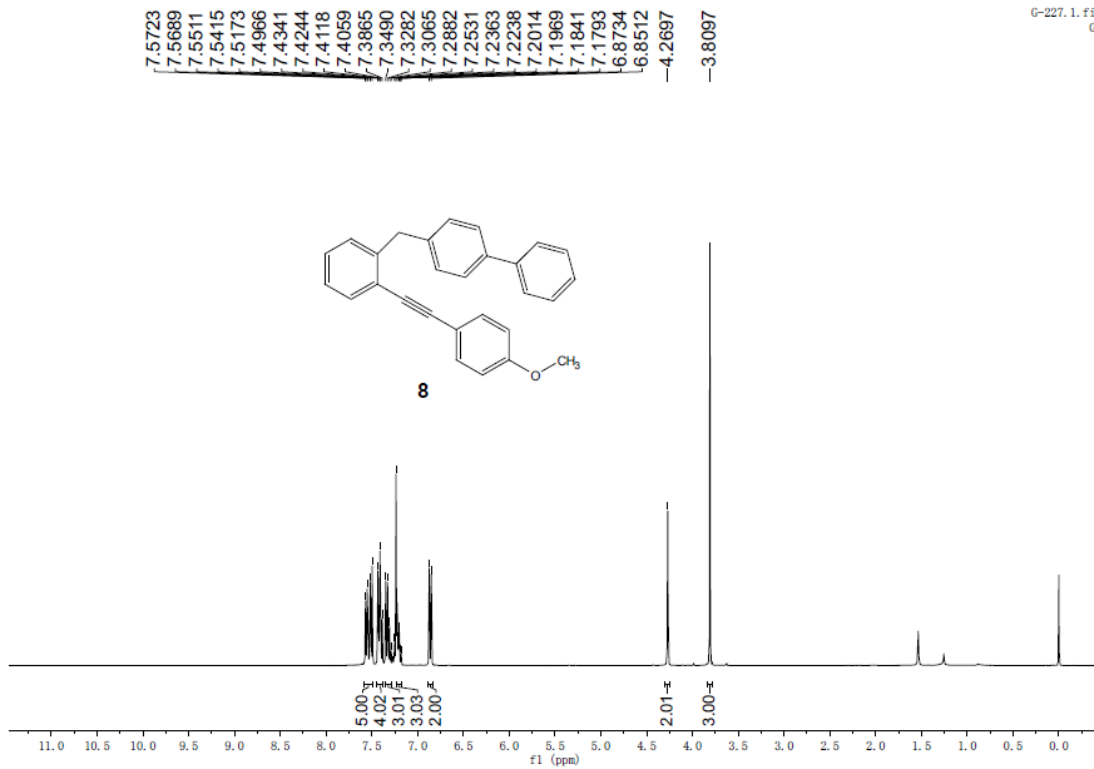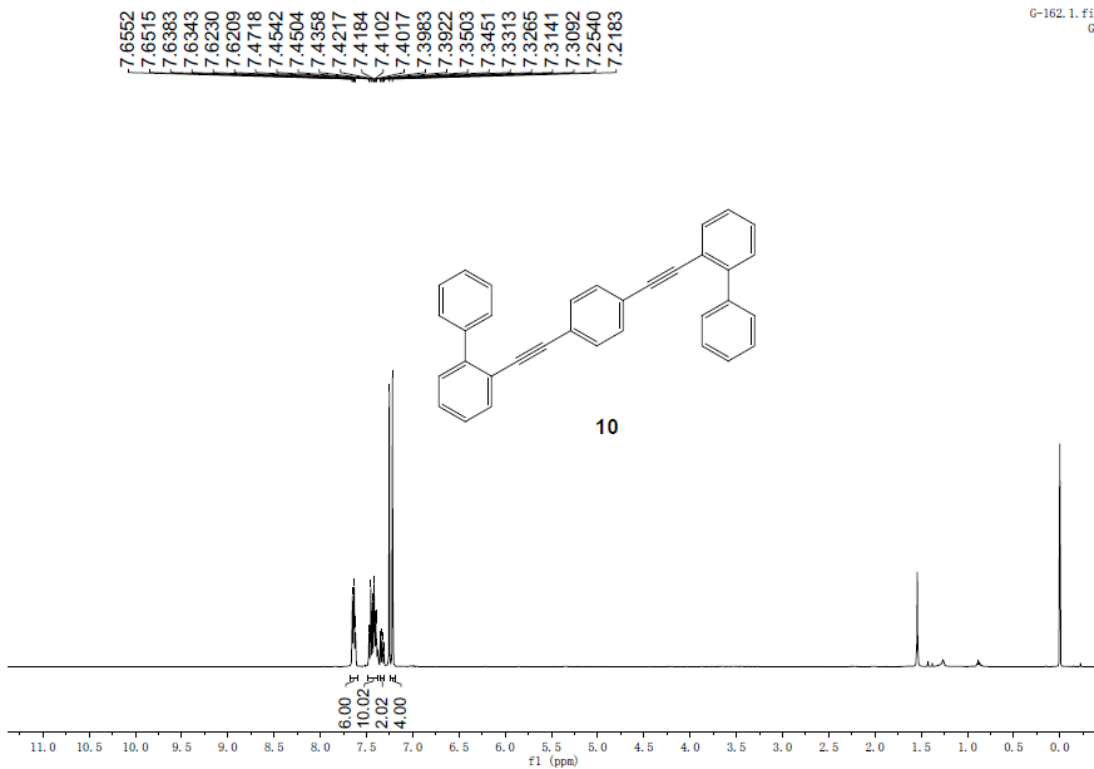

8.8168  
8.7984  
8.7841  
8.7631  
8.6518  
8.6330  
7.8481  
7.8338  
7.8304  
7.8209  
7.8158  
7.8109  
7.8017  
7.7978  
7.7839  
7.7804  
7.7674  
7.7632  
7.7468  
7.7306  
7.7262  
7.6065  
7.5917  
7.5735  
7.5587  
7.5368  
7.5151  
7.4963  
7.4911  
7.4745  
7.3858  
7.3667  
7.2491

G-127. 1. fid  
GY

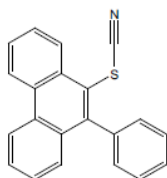

3a

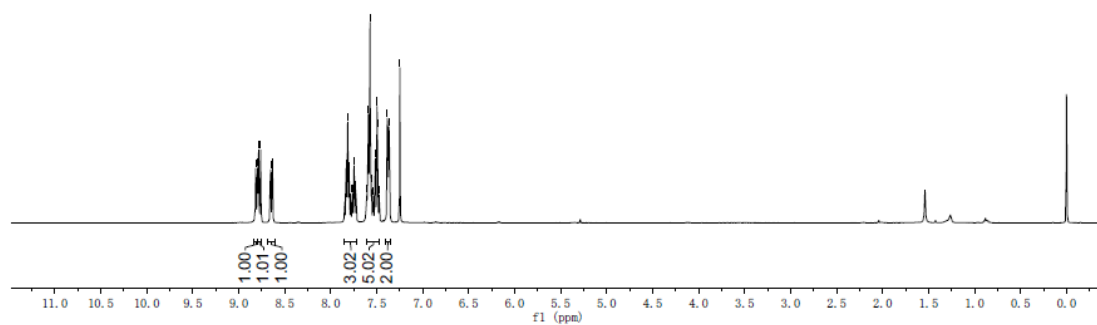

147.5793  
138.9623  
131.7954  
131.5238  
131.1828  
130.3666  
129.6863  
129.0838  
128.8429  
128.6325  
128.3548  
128.2998  
127.8851  
127.2890  
126.8145  
123.2057  
122.7533  
119.4231  
111.2497  
77.3278  
77.0104  
76.6929

G-127. 2. fid  
GY

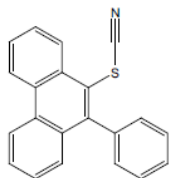

3a

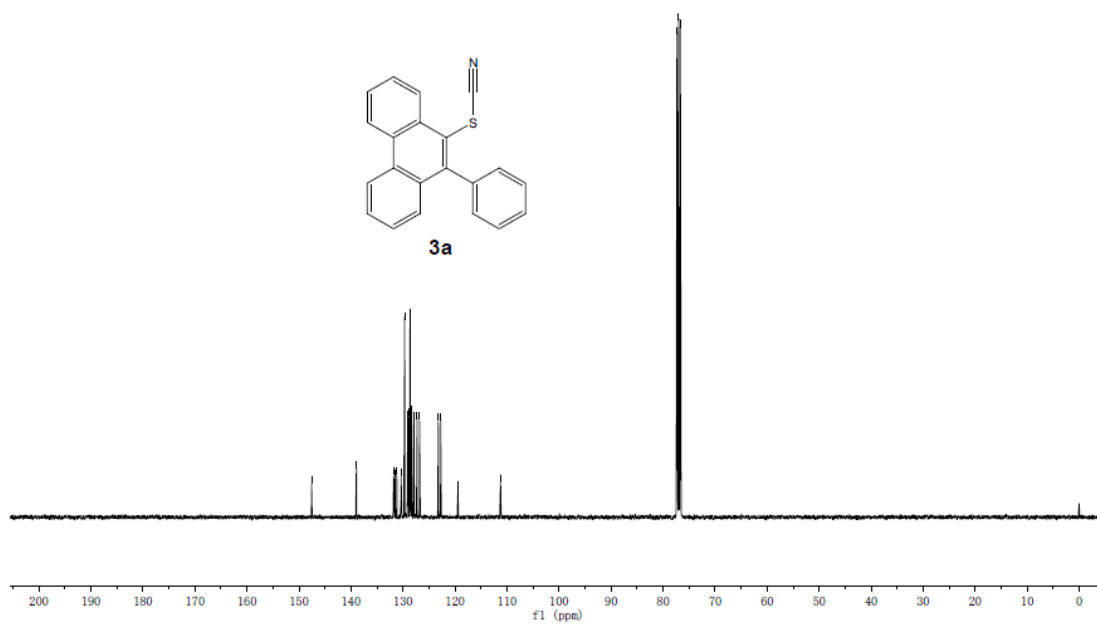

8.7136  
8.6931  
8.6801  
8.6590  
8.5590  
8.5400  
7.7492  
7.7351  
7.7316  
7.7169  
7.7125  
7.6982  
7.6947  
7.6806  
7.6771  
7.6667  
7.6607  
7.6519  
7.6459  
7.6400  
7.6308  
7.6251  
7.4527  
7.4365  
7.4335  
7.4212  
7.4190  
7.3982  
7.3374  
7.3172  
7.2033  
7.1832  
7.1594  
2.7688  
2.7498  
2.7308  
2.7118  
1.3177  
1.2987  
1.2797

G-198.1.fid  
GY

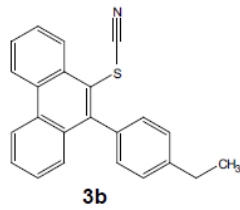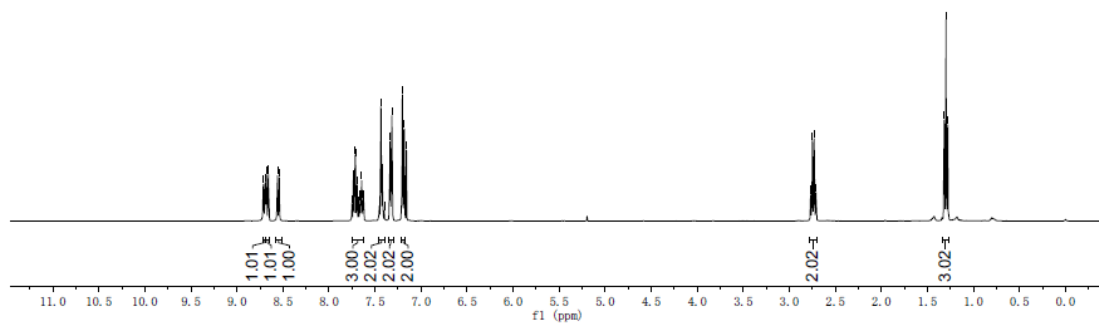

147.7637  
144.4230  
136.2177  
132.0251  
131.5406  
131.1816  
130.4593  
129.6623  
129.2049  
128.7784  
128.2489  
128.0710  
127.9910  
127.2409  
126.8425  
123.2023  
122.7315  
119.5367  
111.3888  
77.3578  
77.0403  
76.7228

G-198.2.fid  
GY

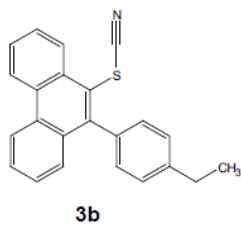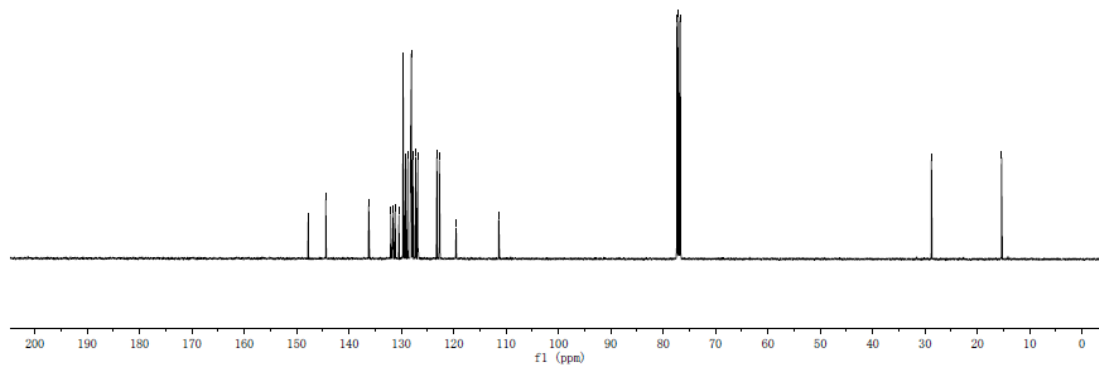

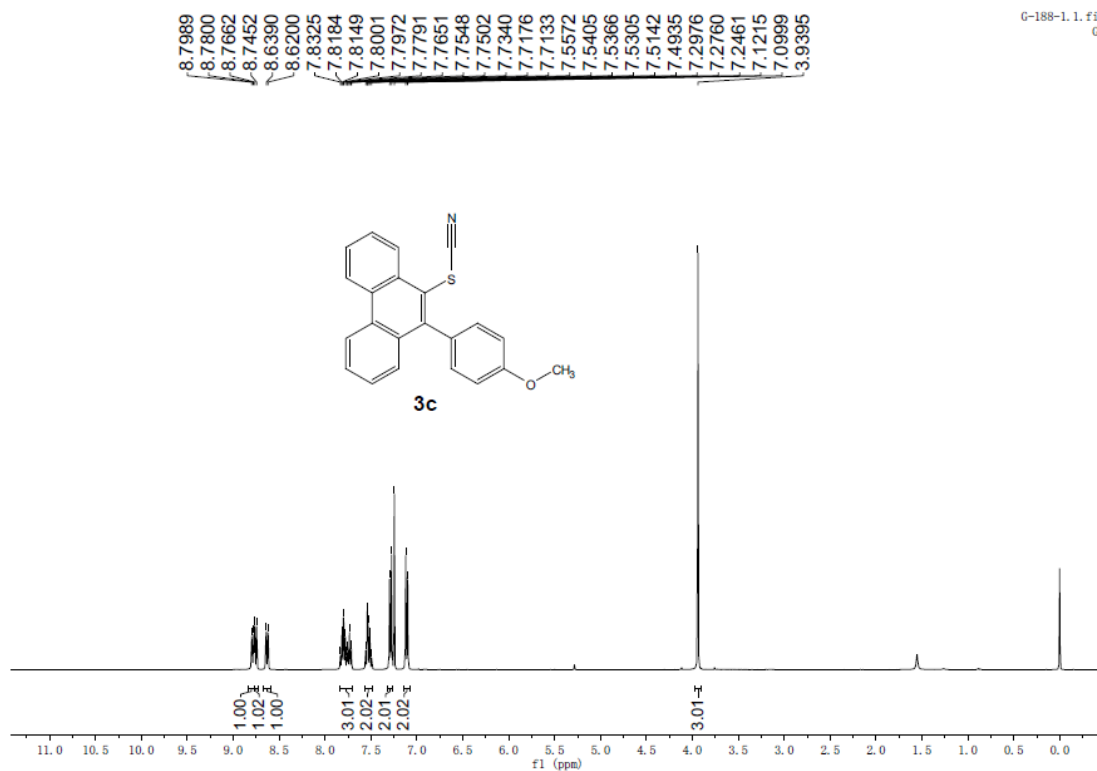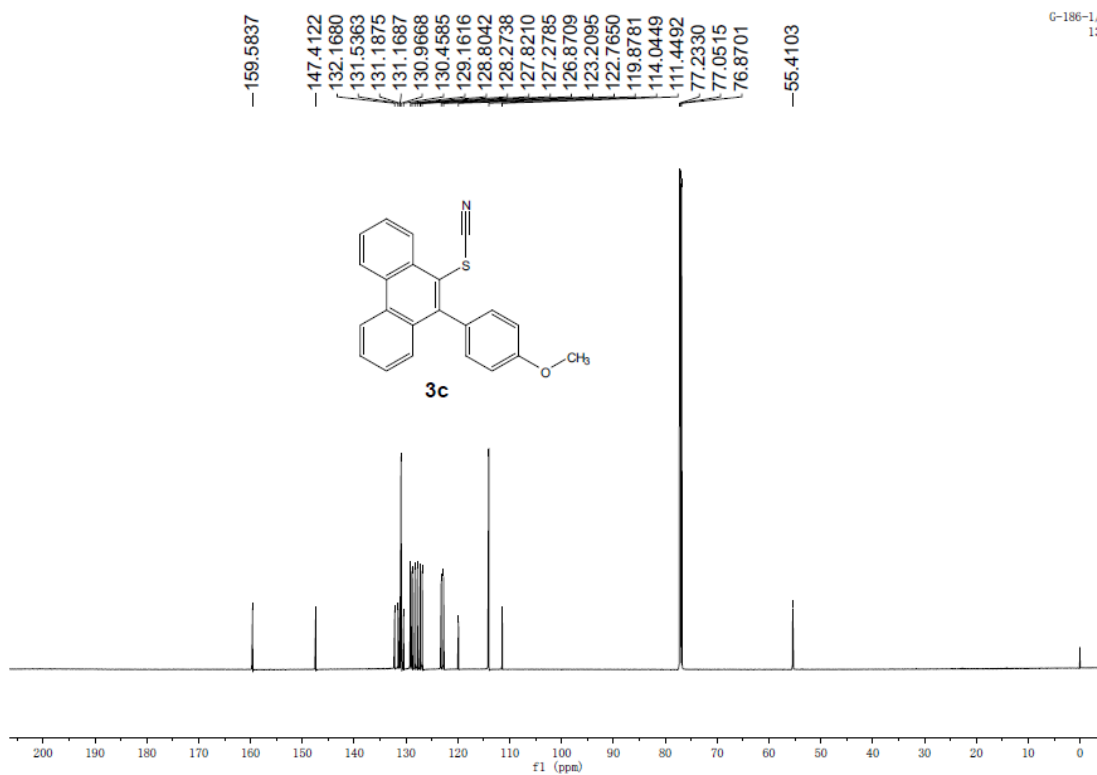

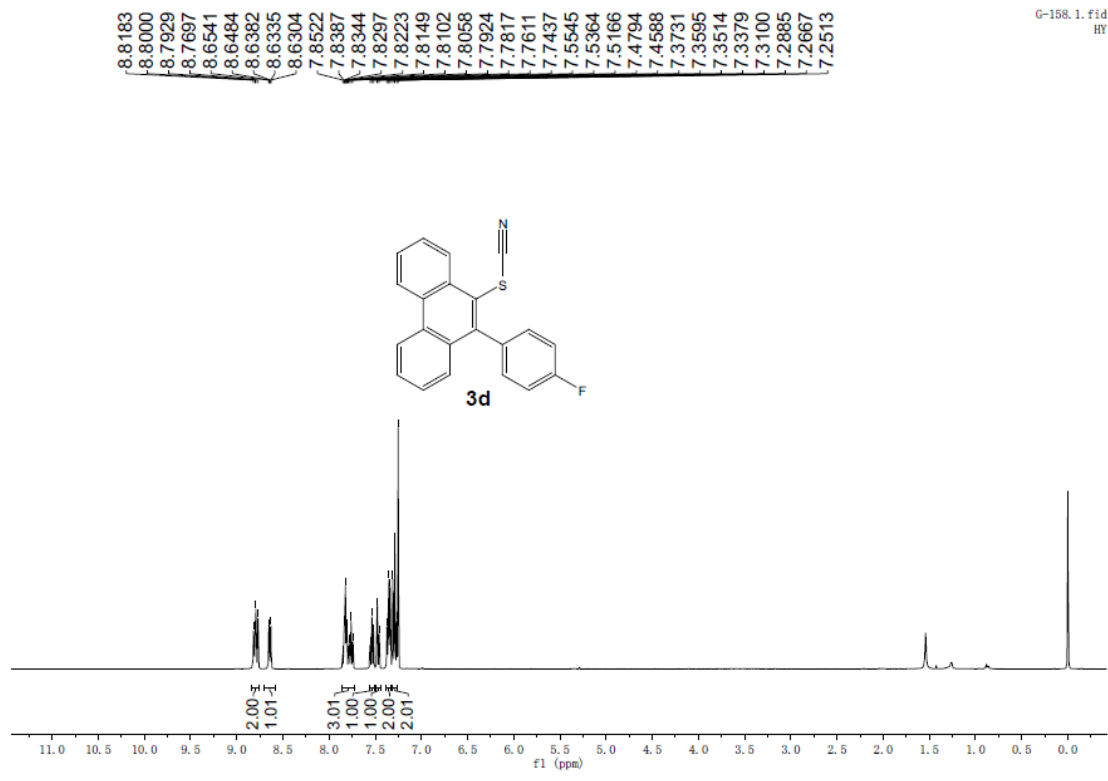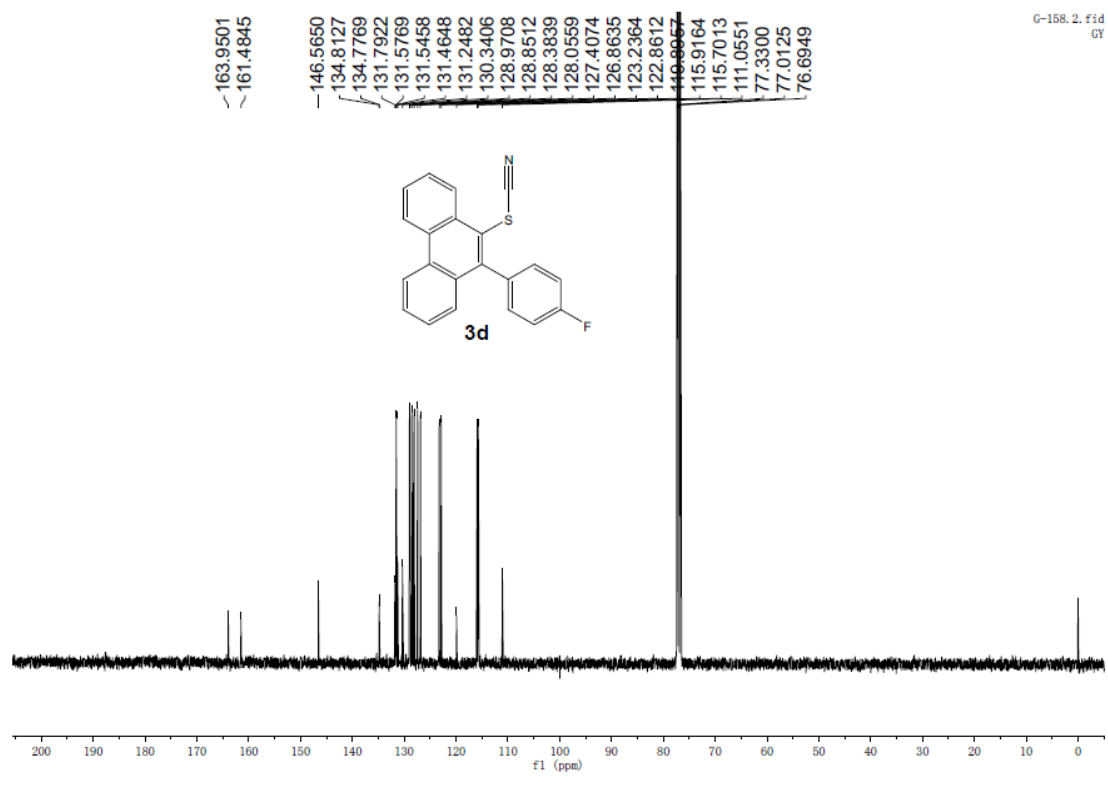

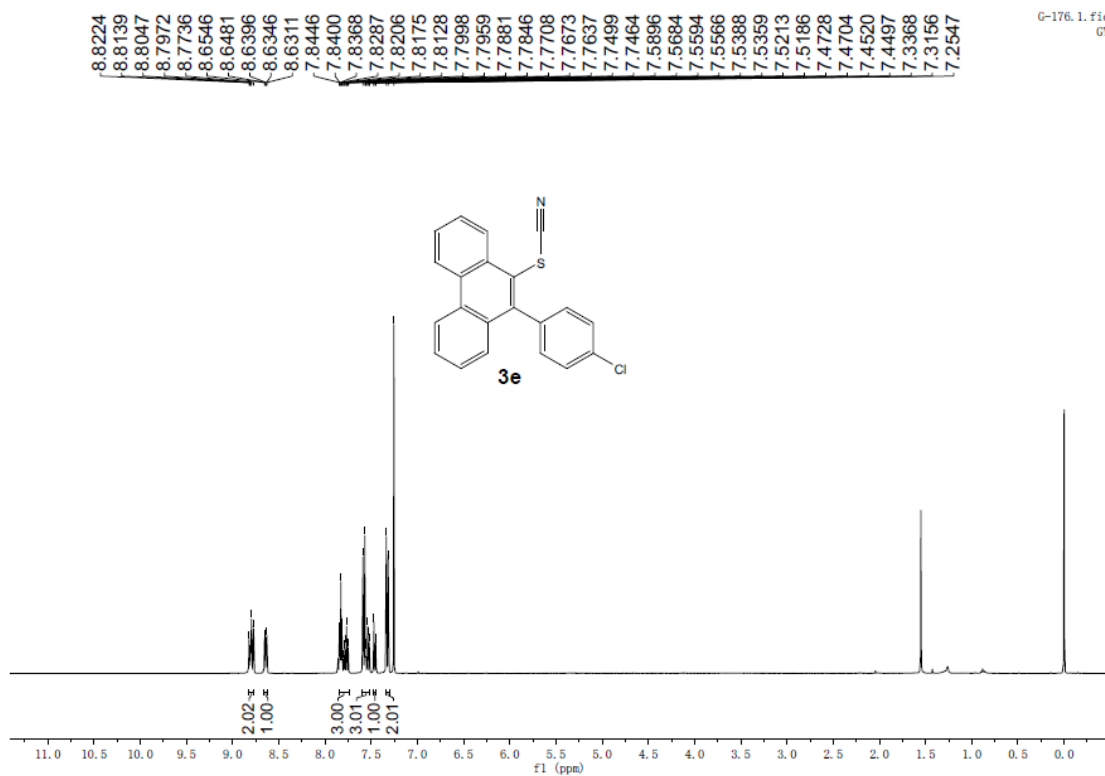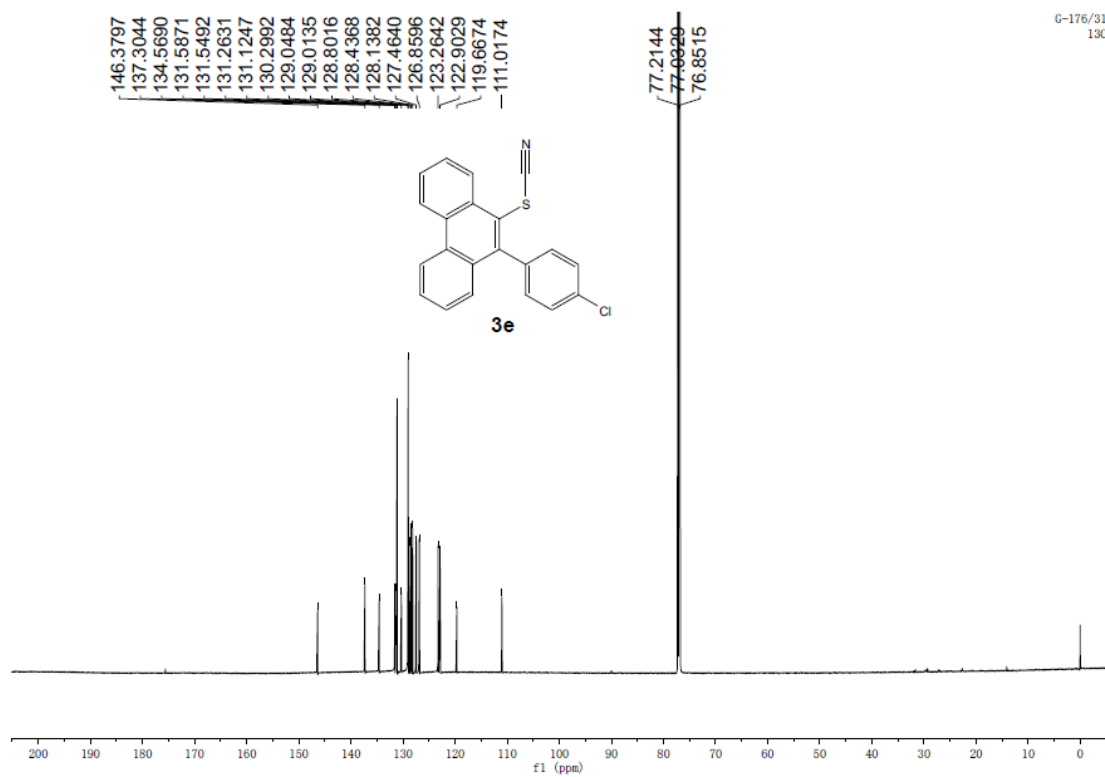

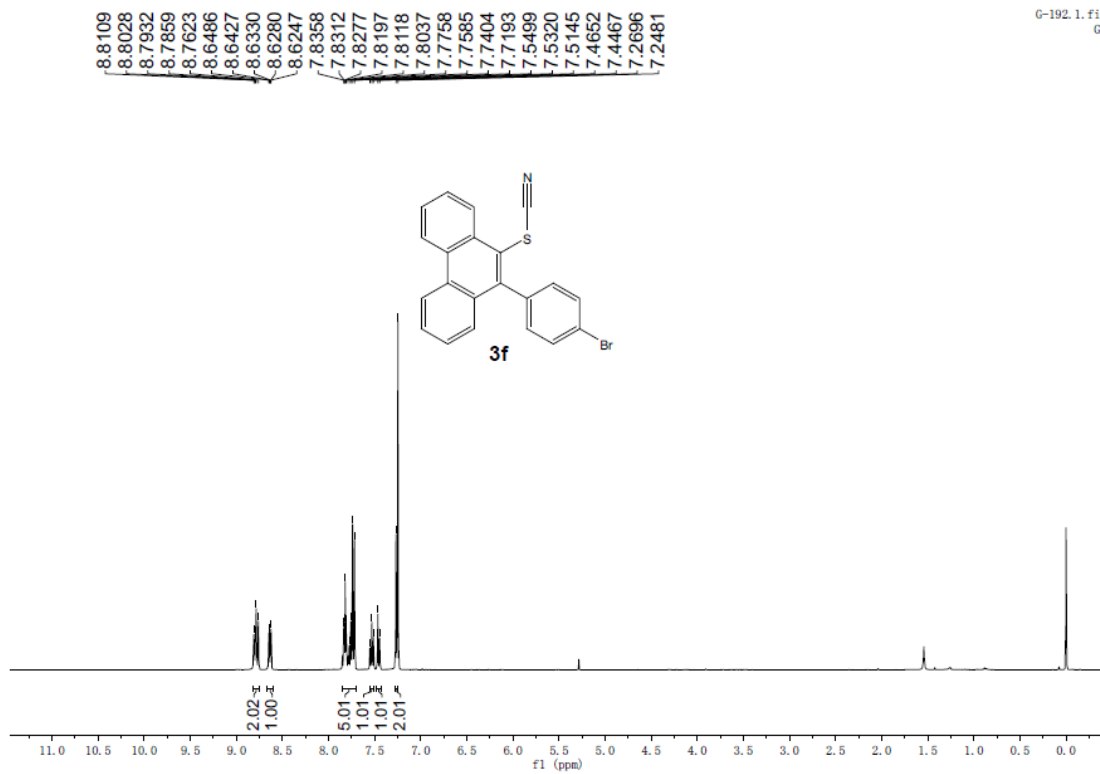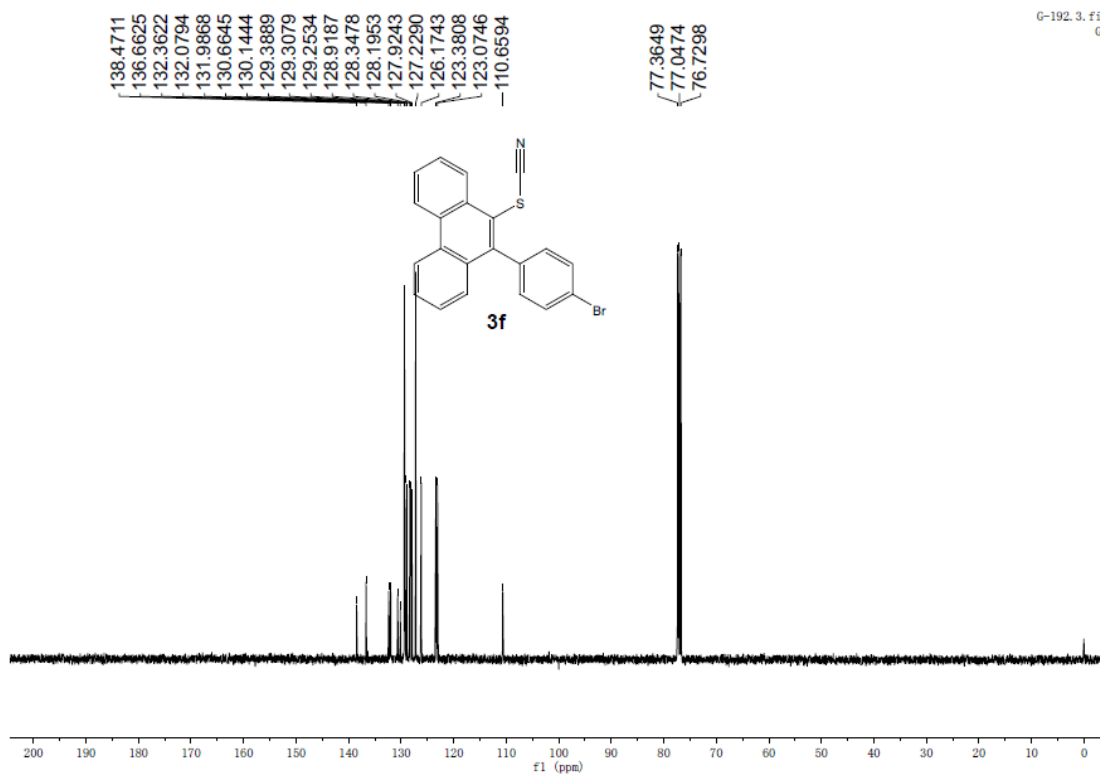

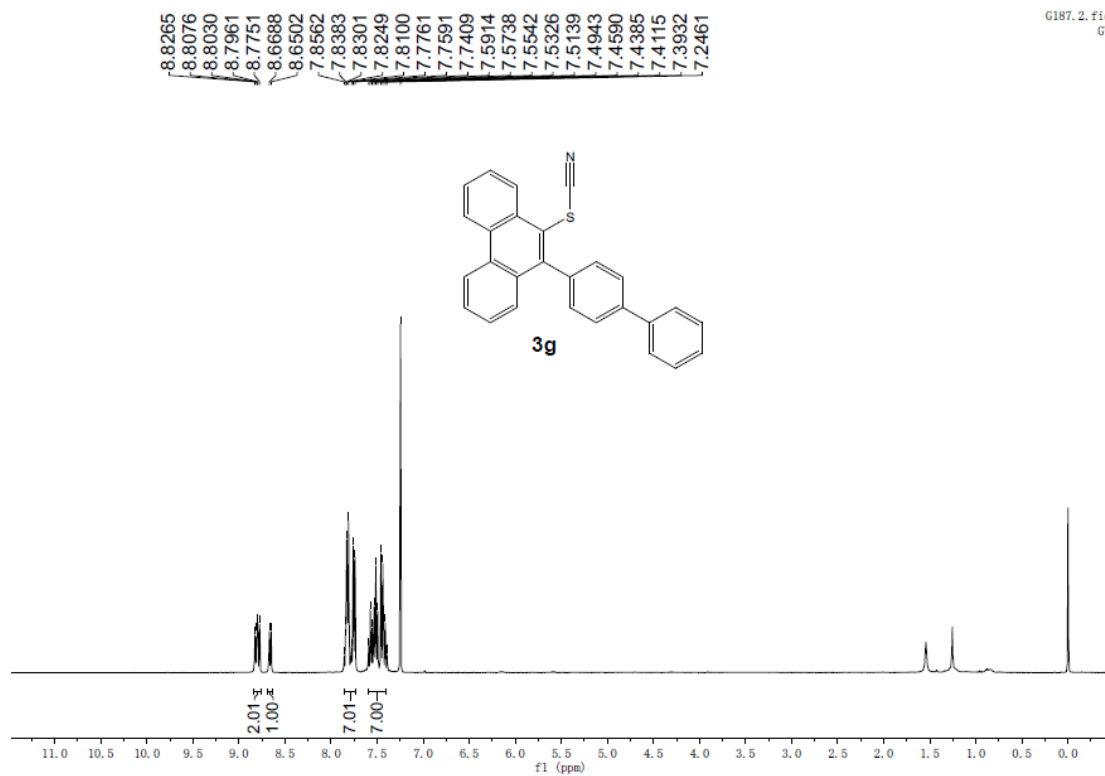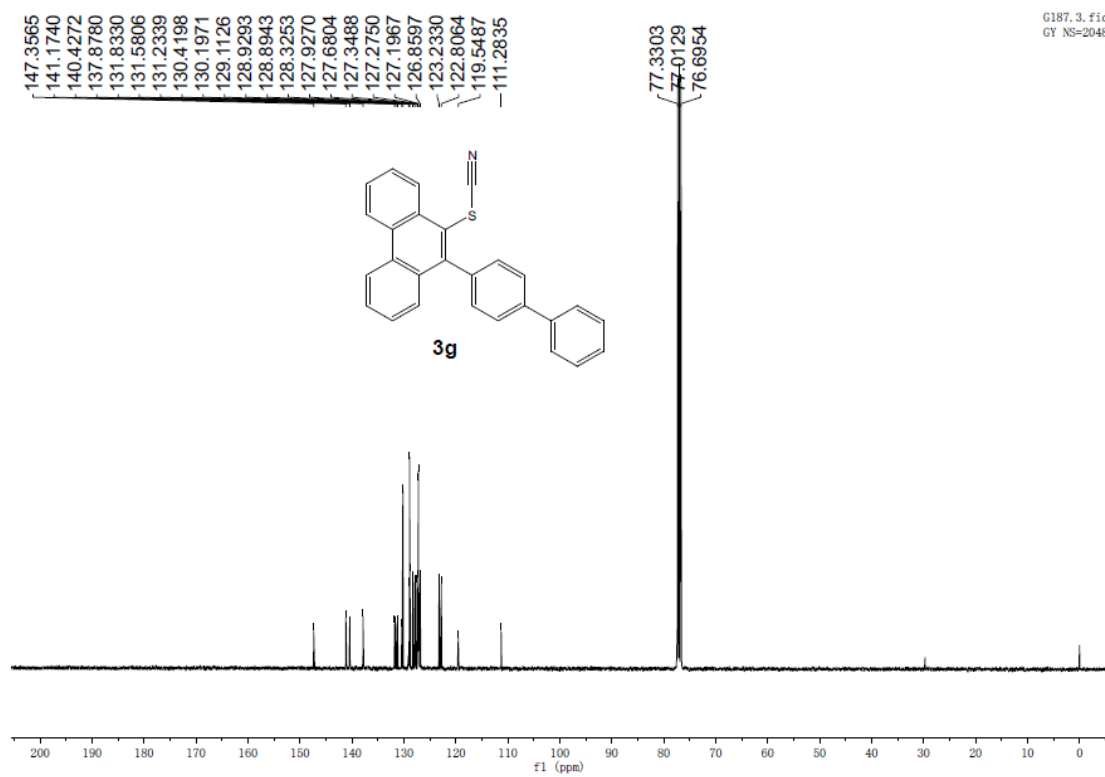



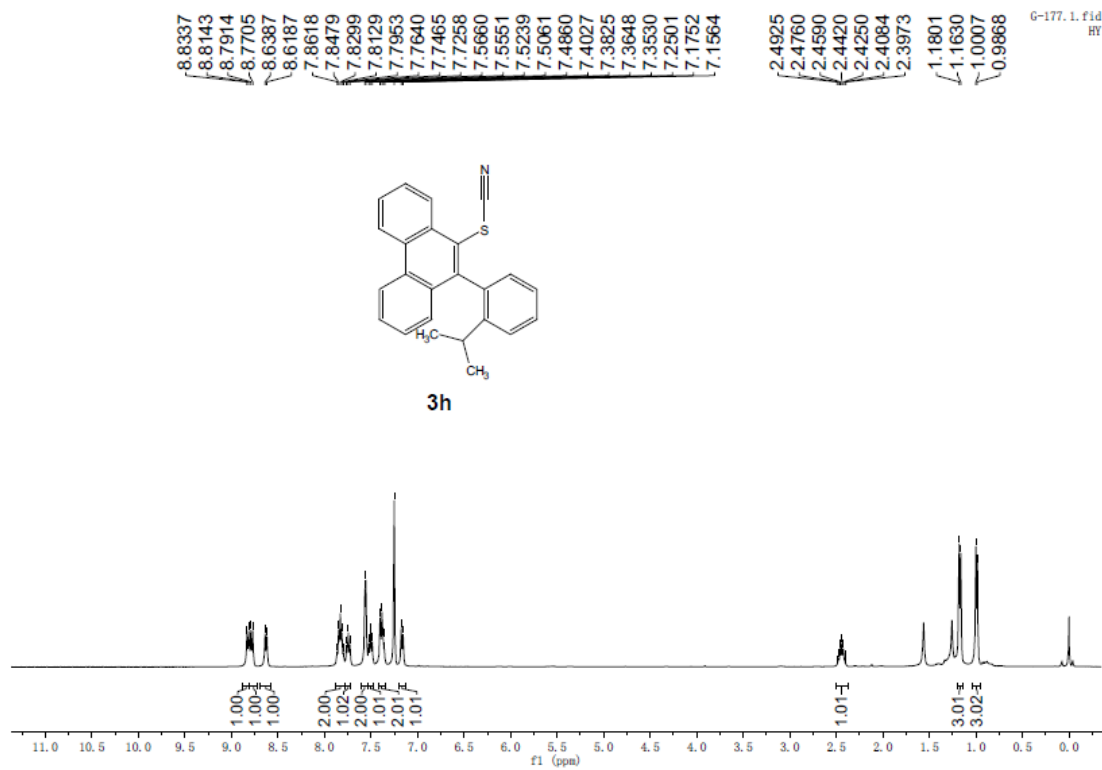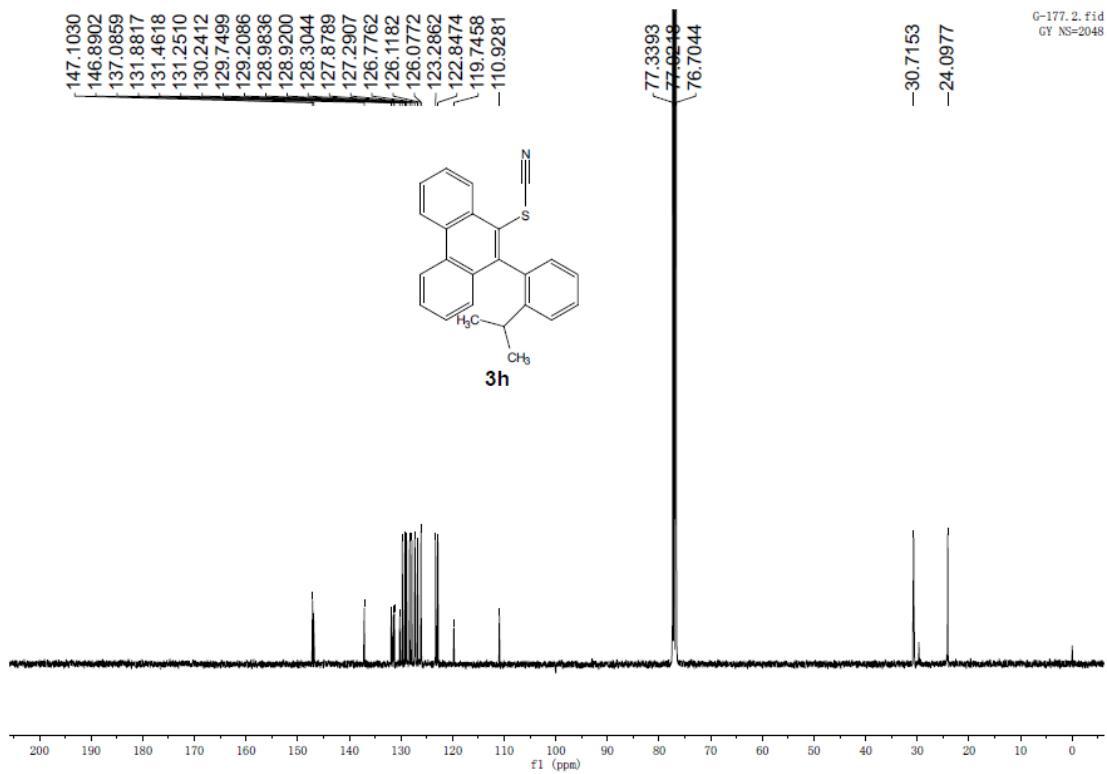

G-197.1.fid  
GY

8.8698  
8.8393  
8.8181  
8.6991  
8.6771  
7.8797  
7.8692  
7.8485  
7.8233  
7.8044  
7.7849  
7.6053  
7.5872  
7.5723  
7.5559  
7.4950  
7.4756  
7.4565  
7.4290  
7.4096  
7.4013  
7.3803  
7.2864

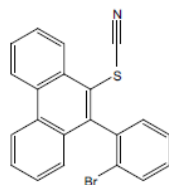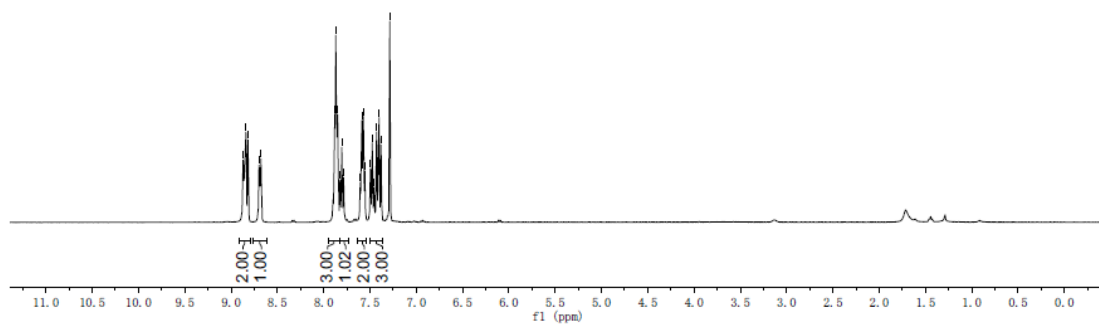

G-197.2.fid  
GY

146.1901  
139.6715  
132.9988  
131.6893  
131.4219  
130.8343  
130.2722  
130.1781  
129.0371  
128.3356  
128.1795  
127.8184  
127.6010  
126.8636  
124.1691  
123.3186  
122.9766  
119.8458  
110.5776

77.3302  
77.0137  
76.6952

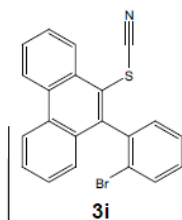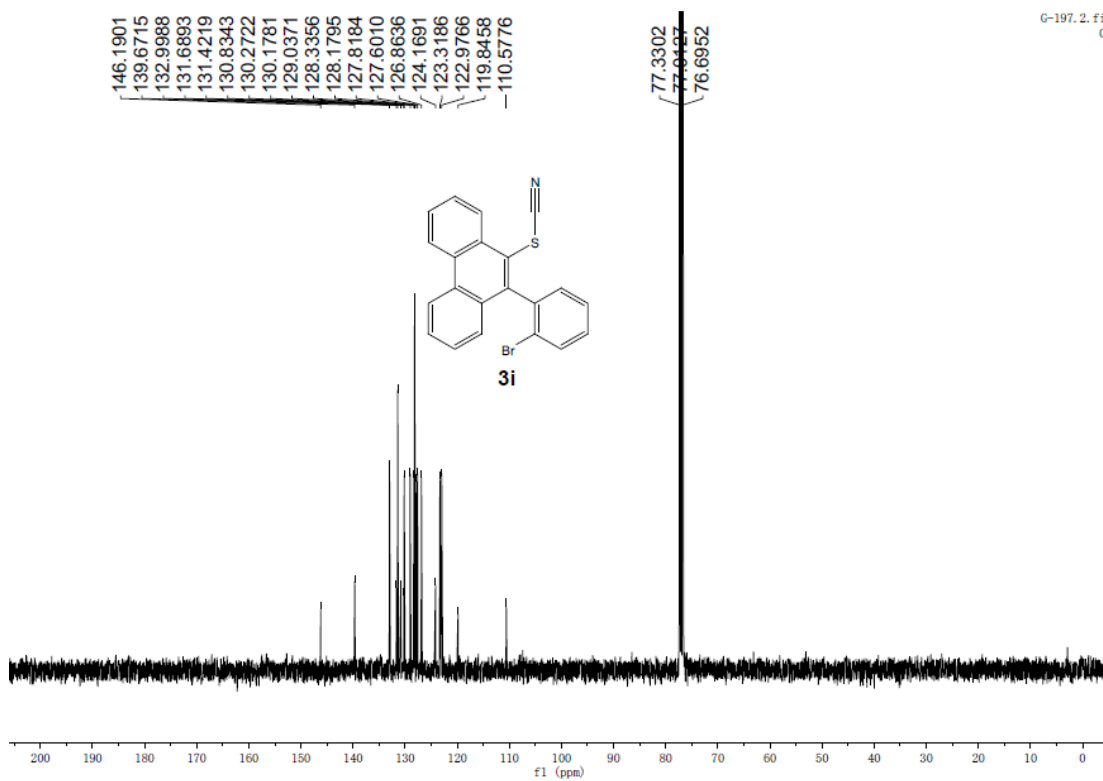

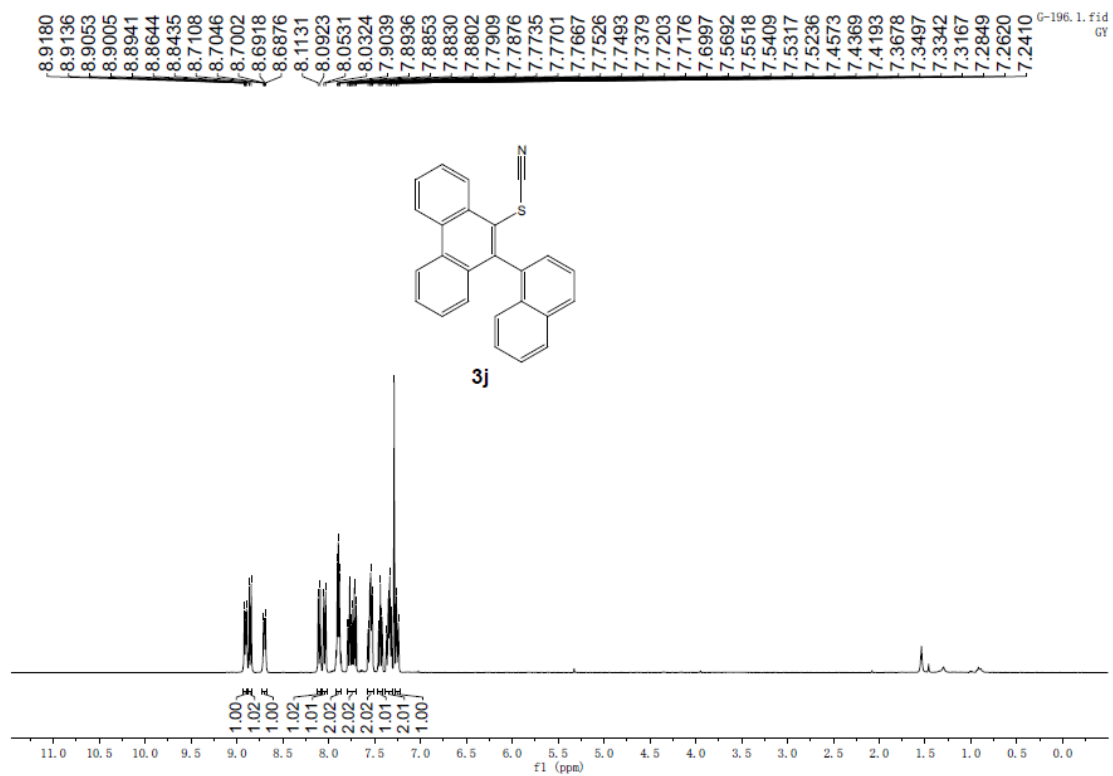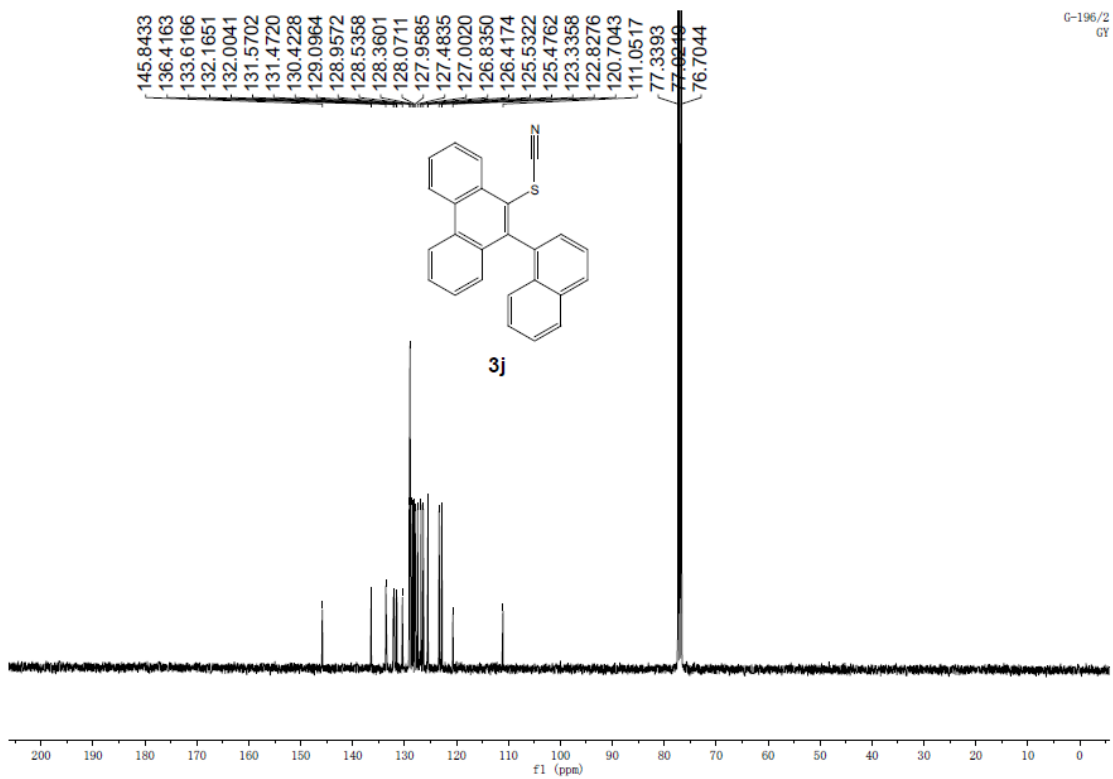

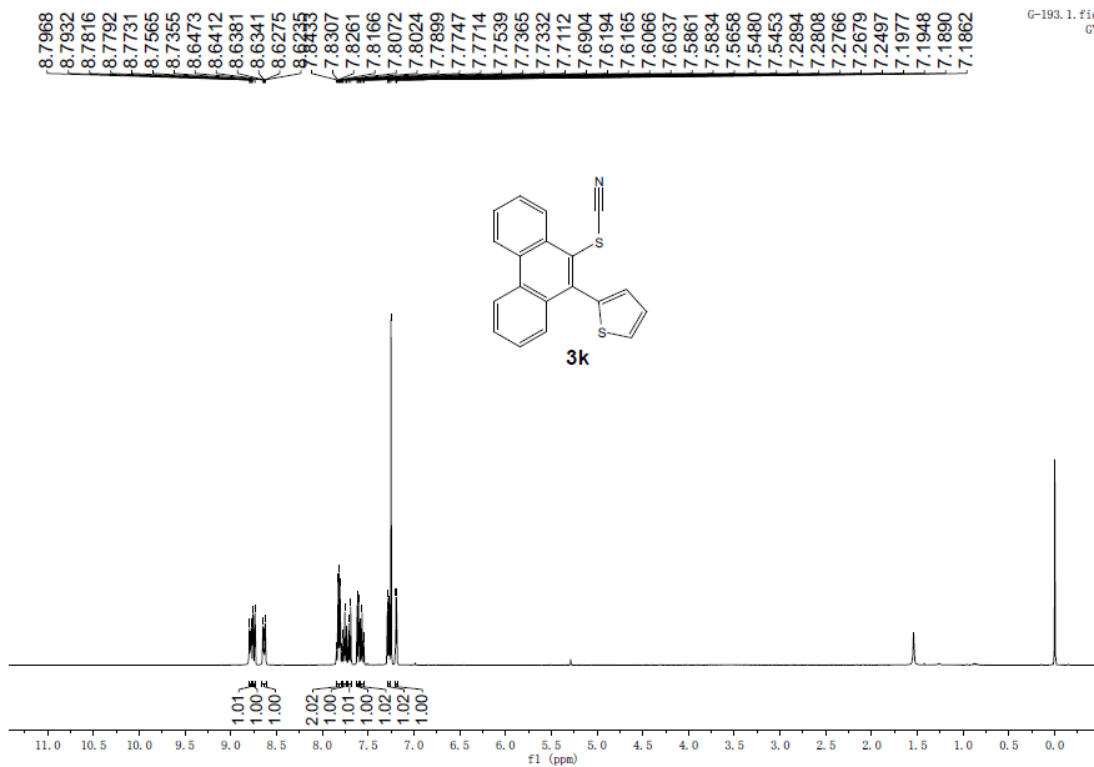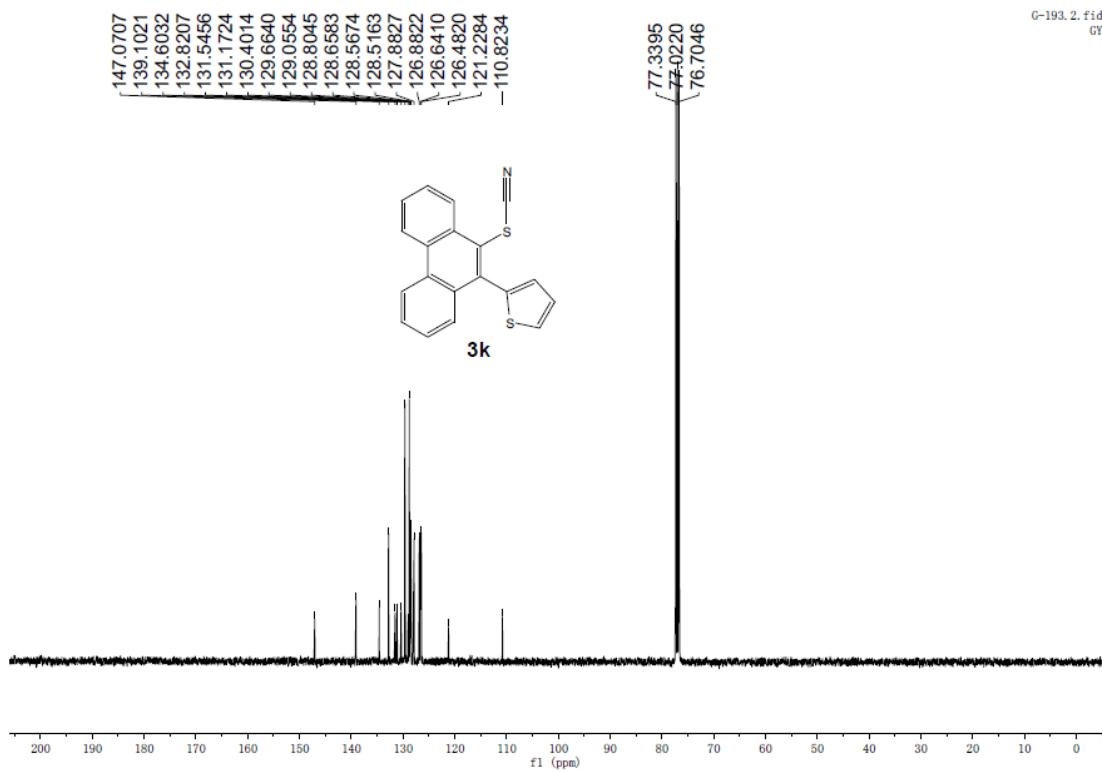

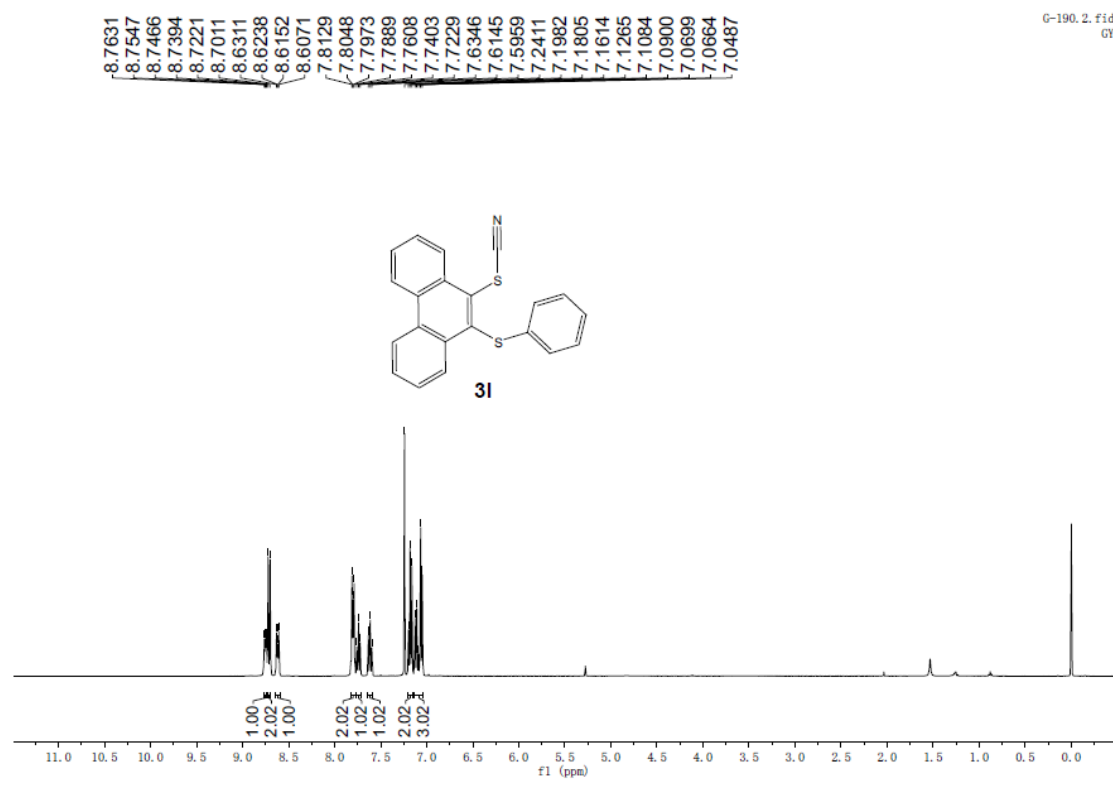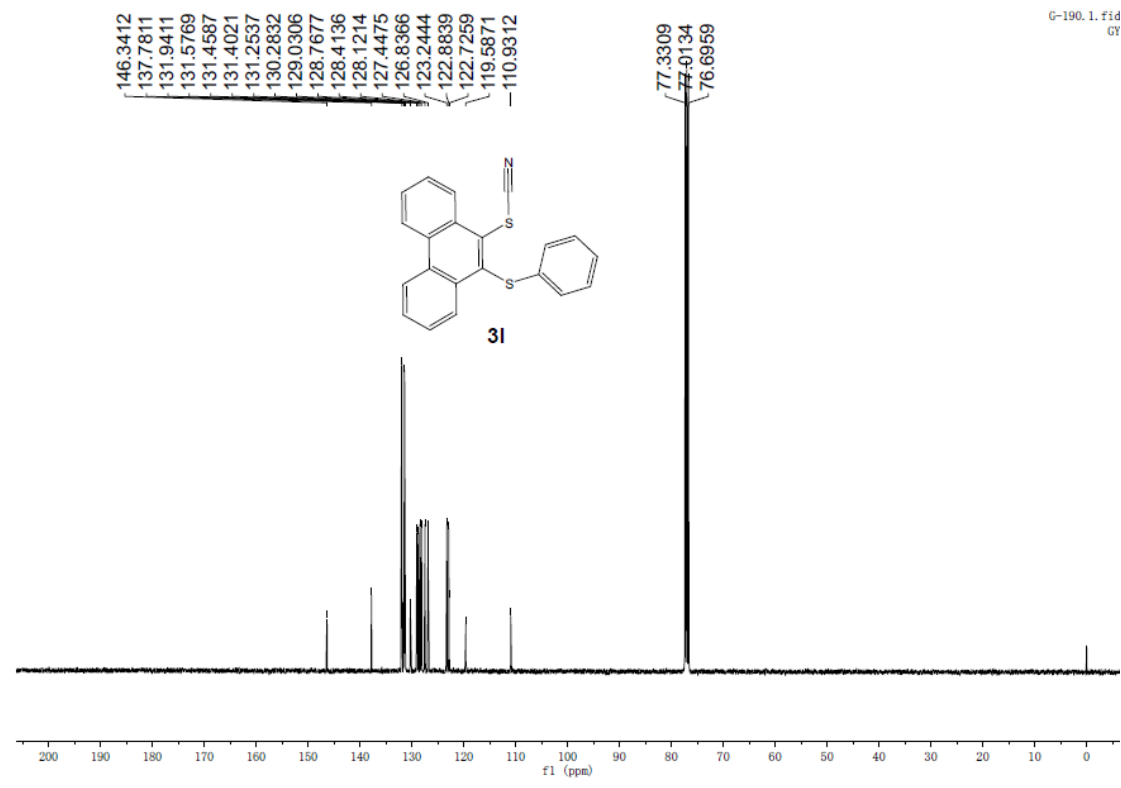

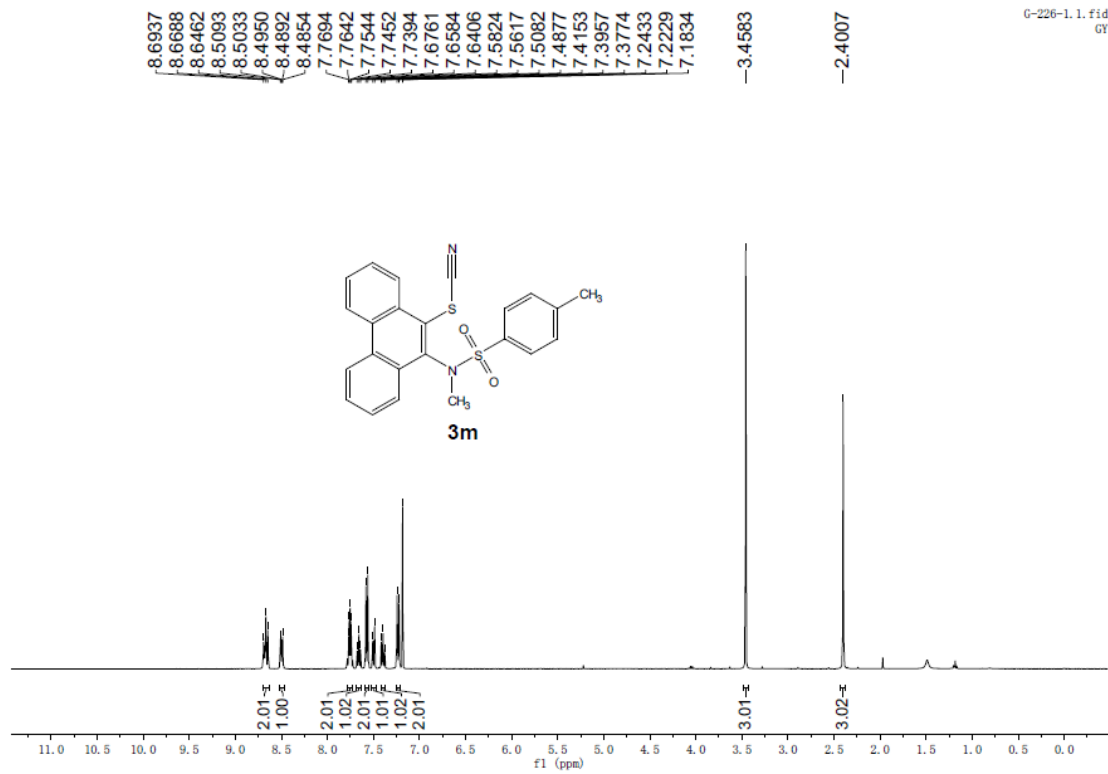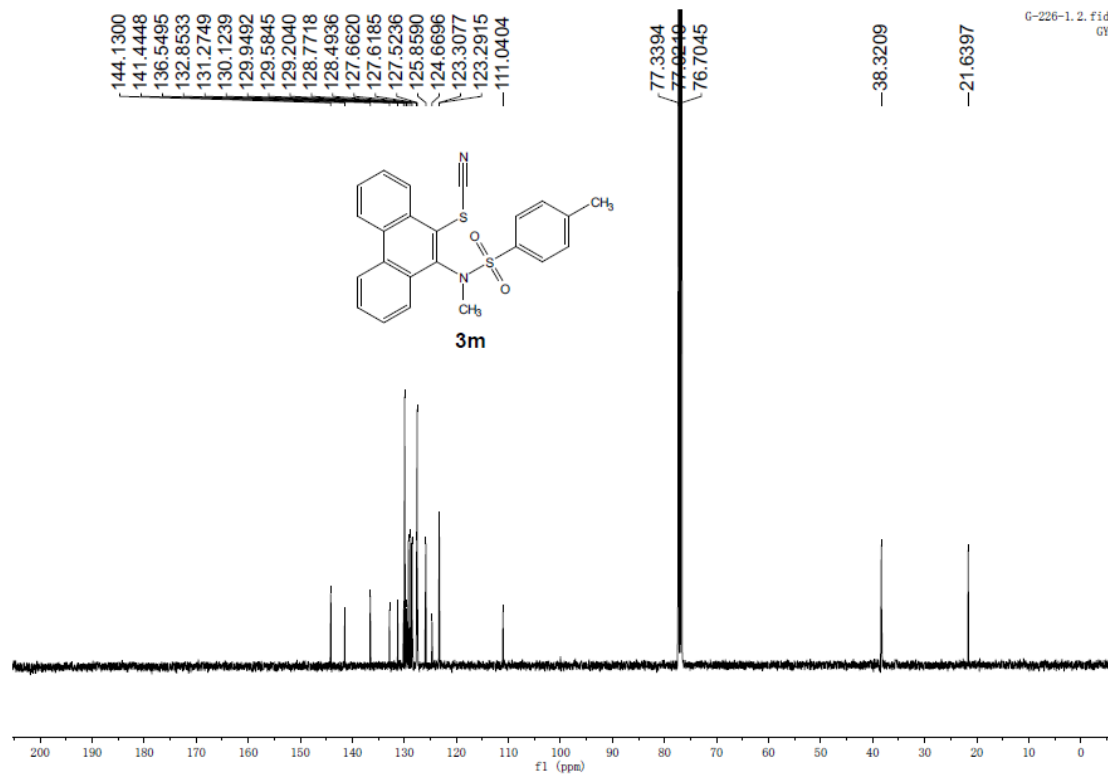

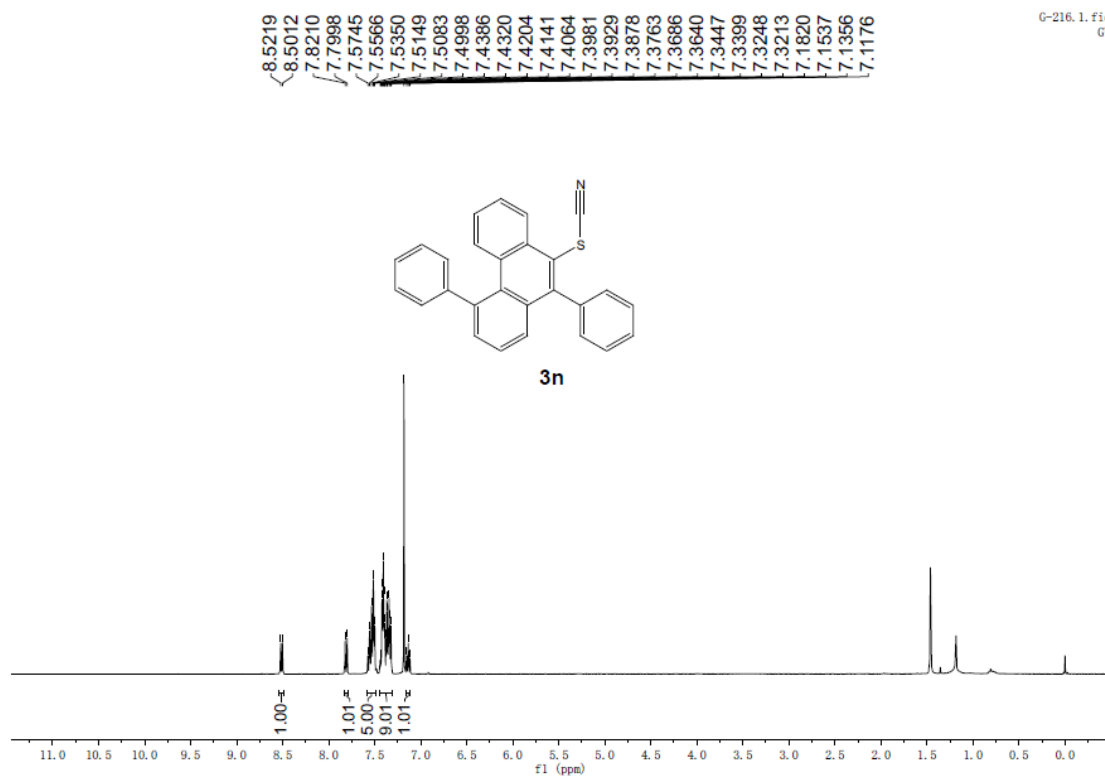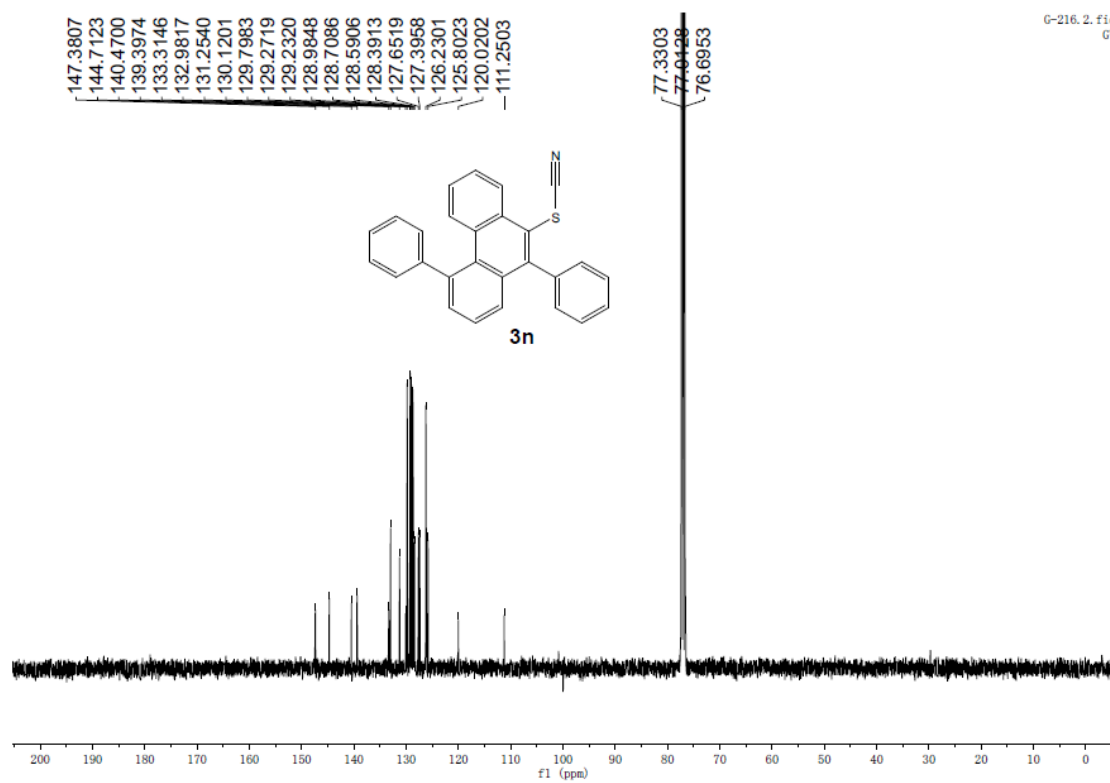

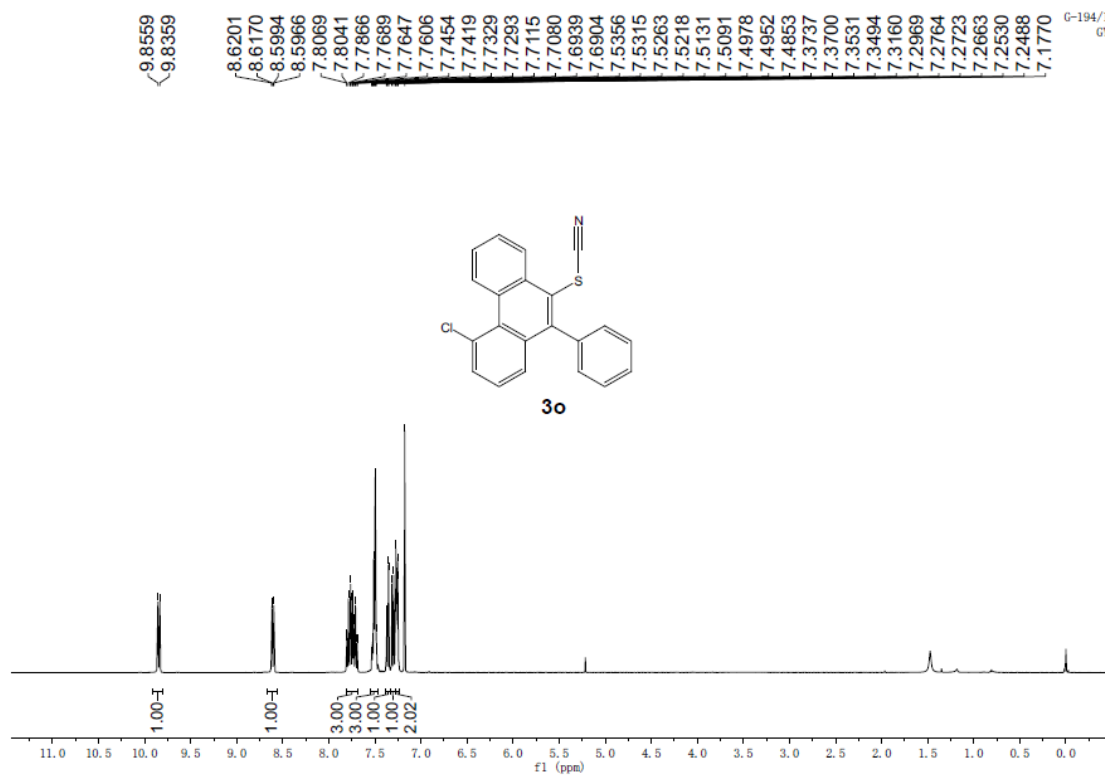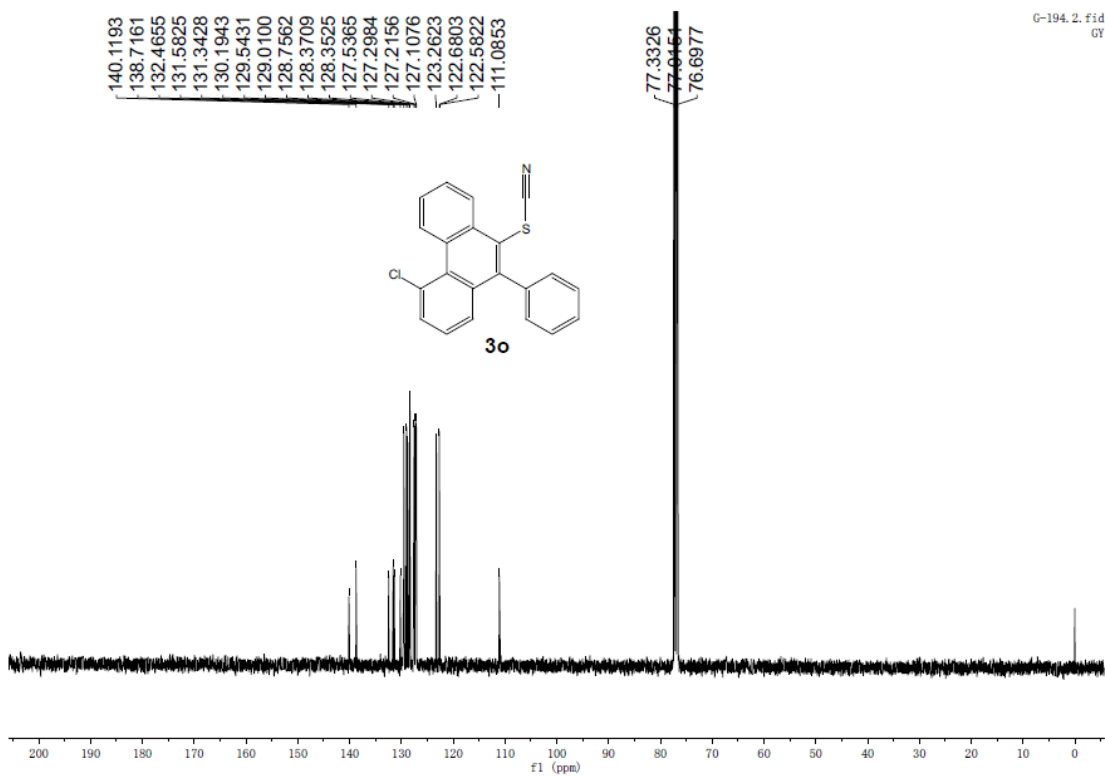



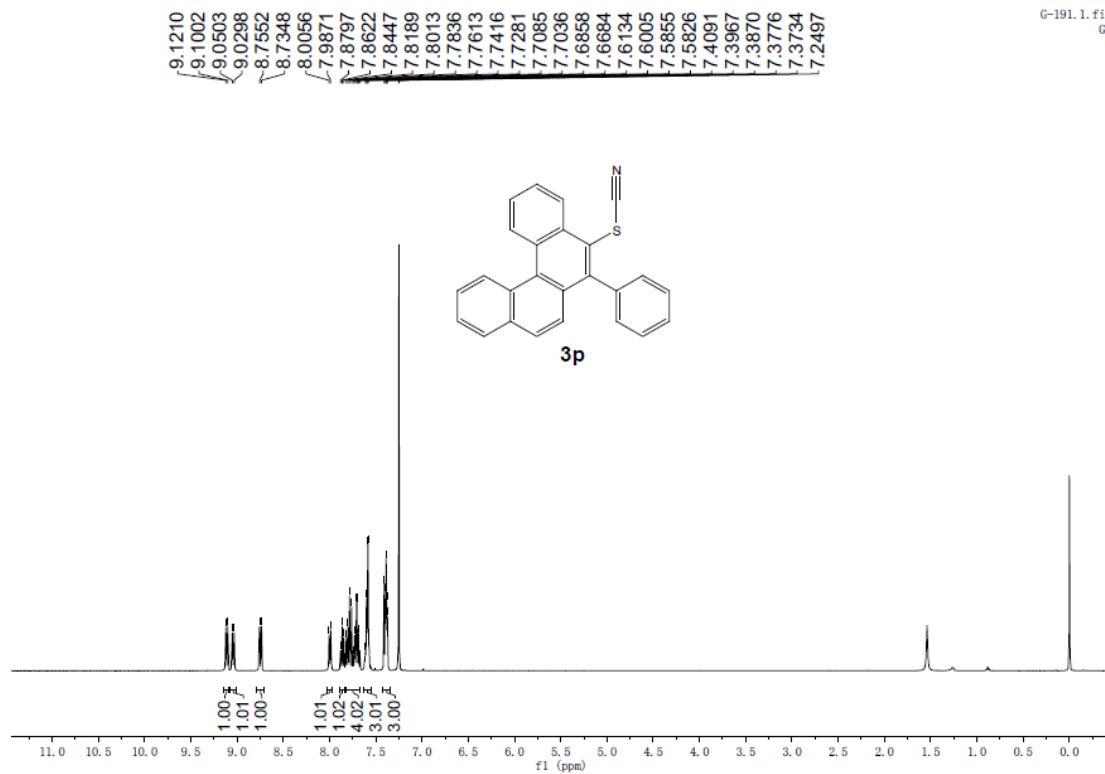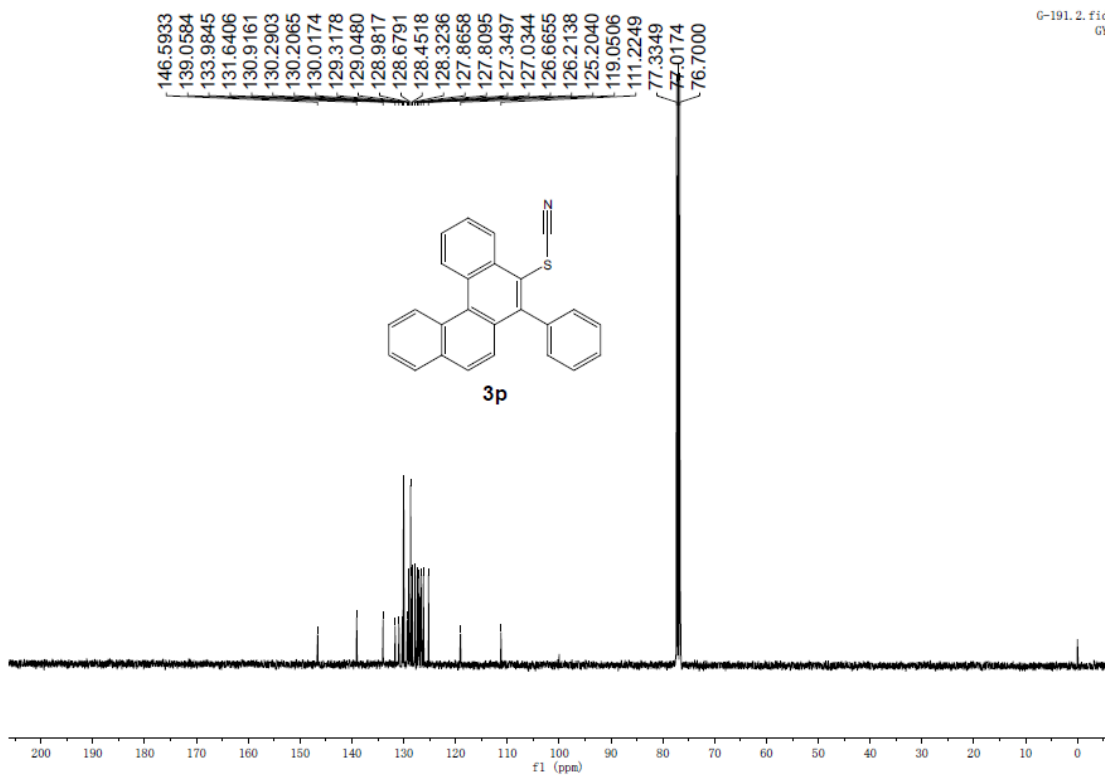

7.5793  
7.5759  
7.5733  
7.5619  
7.5569  
7.4683  
7.4639  
7.4516  
7.4489  
7.4459  
7.4392  
7.4260  
7.4194  
7.4160  
7.3415  
7.3317  
7.3096  
7.2974  
7.2927  
7.2845  
7.2799  
7.2632  
7.2592  
7.1636

G-188-3.1.fid  
GY

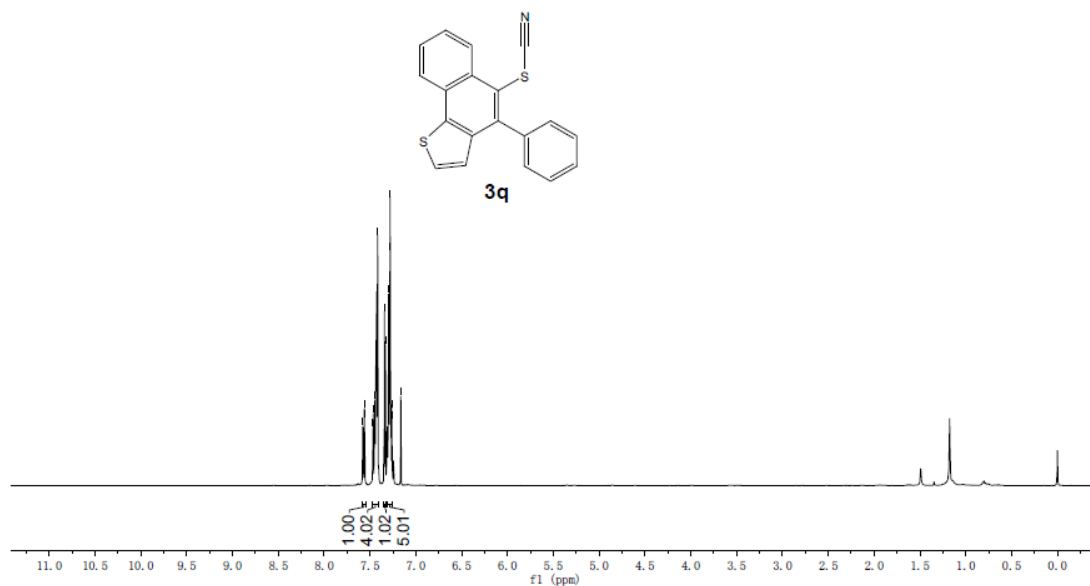

150.4504  
137.4720  
134.3483  
133.7899  
131.5024  
128.7893  
128.7704  
128.7504  
128.5512  
128.4370  
127.5765  
122.8761  
121.0386  
117.8664  
110.3735  
—94.8939  
—88.5805  
77.3791  
77.0615  
76.7440

G-188-3.2.fid  
GY

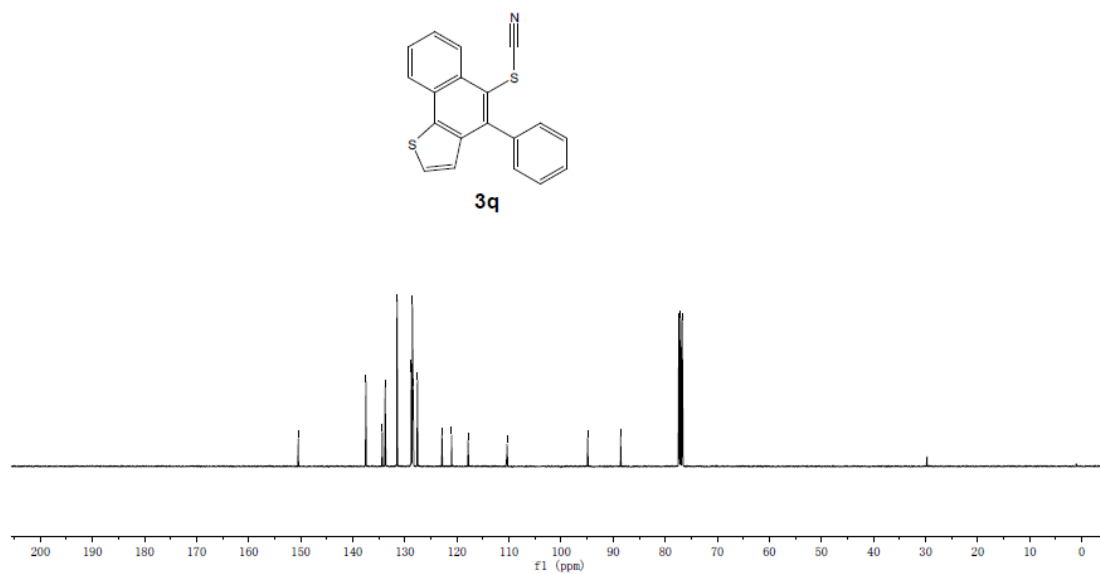

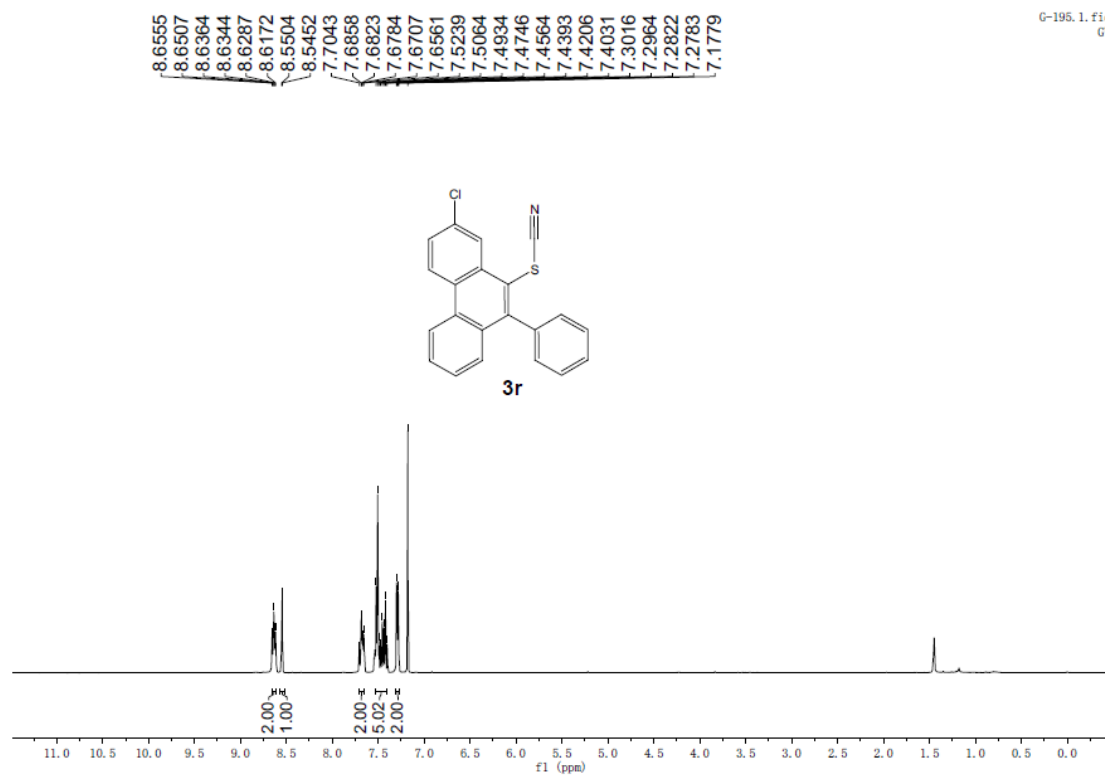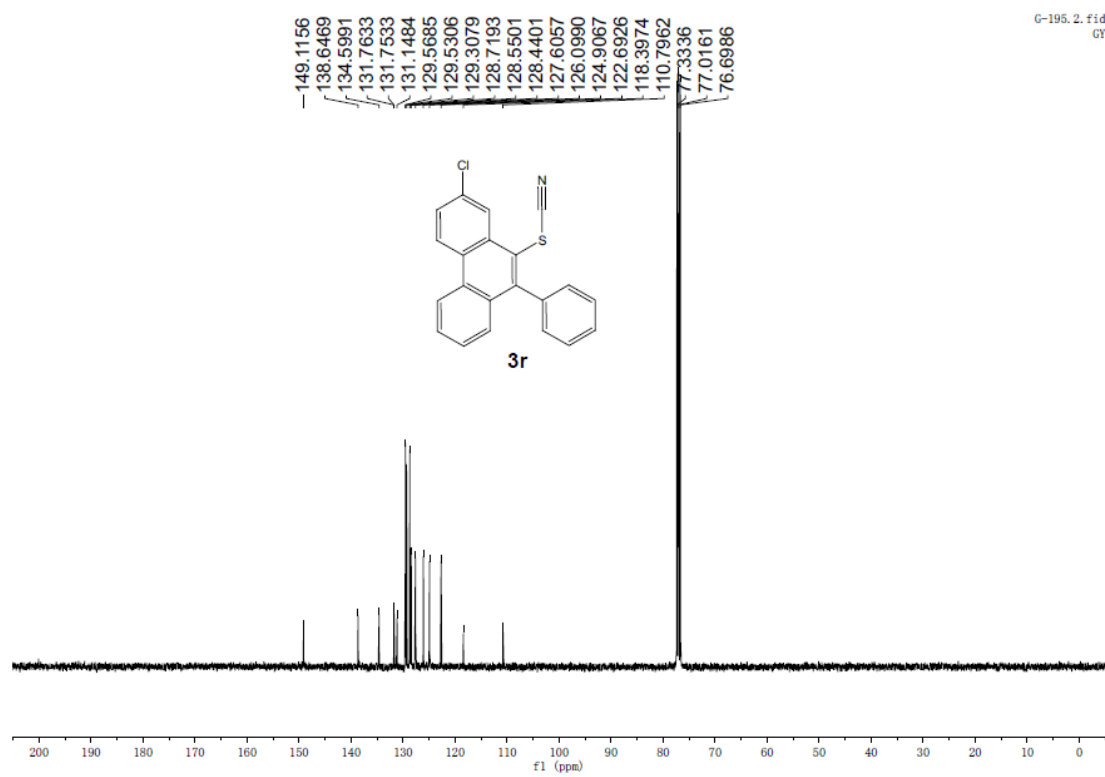

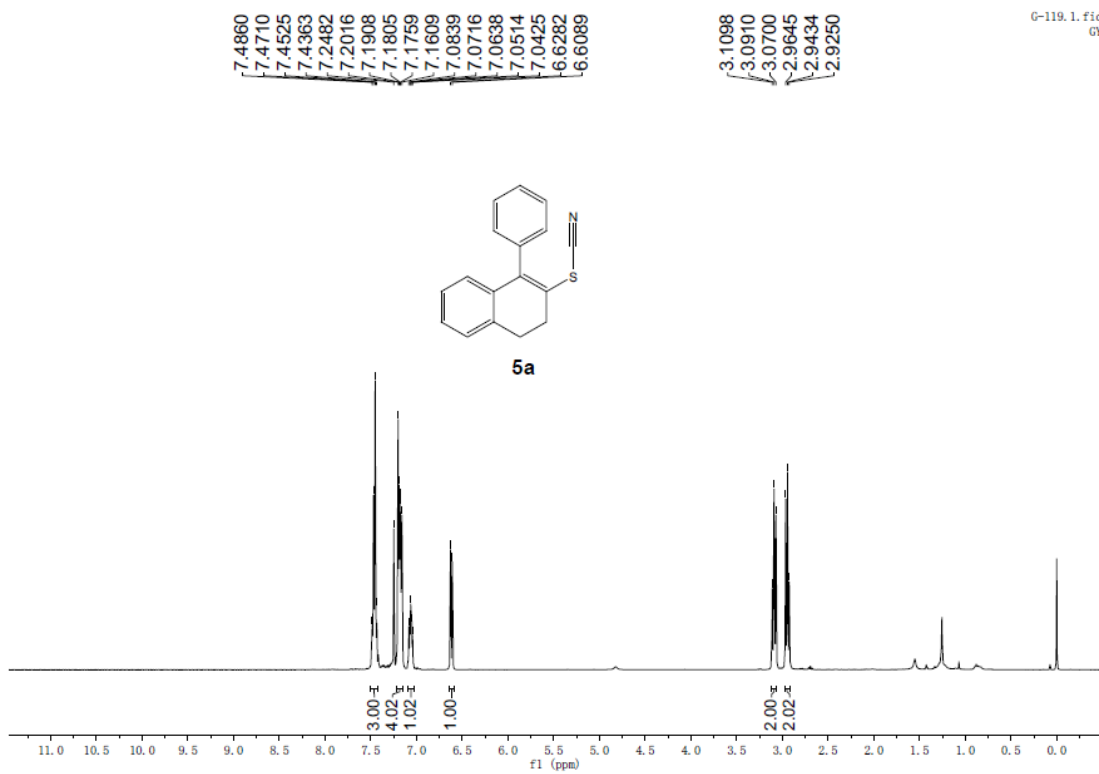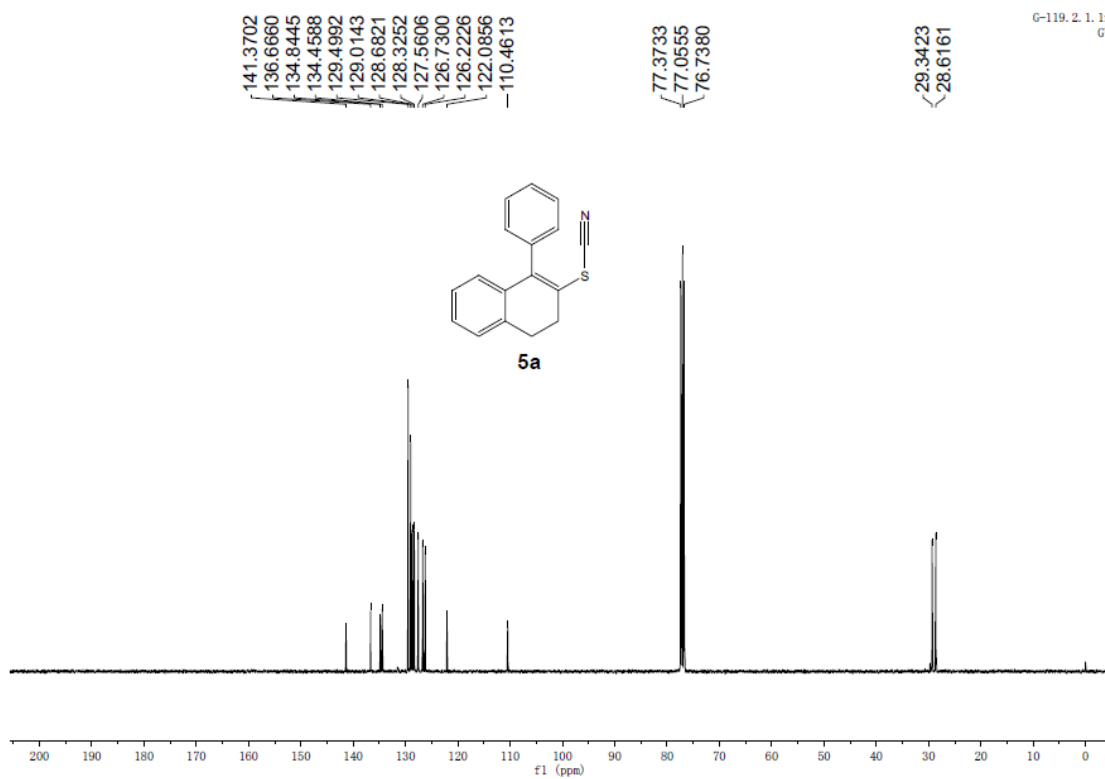

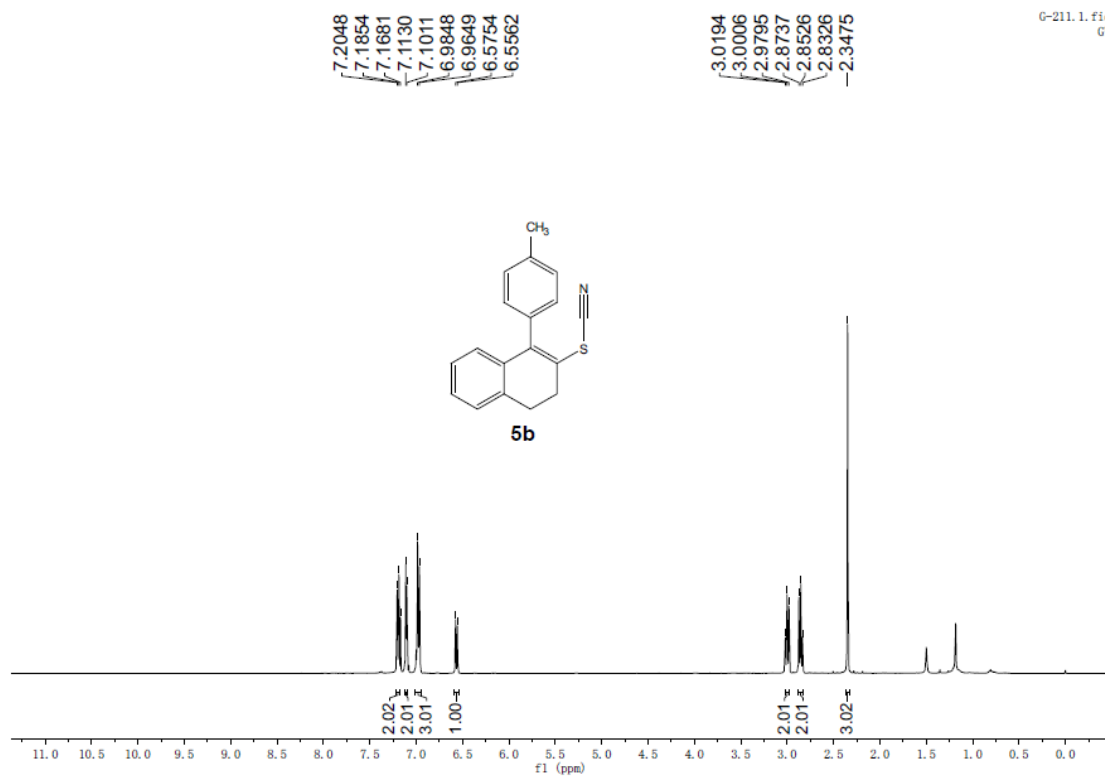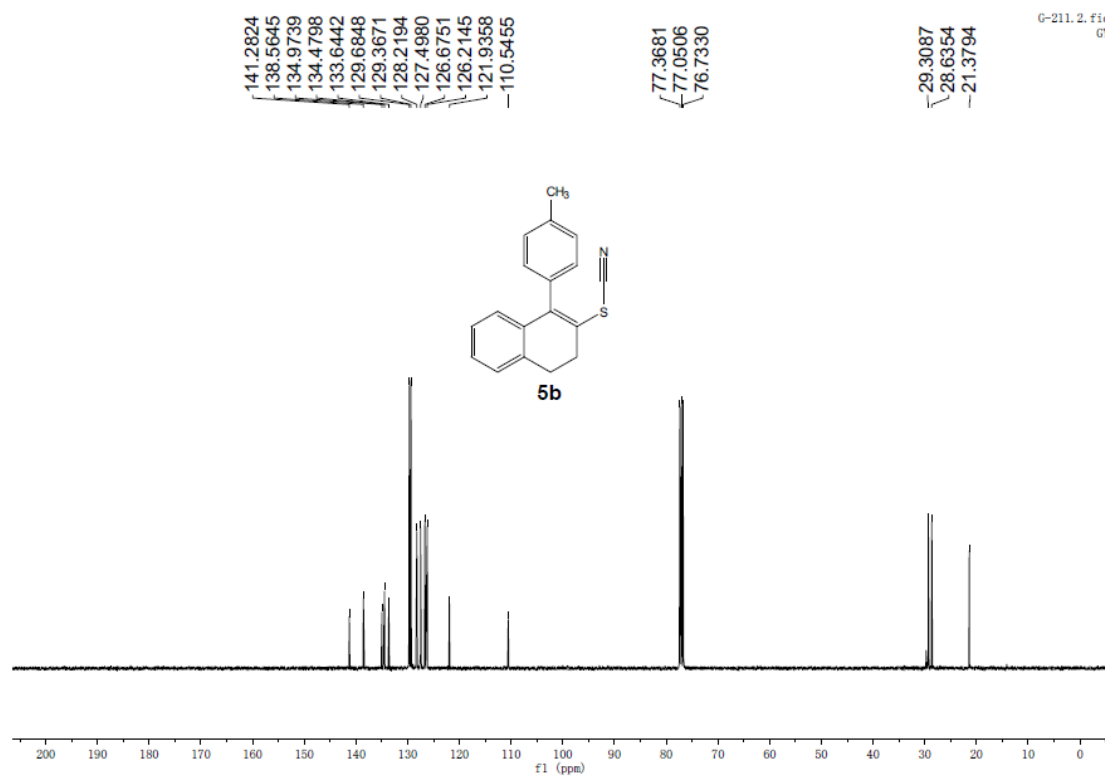

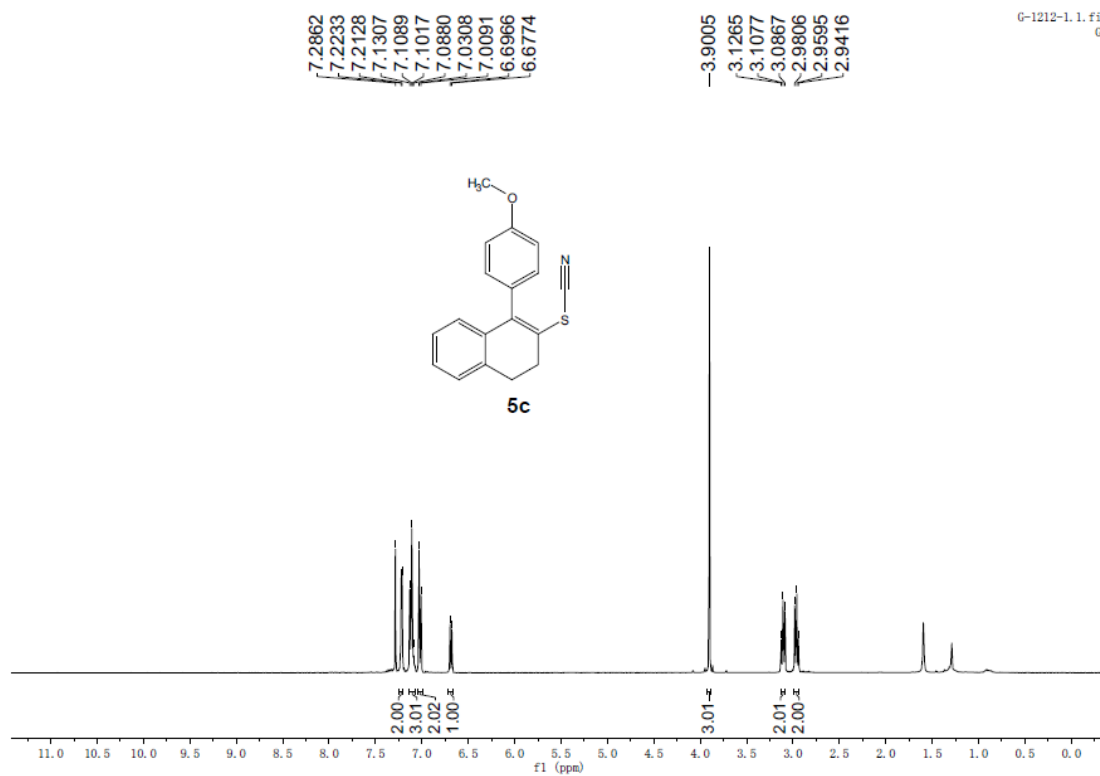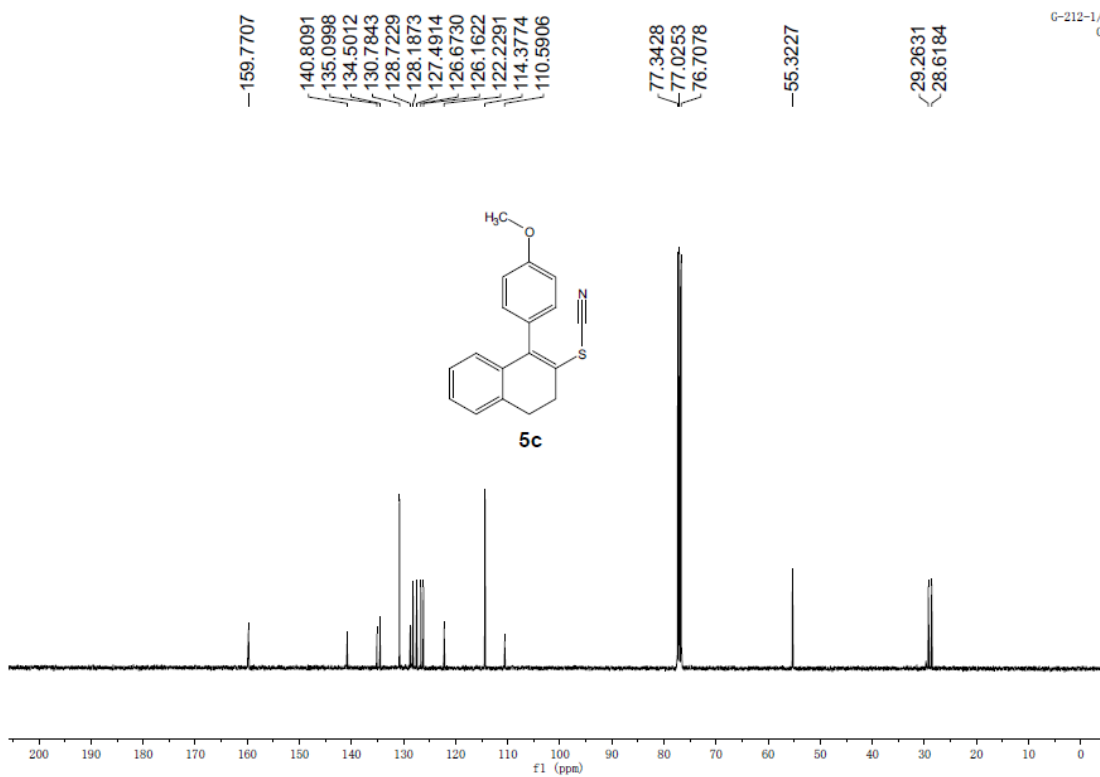

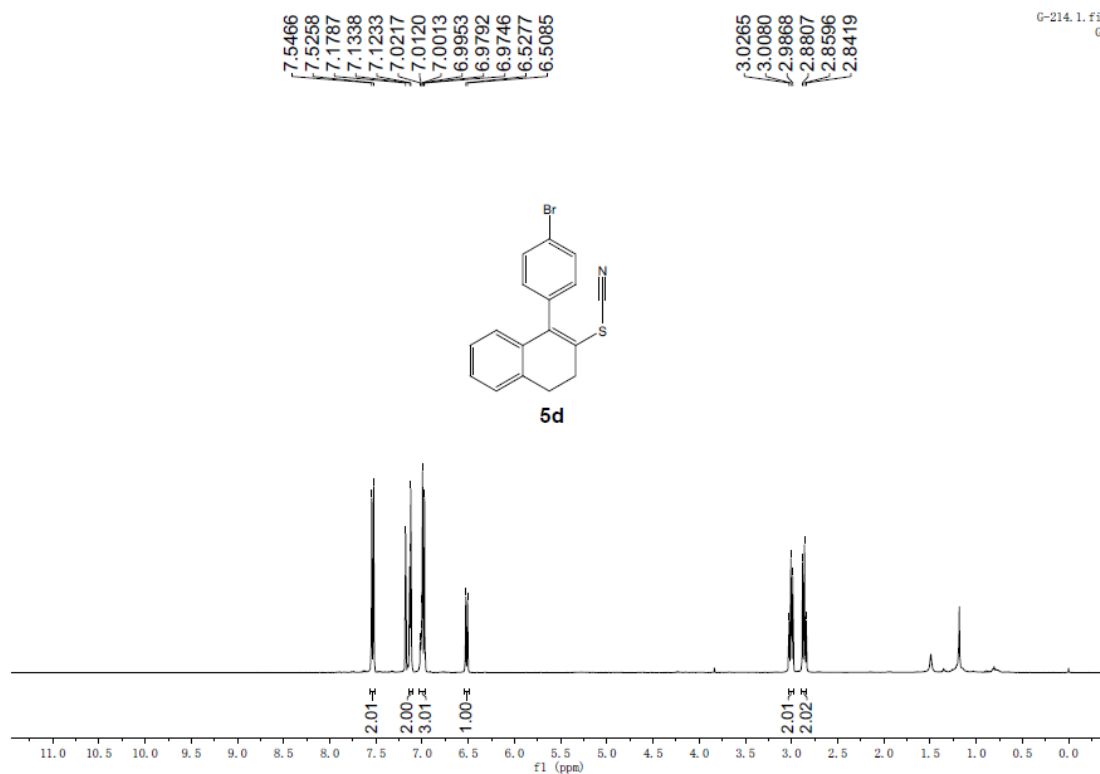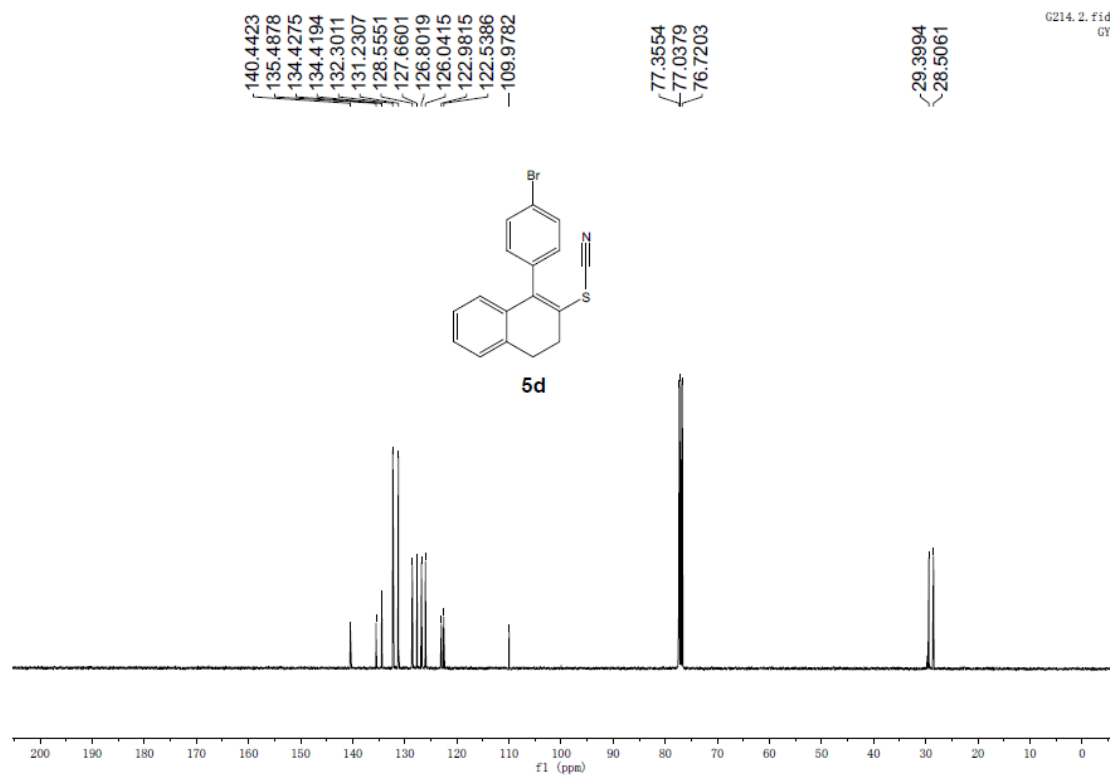

7.4777  
7.4580  
7.4427  
7.4233  
7.2533  
7.2127  
7.2019  
7.1647  
7.1435  
7.1223  
7.1035  
7.0930  
7.0833  
7.0735  
7.0622  
6.9761  
6.9571  
6.9180  
6.8951  
6.6181  
6.5988

3.1068  
3.0879  
3.0672  
2.9633  
2.9424  
2.9234

G-202-2.1.fid  
HRR

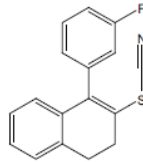

5e

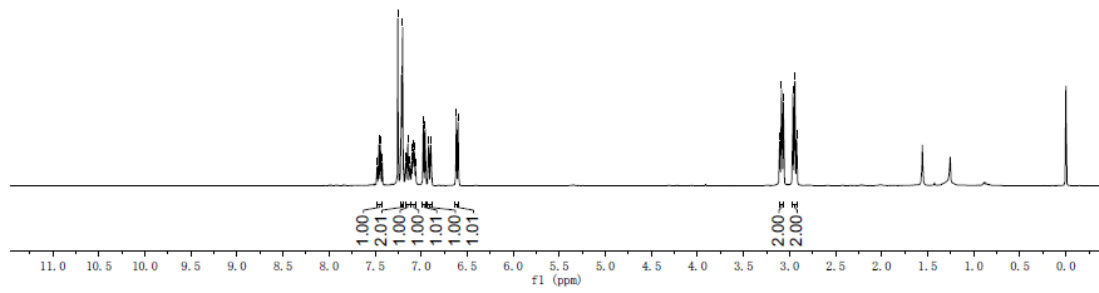

164.2297  
161.7613  
140.3140  
140.2952  
138.7138  
138.6370  
134.3705  
134.3309  
130.7529  
130.6690  
128.5428  
127.6427  
126.8035  
126.0087  
125.3341  
125.3040  
122.5895  
116.7127  
116.4974  
115.8601  
115.6519  
109.9775  
77.3304  
77.0129  
76.6955

29.3667  
28.4922

G-202.2.fid  
GY

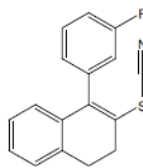

5e

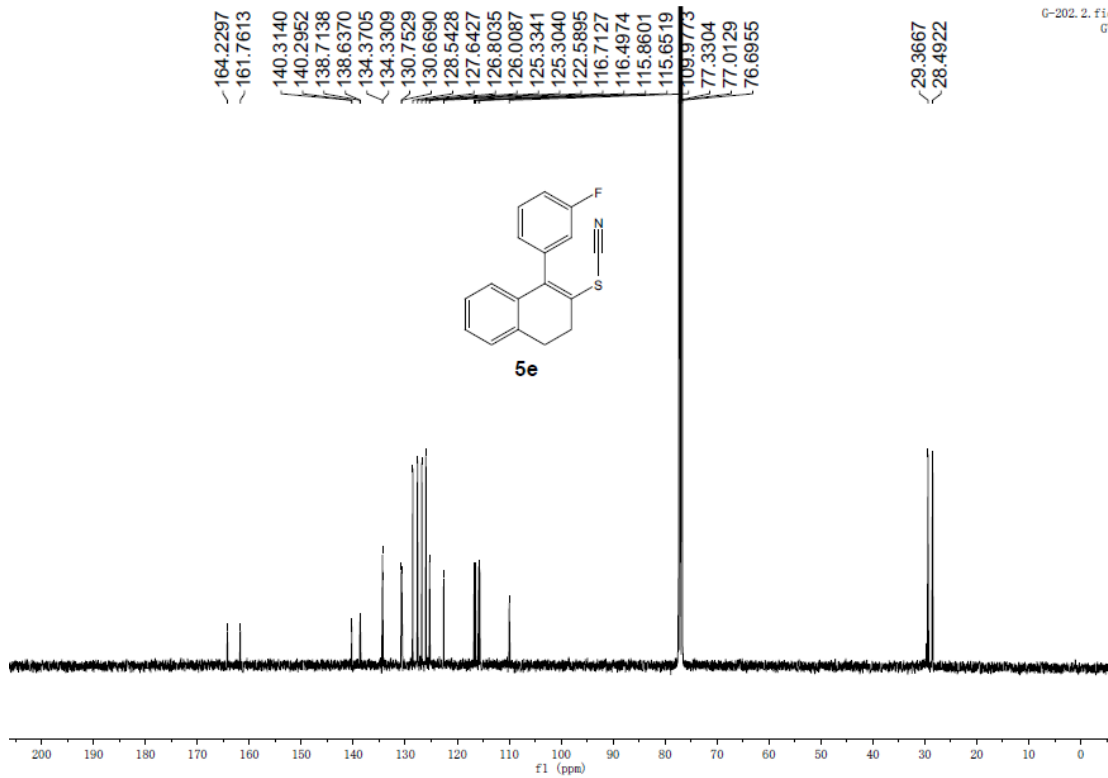



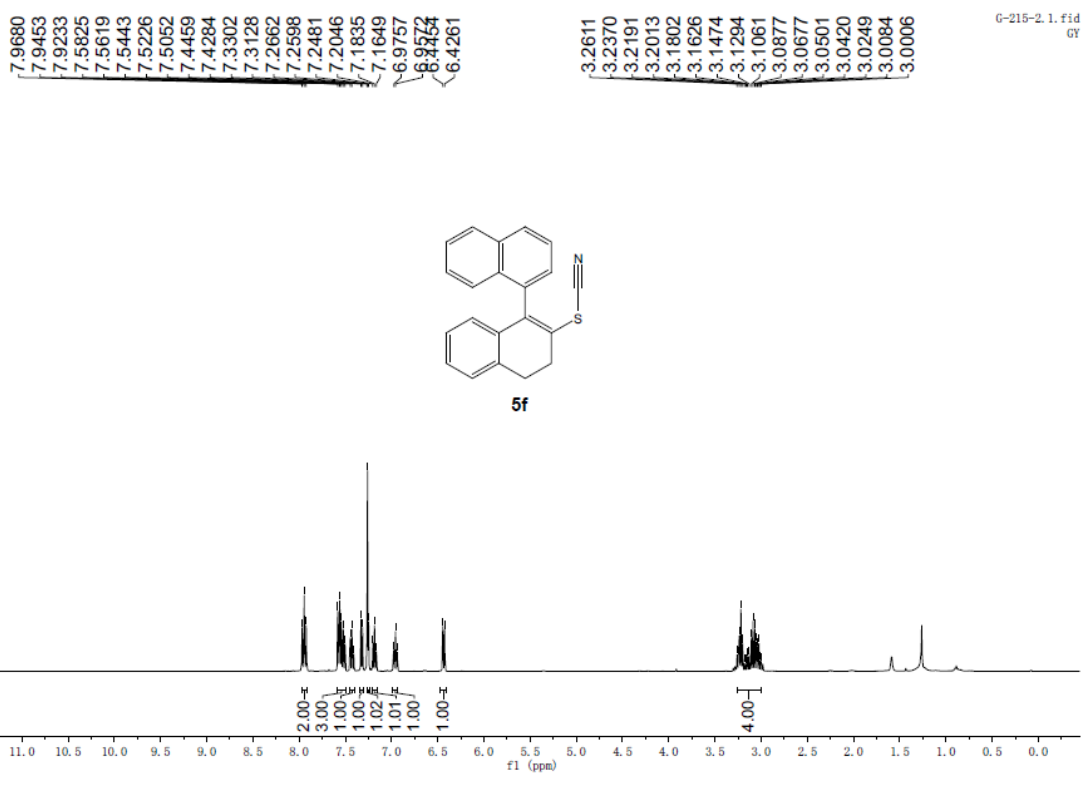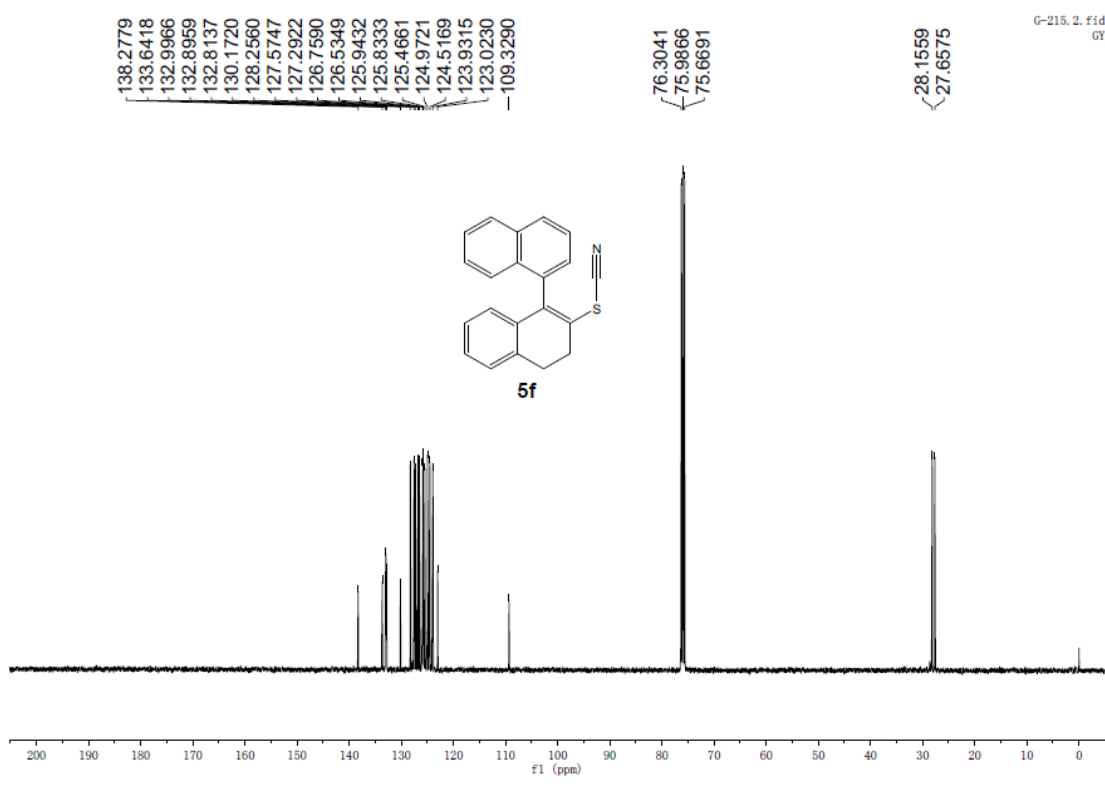

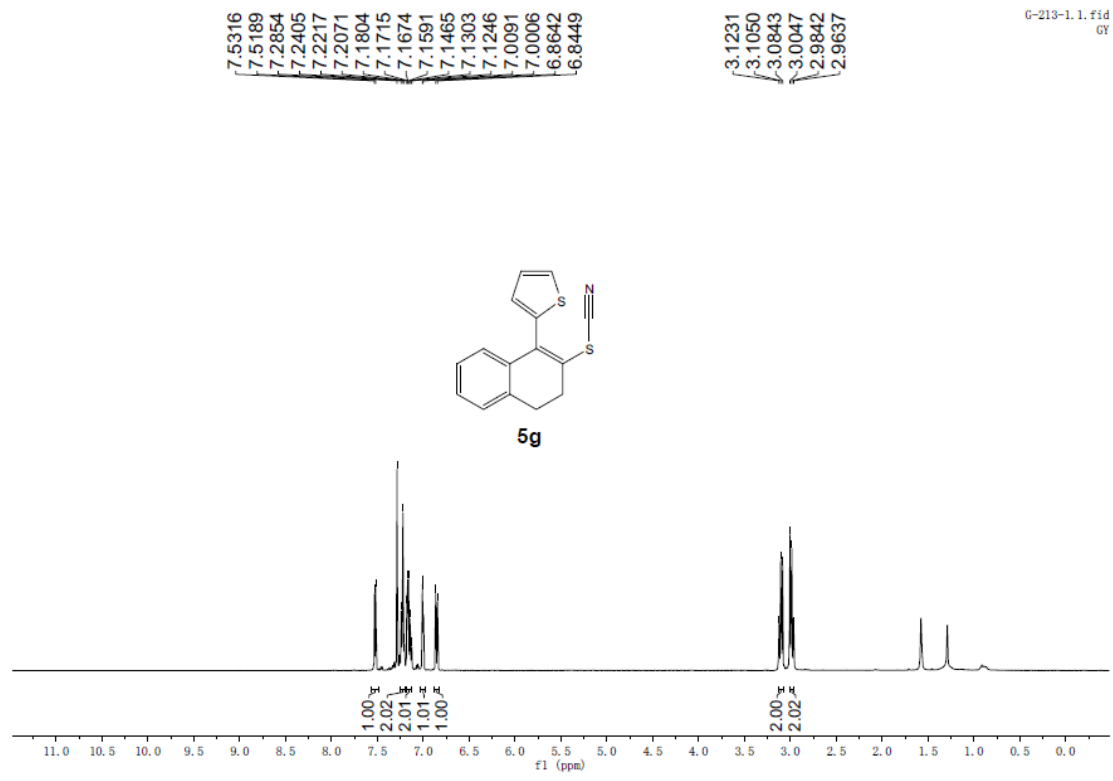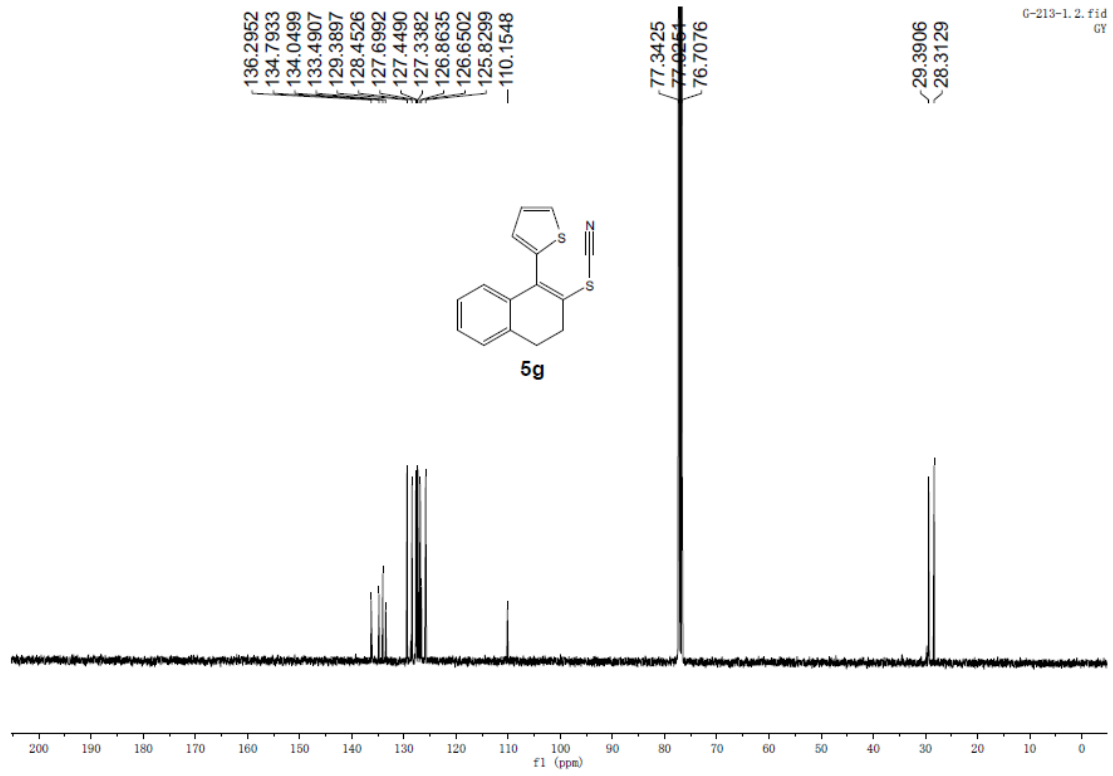

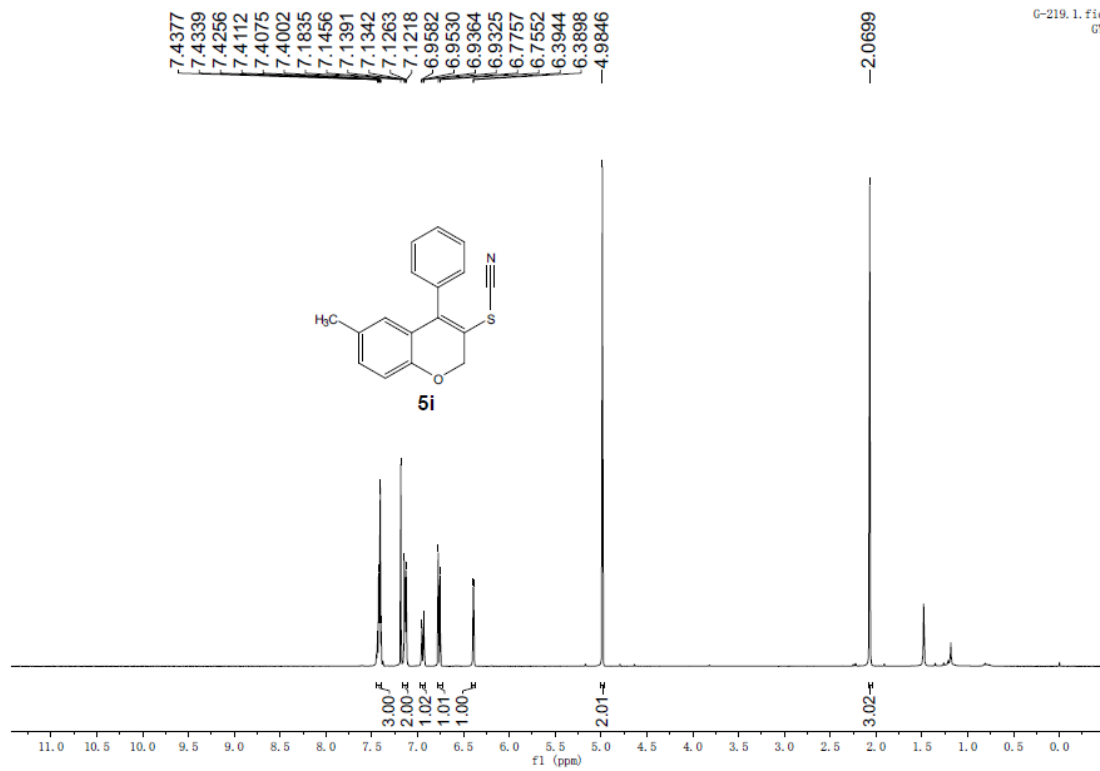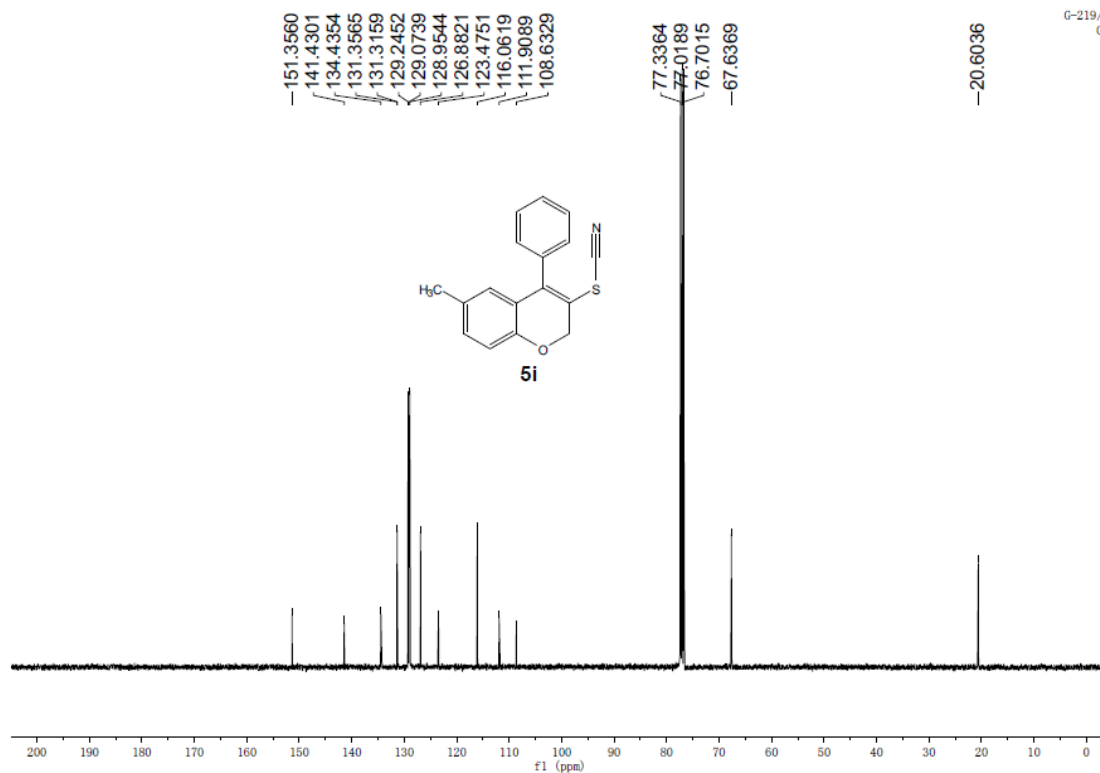

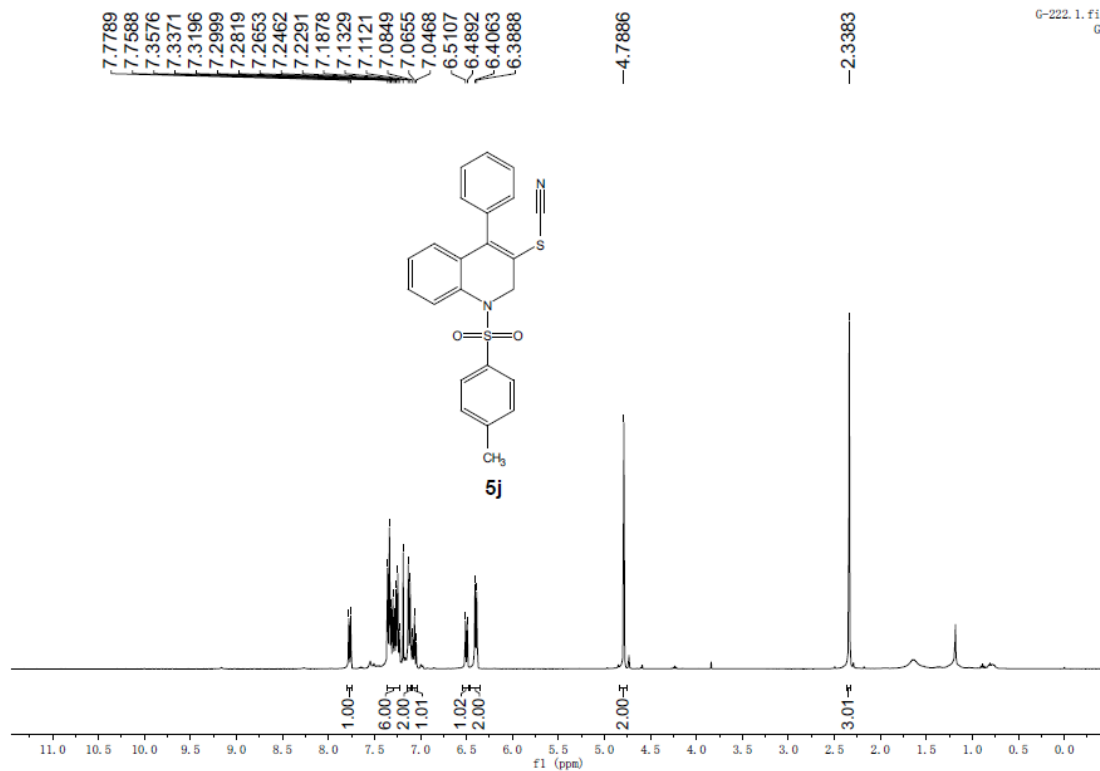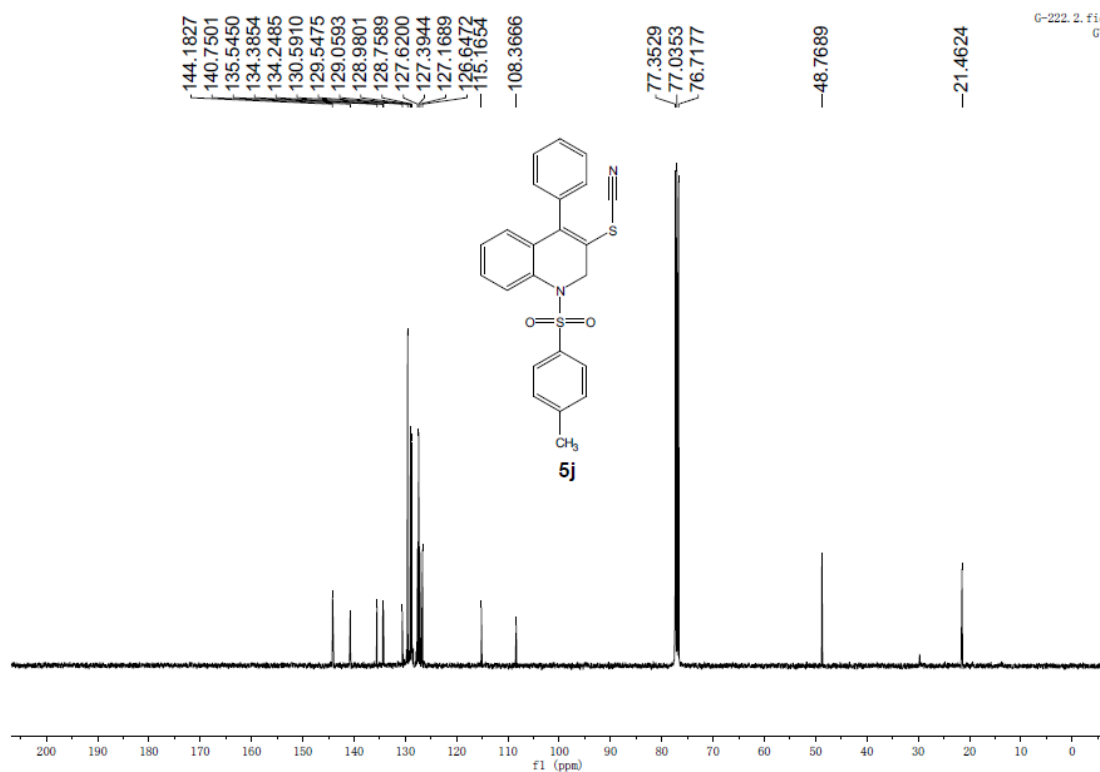

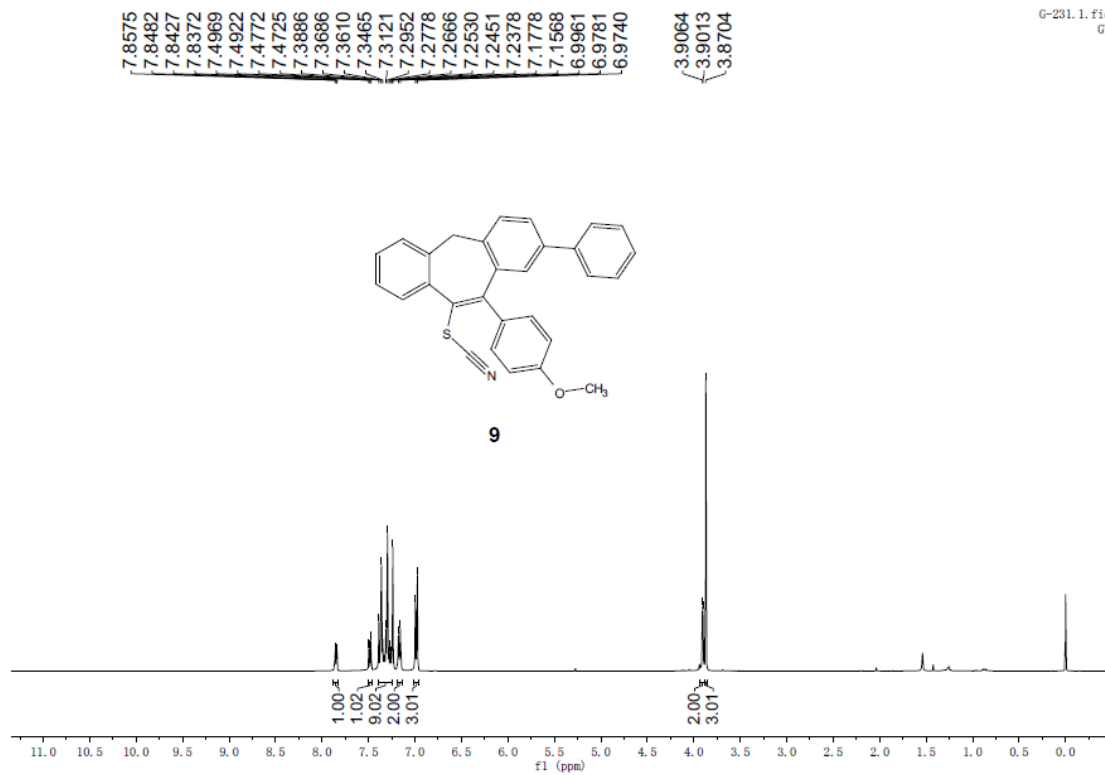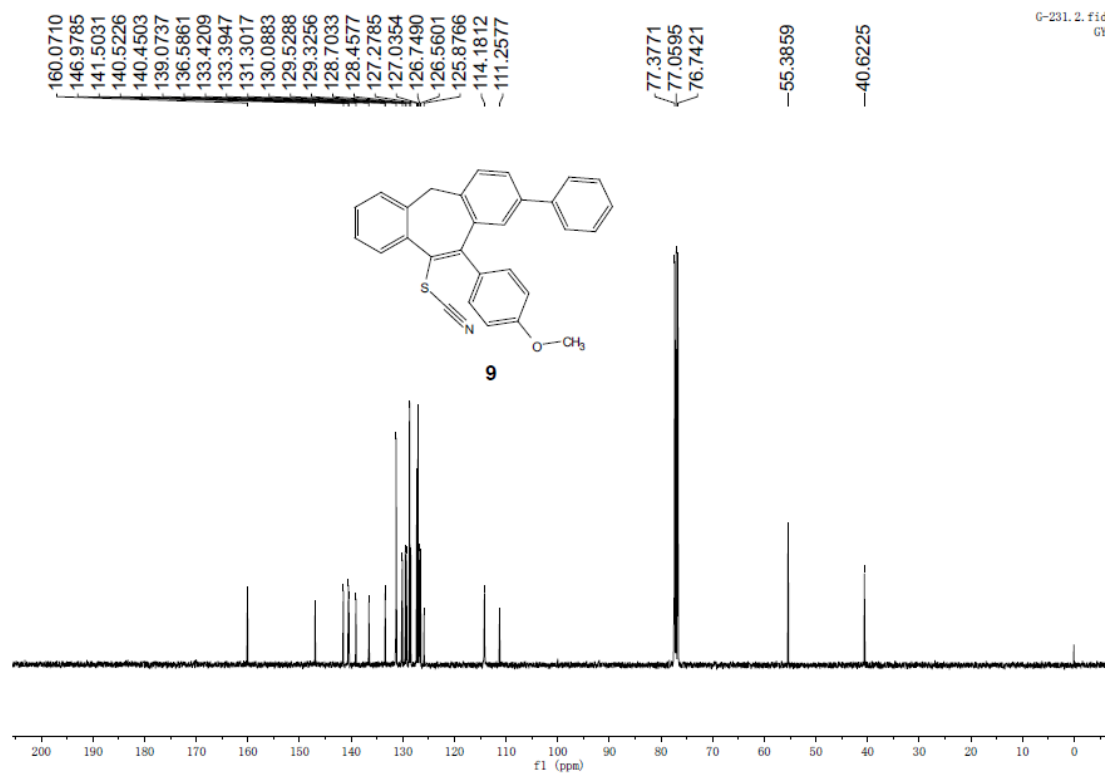

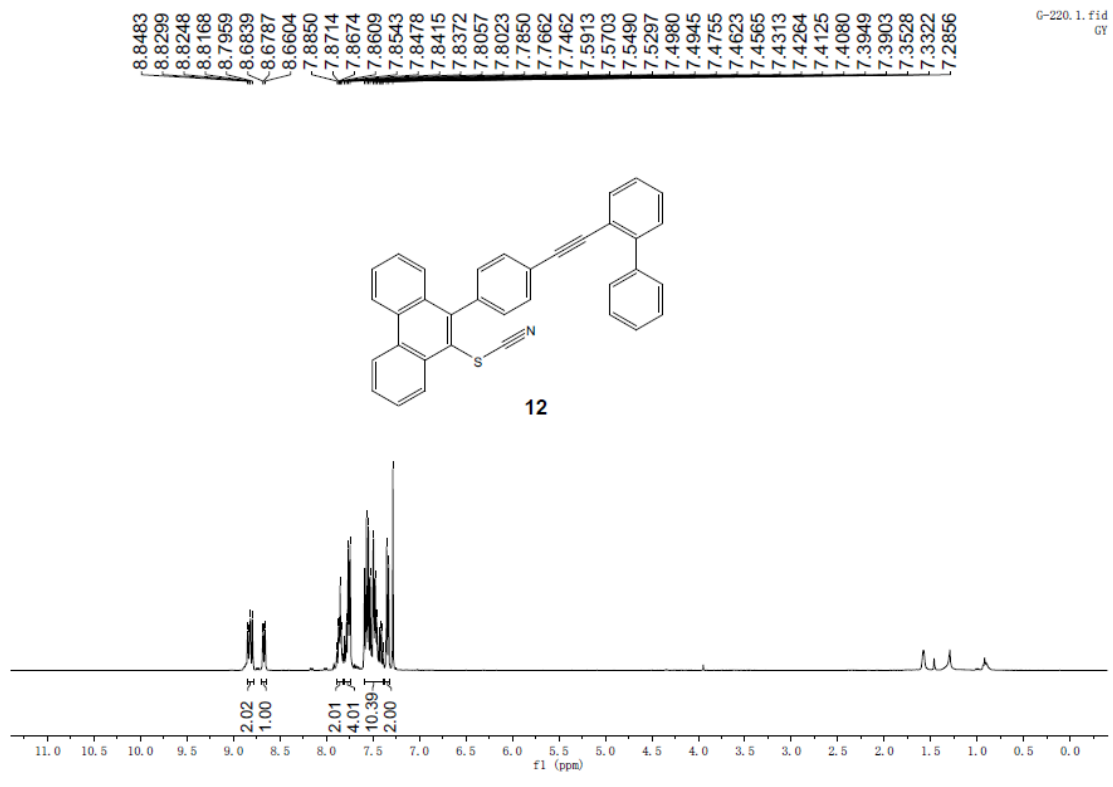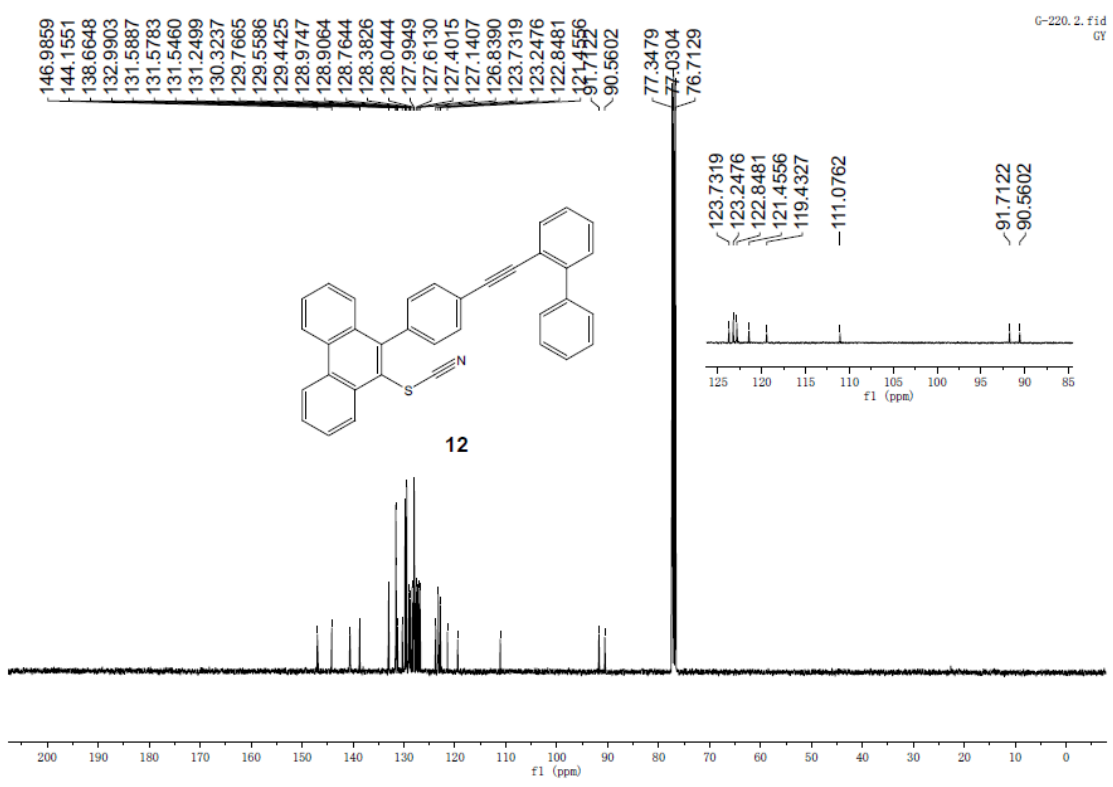

8.9698  
8.9589  
8.9462  
8.8566  
8.8438  
8.8327  
8.8152  
8.7941  
7.8780  
7.8678  
7.8576  
7.8424  
7.8320  
7.8215  
7.8111  
7.6228  
7.6108  
7.6021  
7.5860  
7.5758  
7.4964  
7.4843  
7.4771  
7.3275  
7.3095  
7.2555

G-237.1.fid  
GY

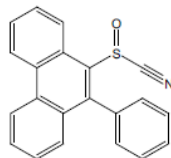

13

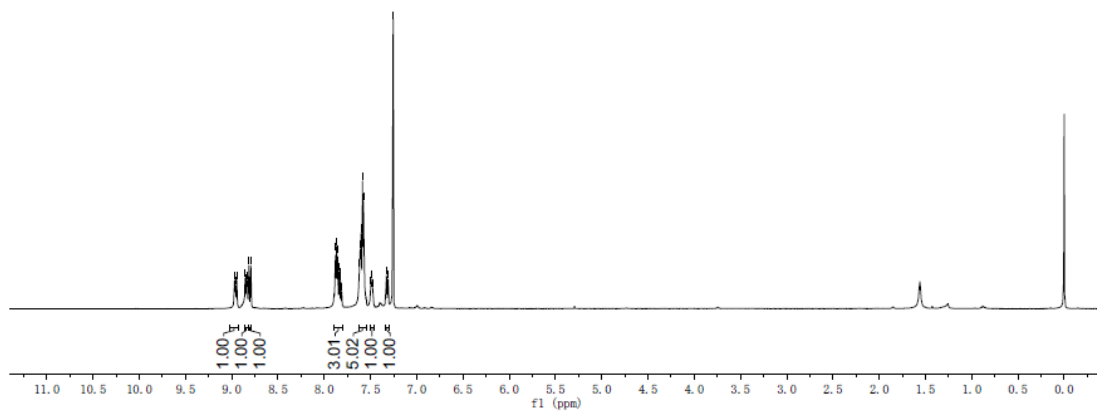

144.2902  
135.1115  
132.7907  
131.1729  
130.3686  
130.3001  
130.0319  
129.6709  
129.5384  
129.0779  
128.8045  
128.7611  
128.6446  
127.7565  
126.3181  
125.3086  
123.5193  
123.0611  
116.1900  
77.3282  
77.0107  
76.6932

G-237/2  
NS=2048 HRR

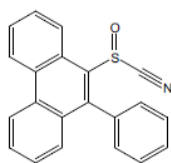

13

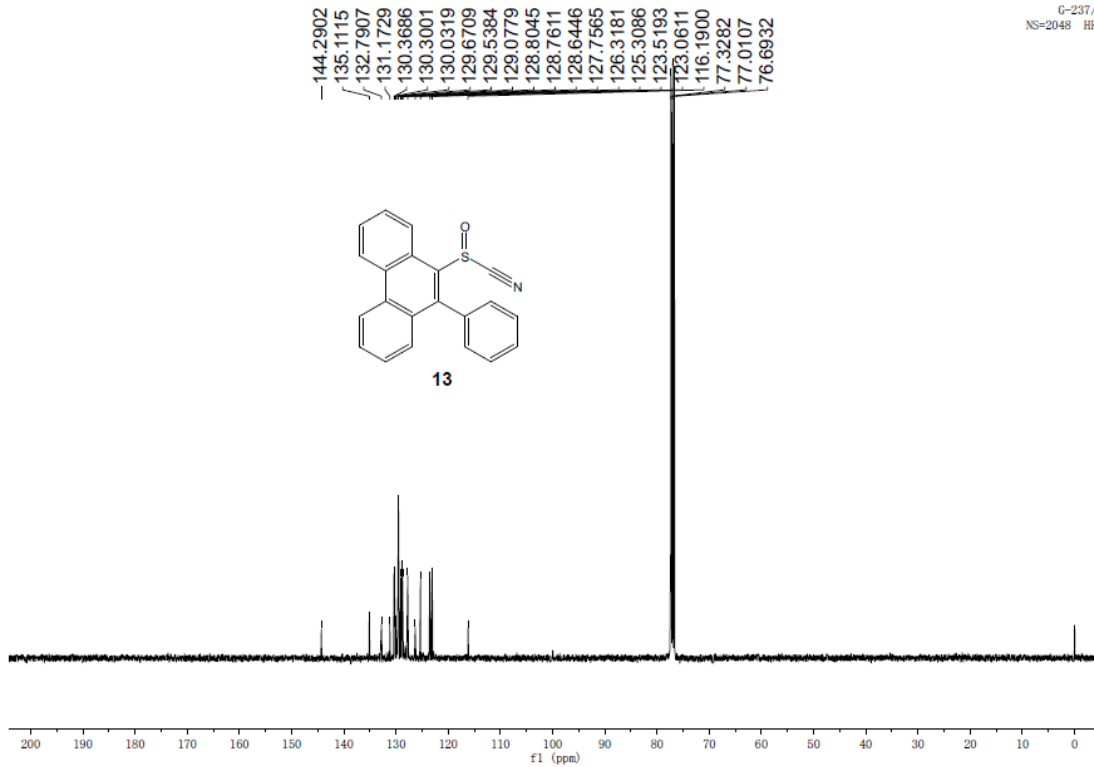

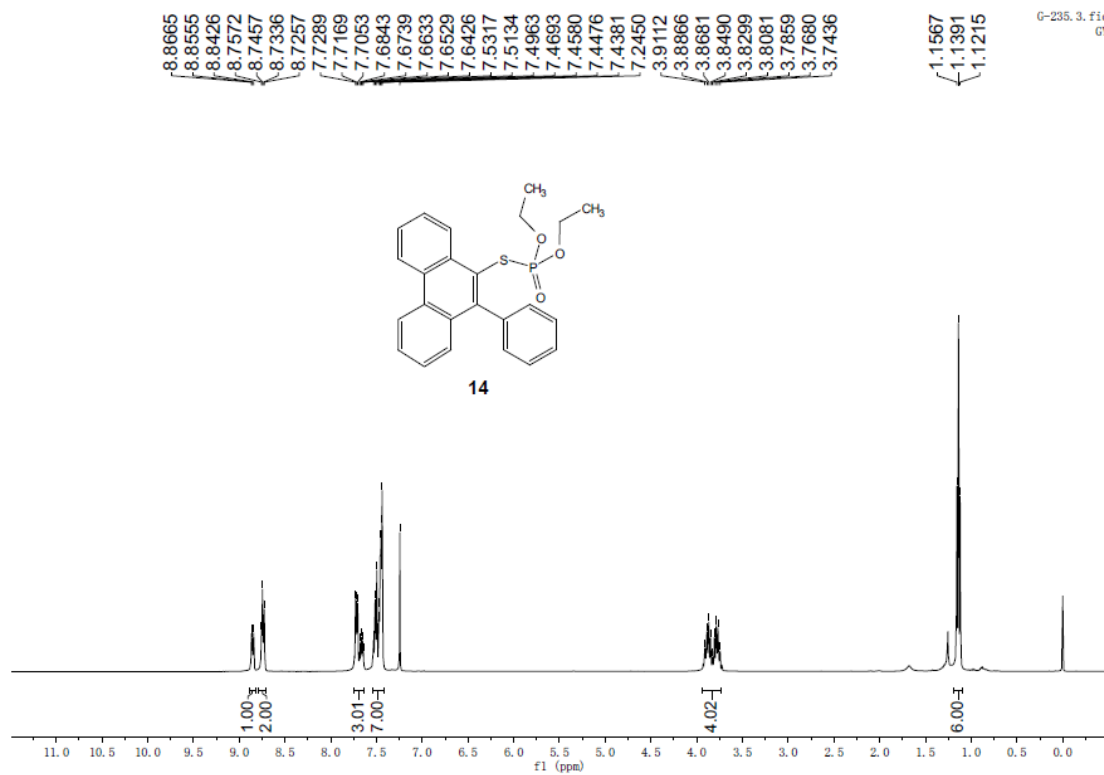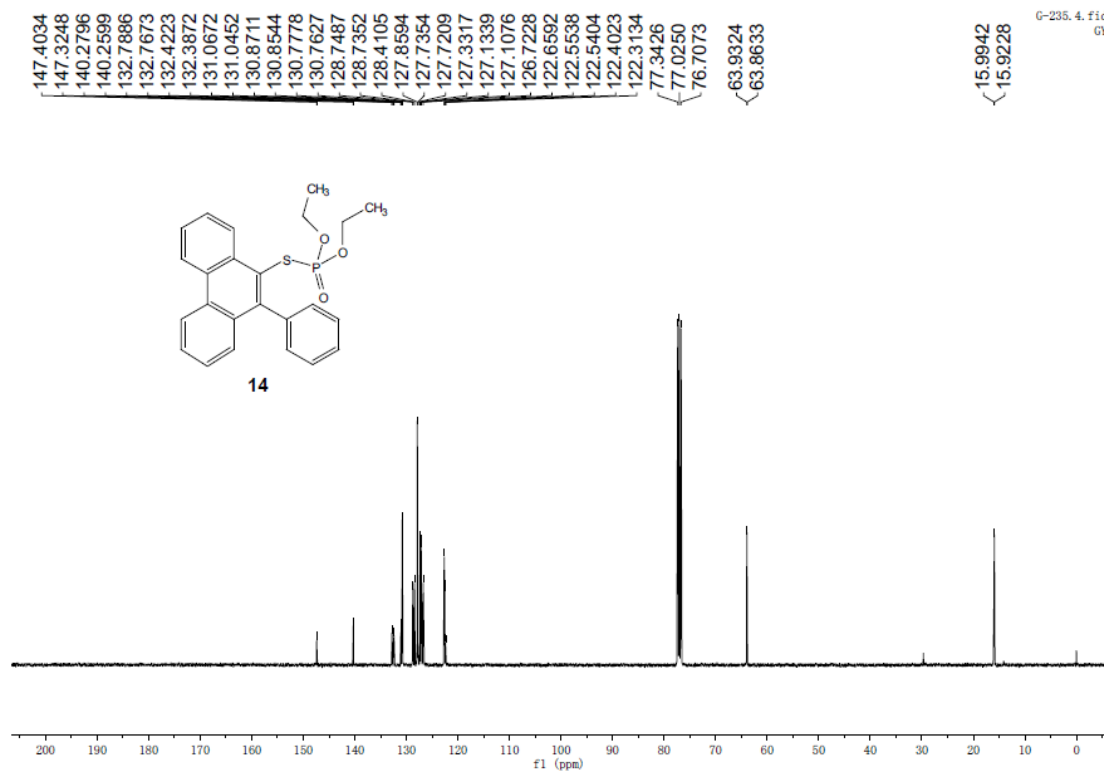



-21.8934

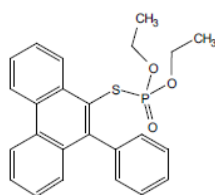

14

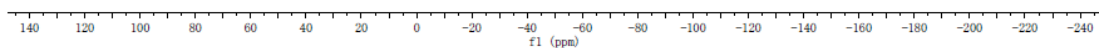

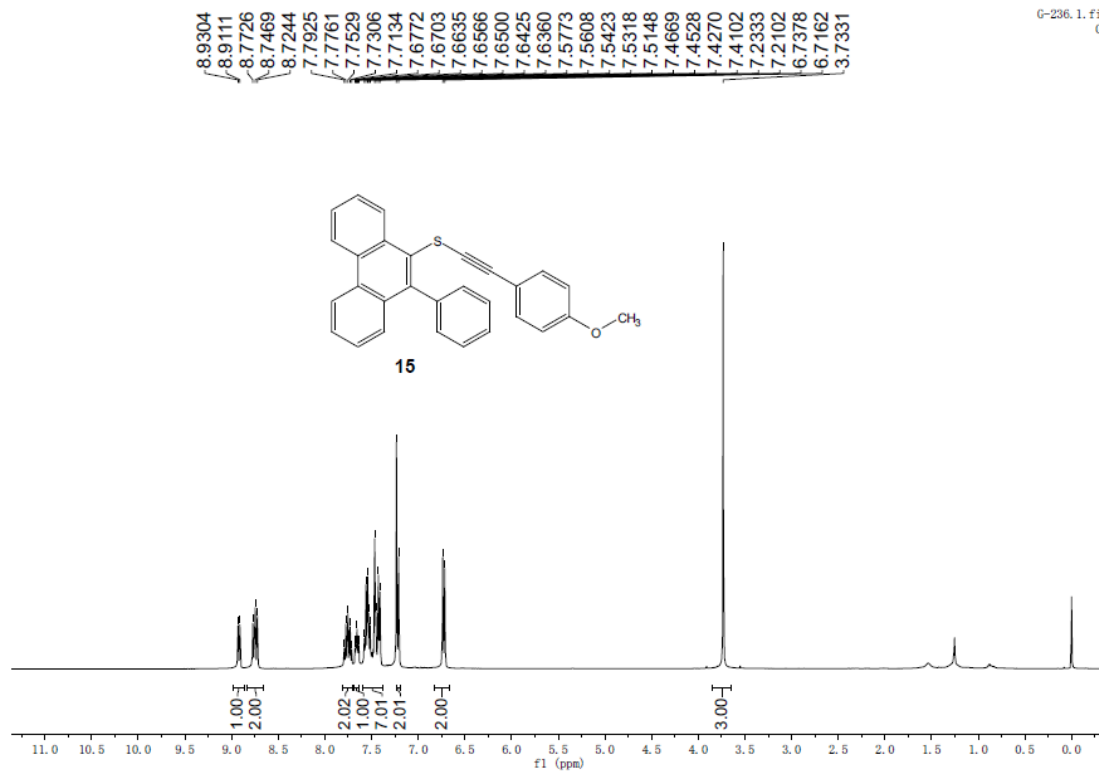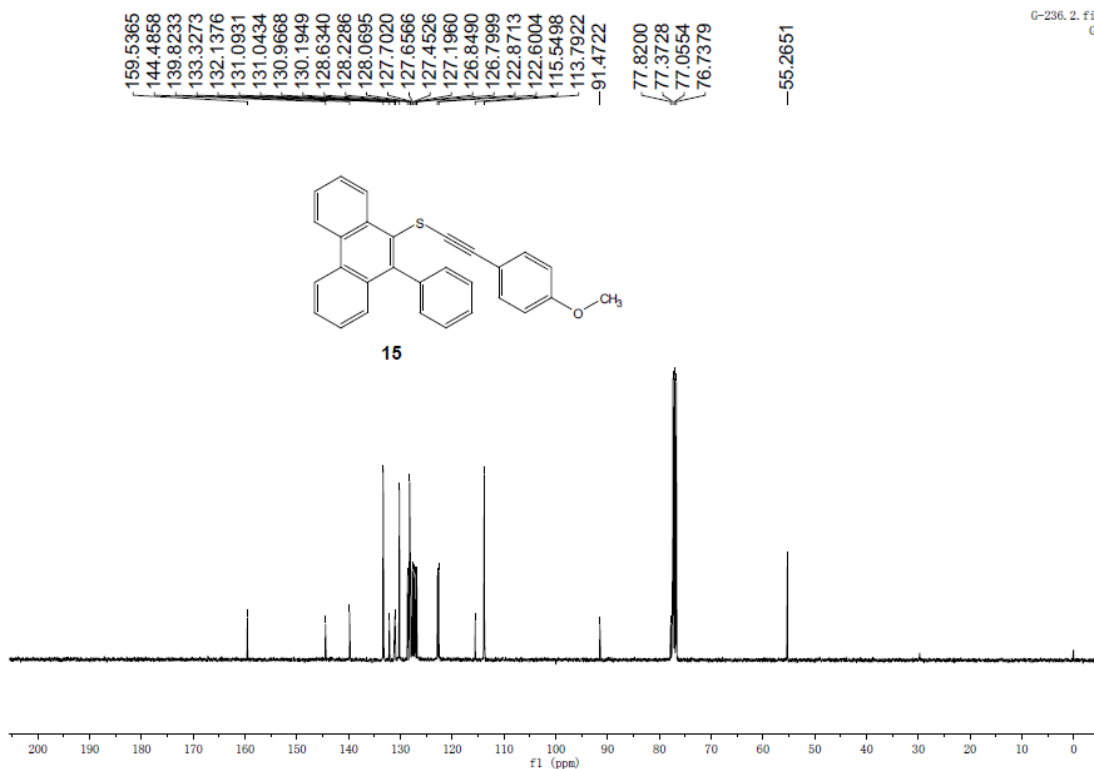

7.9662  
7.9442  
7.9086  
7.8881  
7.8377  
7.8156  
7.5632  
7.5511  
7.5440  
7.5373  
7.5330  
7.5260  
7.5179  
7.5103  
7.4319  
7.4290  
7.4248  
7.4187  
7.4167  
7.3015  
7.2949  
7.2899  
7.2823  
7.2777  
7.2414

G-234.1.fid  
CY

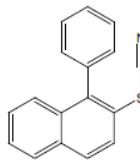

16

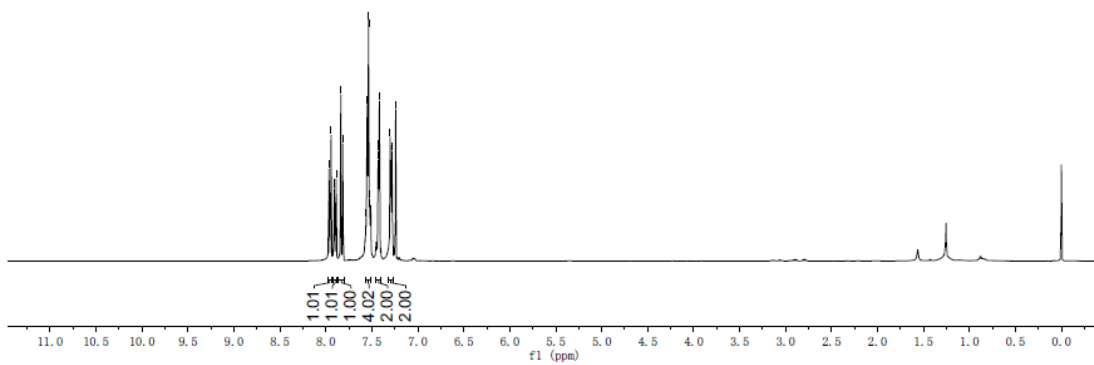

139.7455  
136.4203  
132.9689  
132.9183  
130.0246  
129.7809  
128.9765  
128.8903  
128.1319  
127.4356  
126.9991  
126.1530  
124.8463  
122.1685  
110.8901

77.3374  
77.0199  
76.7024

G-234.2.fid  
CY

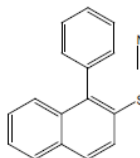

16

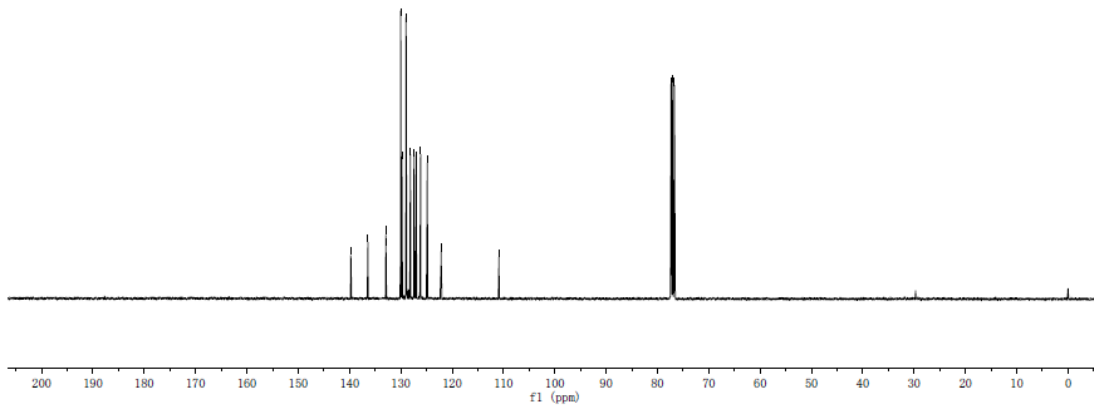

Supplement: d3ob00001j1.pdf [file d3ob00001j1.pdf]
